# Supplementary material for: Respiratory Syncytial Virus Infection Changes Cargo Composition of Exosome Released from Airway Epithelial Cells
Source: PubMed Central journal article supplement (PMC5762922; doi:10.1038/s41598-017-18672-5), 2018-01-10

## **SUPPLEMENTARY INFORMATION**

---

### **Respiratory Syncytial Virus Infection Changes Cargo Composition of Exosome Released from Airway Epithelial Cells**

**Harendra Singh Chahar<sup>1</sup>, Tiziana Corsello<sup>1</sup>, Andrzej S. Kudlicki<sup>2</sup>, Narayana Komaravelli<sup>1</sup>, Antonella Casola<sup>1,3,4\*</sup>**

<sup>1</sup>University of Texas Medical Branch at Galveston, Department of Pediatrics, Galveston, 77555, USA

<sup>2</sup>University of Texas Medical Branch at Galveston, Department of Biochemistry and Molecular Biology, Galveston, 77555, USA

<sup>3</sup>University of Texas Medical Branch at Galveston, Sealy Center for Vaccine Development, Galveston, 77555, USA

<sup>4</sup>University of Texas Medical Branch at Galveston, Sealy Center for Molecular Medicine, Galveston, 77555, USA

[\\*ancasola@utmb.edu](mailto:ancasola@utmb.edu)

## RESULTS

|                                                                                                           |    |
|-----------------------------------------------------------------------------------------------------------|----|
| <b>ST1:</b> Complete list of miRNAs whose expression in exosomes was changed following RSV infection..... | 10 |
| <b>ST2:</b> Predicted target genes of miRNAs upregulated by RSV from Table 2 .....                        | 10 |
| <b>ST3:</b> Predicted target genes of all detected miRNAs from Table 3.....                               | 10 |
| <b>ST4:</b> Predicted target genes of miRNAs downregulated by RSV from Table 2 and 3.....                 | 10 |
| <b>ST5:</b> Complete list of piRNAs whose expression in exosomes was changed following RSV infection..... | 11 |

Supplementary file legend for Gene Ontology data analysis files:

We have identified the most significantly enriched functional groups in the following categories: Gene Ontology Biological Process (GOTERM\_BP\_DIRECT), Gene\_Ontology Molecular Function (GOTERM\_MF\_DIRECT), KEGG pathway (KEGG\_PATHWAY). The results are shown in nine supplementary Excel spreadsheet files. We have imposed a p-value threshold of 0.01. Due to the large number of upregulated targets, we limited the set of targets of upregulated miRNAs to genes identified two or more times by TargetScan. The columns of the spreadsheets are as follows:

A: Type of functional category (same for all results in a file),

B: Functional category enriched,

C: Number of identified genes with the annotation from column B

D: P-Value for enrichment (uncorrected)

E: Enrichment fold

F, G, H: Significance with Bonferroni, Benjamini and FDR correction, respectively.

|                                                                                        |    |
|----------------------------------------------------------------------------------------|----|
| <b>SD1.</b> Next generation high-throughput sequencing read counts.....                | 9  |
| <b>SD2.</b> GOTERM_BP_DIRECT analysis of targets of upregulated miRNA of Table 2 ..... | 10 |
| <b>SD3.</b> GOTERM_MF_DIRECT analysis of targets of upregulated miRNA of Table 2 ....  | 10 |
| <b>SD4.</b> KEGG_PATHWAY analysis of targets of upregulated miRNA of Table 2 .....     | 10 |
| <b>SD5.</b> GOTERM_BP_DIRECT analysis of targets of downregulated miRNA of Table 2     | 10 |
| <b>SD6.</b> GOTERM_MF_DIRECT analysis of targets of downregulated miRNA of Table 2.    | 10 |
| <b>SD7.</b> KEGG_PATHWAY analysis of targets of downregulated miRNA of Table 2.....    | 10 |
| <b>SD8.</b> GOTERM_BP_DIRECT analysis of targets of miRNA of Table 3 .....             | 10 |
| <b>SD9.</b> GOTERM_MF_DIRECT analysis of targets of miRNA of Table 3 .....             | 10 |
| <b>SD10.</b> KEGG_PATHWAY analysis of targets of miRNA of Table 3 .....                | 10 |

| S.No. | miRNA           | Read Count (Avg) |          | Log2 Fold |
|-------|-----------------|------------------|----------|-----------|
|       |                 | Mock Exo         | RSV Exo  | Change    |
| 1     | hsa-mir-6087    | 45.59            | 39800.59 | 9.7699    |
| 2     | hsa-let-7e      | 0.62             | 468.17   | 9.5657    |
| 3     | hsa-miR-182-5p  | 0.25             | 43.34    | 7.4339    |
| 4     | hsa-miR-181b-5p | 0.62             | 77.21    | 6.9655    |
| 5     | hsa-mir-128-1   | 0.25             | 14.68    | 5.8724    |
| 6     | hsa-miR-19b-3p  | 0.25             | 13.24    | 5.7227    |
| 7     | hsa-mir-23b     | 1.14             | 54.52    | 5.5854    |
| 8     | hsa-let-7i      | 12.76            | 610.07   | 5.5789    |
| 9     | hsa-mir-22      | 2                | 79.13    | 5.3033    |
| 10    | hsa-miR-24-3p   | 5.98             | 229.59   | 5.263     |
| 11    | hsa-mir-182     | 1.39             | 45.8     | 5.0462    |
| 12    | hsa-mir-378a    | 0.87             | 28.12    | 5.0172    |
| 13    | hsa-mir-99b     | 1.14             | 35.93    | 4.9836    |
| 14    | hsa-miR-320b    | 2.62             | 74.63    | 4.8312    |
| 15    | hsa-let-7f-1    | 22.5             | 590.86   | 4.7148    |
| 16    | hsa-miR-4516    | 2.97             | 77.27    | 4.7001    |
| 17    | hsa-mir-21      | 121.4            | 3155.14  | 4.6999    |
| 18    | hsa-mir-30c-2   | 2.1              | 42.72    | 4.3435    |
| 19    | hsa-miR-423-5p  | 2.24             | 44.06    | 4.2989    |
| 20    | hsa-miR-320c    | 1.75             | 34.03    | 4.2788    |
| 21    | hsa-mir-23a     | 3.41             | 65.92    | 4.2744    |
| 22    | hsa-miR-25-3p   | 6.01             | 113.35   | 4.2366    |
| 23    | hsa-mir-25      | 6.01             | 113.35   | 4.2366    |
| 24    | hsa-mir-423     | 5.13             | 85.27    | 4.0558    |
| 25    | hsa-mir-324     | 0.62             | 10.25    | 4.0522    |
| 26    | hsa-miR-98-5p   | 2                | 33.18    | 4.0495    |
| 27    | hsa-miR-224-5p  | 1.14             | 15.93    | 3.8104    |
| 28    | hsa-mir-92b     | 2.25             | 29.38    | 3.704     |
| 29    | hsa-mir-10a     | 1.64             | 19.97    | 3.6088    |
| 30    | hsa-mir-221     | 36.28            | 433.51   | 3.5787    |
| 31    | hsa-miR-320d    | 1.14             | 13.17    | 3.5361    |
| 32    | hsa-mir-34a     | 1.75             | 20.13    | 3.5214    |
| 33    | hsa-let-7a-5p   | 126.89           | 1387.4   | 3.4508    |
| 34    | hsa-miR-16-5p   | 15.01            | 150.62   | 3.3266    |
| 35    | hsa-mir-106b    | 3.41             | 32.84    | 3.2689    |
| 36    | hsa-mir-4449    | 25.37            | 214.29   | 3.0785    |
| 37    | hsa-mir-103a-1  | 17.27            | 143.31   | 3.0528    |

|              |                 |                         |                |         |
|--------------|-----------------|-------------------------|----------------|---------|
| 38           | hsa-mir-320a    | 72.59                   | 504.05         | 2.7957  |
| 39           | hsa-mir-27b     | 59.5                    | 382.68         | 2.6851  |
| 40           | hsa-let-7d      | 9.27                    | 56.12          | 2.5971  |
| 41           | hsa-mir-15b     | 1.85                    | 10.13          | 2.451   |
| 42           | hsa-mir-140     | 2.52                    | 12.94          | 2.3598  |
| 43           | hsa-let-7g      | 41.88                   | 195.77         | 2.2248  |
| 44           | hsa-miR-107     | 8.38                    | 35.46          | 2.0807  |
| 45           | hsa-mir-92a-1   | 56.61                   | 238.69         | 2.0761  |
| 46           | hsa-mir-192     | 30.42                   | 128.24         | 2.0757  |
| 47           | hsa-miR-92a-3p  | 53.72                   | 225.96         | 2.0725  |
| 48           | hsa-mir-125a    | 5.51                    | 22.94          | 2.0563  |
| 49           | hsa-mir-27a     | 28.68                   | 114.13         | 1.9928  |
| 50           | hsa-miR-29a-3p  | 14.88                   | 53.23          | 1.839   |
| 51           | hsa-mir-29a     | 14.88                   | 53.23          | 1.839   |
| 52           | hsa-mir-17      | 4.63                    | 12.56          | 1.4416  |
| 53           | hsa-mir-30d     | 25.98                   | 69.77          | 1.4251  |
| 54           | hsa-miR-17-5p   | 4.63                    | 11.19          | 1.275   |
| 55           | hsa-let-7b      | 301.51                  | 717.56         | 1.2509  |
| 56           | hsa-mir-93      | 34.52                   | 79.26          | 1.1992  |
| 57           | hsa-mir-223     | 21                      | 0.17           | -6.9115 |
| 58           | hsa-mir-2964a   | 62.14                   | 0.57           | -6.7673 |
| 59           | hsa-mir-205     | 18.17                   | 0.29           | -5.9932 |
| 60           | hsa-mir-143     | 65.39                   | 1.41           | -5.5322 |
| 61           | hsa-miR-3168    | 222.71                  | 4.82           | -5.5304 |
| 62           | hsa-miR-146a-5p | 15.8                    | 0.46           | -5.1029 |
| 63           | hsa-miR-10b-5p  | 56.07                   | 4              | -3.809  |
| 64           | hsa-mir-328     | 21.77                   | 1.83           | -3.5758 |
| 65           | hsa-miR-1246    | 237.74                  | 23.03          | -3.3677 |
| 66           | hsa-miR-185-5p  | 17.3                    | 6.91           | -1.3244 |
|              |                 |                         |                |         |
|              |                 | <b>Read Count (Avg)</b> |                |         |
| <b>S.No.</b> | <b>miRNA</b>    | <b>Mock Exo</b>         | <b>RSV Exo</b> |         |
| 1            | hsa-mir-31      | 0                       | 529.15         | N/A     |
| 2            | hsa-mir-3687    | 0                       | 114.57         | N/A     |
| 3            | hsa-mir-222     | 0                       | 80.93          | N/A     |
| 4            | hsa-mir-151a    | 0                       | 66.1           | N/A     |
| 5            | hsa-miR-4449    | 0                       | 65.29          | N/A     |
| 6            | hsa-mir-663a    | 0                       | 56.03          | N/A     |
| 7            | hsa-mir-196a-2  | 0                       | 53.41          | N/A     |
| 8            | hsa-mir-4508    | 0                       | 37.12          | N/A     |
| 9            | hsa-mir-1248    | 0                       | 34.64          | N/A     |

|    |                 |       |       |     |
|----|-----------------|-------|-------|-----|
| 10 | hsa-miR-4497    | 0     | 28.19 | N/A |
| 11 | hsa-mir-1273f   | 0     | 28.08 | N/A |
| 12 | hsa-mir-28      | 0     | 26.67 | N/A |
| 13 | hsa-mir-191     | 0     | 20.44 | N/A |
| 14 | hsa-miR-3648    | 0     | 17.54 | N/A |
| 15 | hsa-miR-194-5p  | 0     | 17.14 | N/A |
| 16 | hsa-miR-128     | 0     | 14.3  | N/A |
| 17 | hsa-mir-1307    | 0     | 13.91 | N/A |
| 18 | hsa-mir-744     | 0     | 13.07 | N/A |
| 19 | hsa-miR-148b-3p | 0     | 12.31 | N/A |
| 20 | hsa-miR-1307-3p | 0     | 12.02 | N/A |
| 21 | hsa-mir-663b    | 0     | 11.33 | N/A |
| 22 | hsa-miR-152     | 0     | 11.19 | N/A |
| 23 | hsa-mir-421     | 0     | 10.99 | N/A |
| 24 | hsa-mir-7-1     | 0     | 10.43 | N/A |
| 25 | hsa-mir-486     | 0     | 10.26 | N/A |
| 26 | hsa-miR-1321    | 50.5  | 0     | N/A |
| 27 | hsa-mir-204     | 34.07 | 0     | N/A |
| 28 | hsa-mir-637     | 22.18 | 0     | N/A |
| 29 | hsa-mir-4689    | 19.39 | 0     | N/A |
| 30 | hsa-mir-144     | 15.38 | 0     | N/A |
| 31 | hsa-miR-4269    | 11.12 | 0     | N/A |
| 32 | hsa-mir-885     | 10.5  | 0     | N/A |
| 33 | hsa-mir-4795    | 10.5  | 0     | N/A |
| 34 | hsa-mir-718     | 10.29 | 0     | N/A |

Supplementary Table 1. Complete list of miRNAs whose expression in exosomes was changed following RSV infection.

Supplementary Table 2. Predicted target genes of miRNAs upregulated by RSV from Table 2.

| Target Gene | Number of miRNAs |
|-------------|------------------|
| TRIM71      | 20               |
| FIGN        | 17               |
| ONECUT2     | 16               |
| HIC2        | 15               |
| IGF2BP1     | 15               |
| AGO3        | 14               |
| CHIC1       | 14               |
| HMGA2       | 14               |
| AGO2        | 13               |
| SESN3       | 13               |
| CLCN5       | 12               |
| ANKRD52     | 11               |
| CCND2       | 11               |
| FOXP2       | 11               |
| LIN28B      | 11               |
| NR6A1       | 11               |
| ONECUT3     | 11               |
| QKI         | 11               |
| ACVR2B      | 10               |
| ARID3B      | 10               |
| CNNM2       | 10               |
| FZD3        | 10               |
| GABRB1      | 10               |
| LPP         | 10               |
| PBX3        | 10               |
| POU2F1      | 10               |
| TAOK1       | 10               |
| ZNF286B     | 10               |
| ZNF704      | 10               |
| ABHD13      | 9                |
| BNC2        | 9                |
| CPD         | 9                |
| DCUN1D3     | 9                |
| FRS2        | 9                |
| IGDCC3      | 9                |

|            |   |
|------------|---|
| INO80D     | 9 |
| KDM5A      | 9 |
| KIAA2022   | 9 |
| MTDH       | 9 |
| NUFIP2     | 9 |
| S1PR1      | 9 |
| SKIL       | 9 |
| STOX2      | 9 |
| ZBTB20     | 9 |
| ZNF652     | 9 |
| AAK1       | 8 |
| ATXN1      | 8 |
| CPEB4      | 8 |
| DCUN1D1    | 8 |
| FAM222B    | 8 |
| FNDC3B     | 8 |
| GXYLT1     | 8 |
| IGF1R      | 8 |
| KCNC3      | 8 |
| KCTD16     | 8 |
| KLF7       | 8 |
| MBD2       | 8 |
| MEX3A      | 8 |
| PBX2       | 8 |
| PLXNC1     | 8 |
| PURB       | 8 |
| USP44      | 8 |
| YAF2       | 8 |
| YOD1       | 8 |
| ZBTB16     | 8 |
| AGO4       | 7 |
| AKT3       | 7 |
| AL590483.1 | 7 |
| ARID3A     | 7 |
| ARPP19     | 7 |
| ATXN3      | 7 |

|           |   |
|-----------|---|
| BEND4     | 7 |
| C14orf28  | 7 |
| CBX5      | 7 |
| CDC73     | 7 |
| CLOCK     | 7 |
| CREBRF    | 7 |
| CSRNP3    | 7 |
| CYLD      | 7 |
| DYRK2     | 7 |
| EGR3      | 7 |
| EOGT      | 7 |
| GAN       | 7 |
| GIGYF1    | 7 |
| IRF6      | 7 |
| ITGB3     | 7 |
| ITGB8     | 7 |
| KCMF1     | 7 |
| LCOR      | 7 |
| LRIG2     | 7 |
| MAPK1     | 7 |
| MAPK1IP1L | 7 |
| MTMR12    | 7 |
| NOVA2     | 7 |
| ONECUT1   | 7 |
| PAPPA     | 7 |
| PBX1      | 7 |
| PCDHA10   | 7 |
| PCDHA11   | 7 |
| PCDHA12   | 7 |
| PCDHA13   | 7 |
| PCDHA1    | 7 |
| PCDHA2    | 7 |
| PCDHA3    | 7 |
| PCDHA4    | 7 |
| PCDHA5    | 7 |
| PCDHA6    | 7 |
| PCDHA7    | 7 |
| PCDHA8    | 7 |

|           |   |
|-----------|---|
| PCDHA9    | 7 |
| PCDHAC1   | 7 |
| PCDHAC2   | 7 |
| PGM2L1    | 7 |
| PTPRD     | 7 |
| RAB3GAP2  | 7 |
| RIT1      | 7 |
| RNF152    | 7 |
| SALL4     | 7 |
| SH2B3     | 7 |
| SNX30     | 7 |
| SOX6      | 7 |
| SREK1     | 7 |
| ST3GAL1   | 7 |
| TET3      | 7 |
| TGFBR1    | 7 |
| THRA      | 7 |
| TNPO1     | 7 |
| TSC22D2   | 7 |
| WDFY2     | 7 |
| ZBTB10    | 7 |
| ZBTB37    | 7 |
| ZNF24     | 7 |
| ZNF280B   | 7 |
| ADCY9     | 6 |
| ATXN1L    | 6 |
| BMP2K     | 6 |
| BRWD1     | 6 |
| BRWD3     | 6 |
| BZW1      | 6 |
| C1GALT1   | 6 |
| C20orf194 | 6 |
| CELF1     | 6 |
| CFL2      | 6 |
| CPEB1     | 6 |
| DCAF8     | 6 |
| DDX3X     | 6 |
| DICER1    | 6 |

|          |   |
|----------|---|
| DLC1     | 6 |
| DLGAP4   | 6 |
| DMD      | 6 |
| DNAJA2   | 6 |
| DNAL1    | 6 |
| DR1      | 6 |
| DTNA     | 6 |
| ETNK1    | 6 |
| EXOC5    | 6 |
| FNDC3A   | 6 |
| GNAQ     | 6 |
| GPCPD1   | 6 |
| GRIN2A   | 6 |
| HIF1AN   | 6 |
| HS2ST1   | 6 |
| ITSN1    | 6 |
| KIAA1244 | 6 |
| KIAA1958 | 6 |
| KLHL15   | 6 |
| KPNA4    | 6 |
| LGALSL   | 6 |
| LPGAT1   | 6 |
| LRRC40   | 6 |
| MEF2C    | 6 |
| MEIS2    | 6 |
| MSI2     | 6 |
| NFIA     | 6 |
| NKAP     | 6 |
| NLN      | 6 |
| OSBPL3   | 6 |
| PIK3CA   | 6 |
| PLXDC2   | 6 |
| PLXNA4   | 6 |
| PPARGC1B | 6 |
| PRR14L   | 6 |
| PTAFR    | 6 |
| PTAR1    | 6 |
| PTEN     | 6 |

|          |   |
|----------|---|
| PXDN     | 6 |
| RAP2C    | 6 |
| RASA1    | 6 |
| RGS17    | 6 |
| RIMKLA   | 6 |
| RIMS4    | 6 |
| RORA     | 6 |
| SDK1     | 6 |
| SFMBT1   | 6 |
| SLC16A10 | 6 |
| SOX12    | 6 |
| SOX4     | 6 |
| STARD13  | 6 |
| SYNCRIP  | 6 |
| TGFBR2   | 6 |
| TMEM178B | 6 |
| TMEM64   | 6 |
| TNIK     | 6 |
| TNRC6B   | 6 |
| TOR1AIP2 | 6 |
| TSC1     | 6 |
| UBN2     | 6 |
| WWC2     | 6 |
| XKR4     | 6 |
| ZBTB4    | 6 |
| ZNF512B  | 6 |
| ZNF697   | 6 |
| ABL2     | 5 |
| ACAP2    | 5 |
| ACVR2A   | 5 |
| AGO1     | 5 |
| ANKFY1   | 5 |
| AP3M1    | 5 |
| APBA1    | 5 |
| ARL5A    | 5 |
| ATP11A   | 5 |
| ATXN7L3  | 5 |
| B3GALT1  | 5 |



|               |   |
|---------------|---|
| BEND3         | 5 |
| BPTF          | 5 |
| C19orf26      | 5 |
| CACNA1E       | 5 |
| CACNB4        | 5 |
| CALN1         | 5 |
| CBFA2T3       | 5 |
| CCDC144A      | 5 |
| CDK13         | 5 |
| CDK6          | 5 |
| CECR6         | 5 |
| CNKSR3        | 5 |
| CNOT6L        | 5 |
| CPEB3         | 5 |
| CTD-2140B24.4 | 5 |
| CTDSPL2       | 5 |
| CYB561D1      | 5 |
| DCBLD2        | 5 |
| DDI2          | 5 |
| DDX3Y         | 5 |
| DUSP16        | 5 |
| ERO1L         | 5 |
| EVX2          | 5 |
| FOXP1         | 5 |
| GALNT1        | 5 |
| GATA6         | 5 |
| GDF5OS        | 5 |
| GMFB          | 5 |
| GPBP1         | 5 |
| GPR61         | 5 |
| GRAMD1B       | 5 |
| GREB1L        | 5 |
| HAS2          | 5 |
| HCFC2         | 5 |
| HOXA1         | 5 |
| IGF2BP2       | 5 |
| IGF2BP3       | 5 |
| KCNJ6         | 5 |

|          |   |
|----------|---|
| KIAA0247 | 5 |
| KIAA1549 | 5 |
| KLF13    | 5 |
| KLF8     | 5 |
| KLHL3    | 5 |
| KLHL36   | 5 |
| KMT2E    | 5 |
| LIN28A   | 5 |
| LMLN     | 5 |
| LPHN3    | 5 |
| MAP1B    | 5 |
| MAP3K3   | 5 |
| MGLL     | 5 |
| MIB1     | 5 |
| MIER1    | 5 |
| MITF     | 5 |
| MKL2     | 5 |
| MTF2     | 5 |
| MXI1     | 5 |
| MYCN     | 5 |
| N4BP1    | 5 |
| NAA20    | 5 |
| NABP1    | 5 |
| NAP1L1   | 5 |
| NEDD4L   | 5 |
| NEK9     | 5 |
| NLK      | 5 |
| NRAS     | 5 |
| NRK      | 5 |
| NXT2     | 5 |
| OTUD7B   | 5 |
| PARM1    | 5 |
| PARP8    | 5 |
| PCGF3    | 5 |
| PDK3     | 5 |
| PDZD8    | 5 |
| PHC1     | 5 |
| PHIP     | 5 |

|          |   |
|----------|---|
| PLAG1    | 5 |
| PPP1R15B | 5 |
| PRDM1    | 5 |
| PRKAR2A  | 5 |
| PRLR     | 5 |
| PTCHD1   | 5 |
| PYGO2    | 5 |
| RAB30    | 5 |
| RAB8B    | 5 |
| RAD23B   | 5 |
| REEP1    | 5 |
| RGS9BP   | 5 |
| RICTOR   | 5 |
| RNF165   | 5 |
| RNF38    | 5 |
| RSF1     | 5 |
| RUNX1T1  | 5 |
| SAMD4A   | 5 |
| SCN1A    | 5 |
| SEMA4G   | 5 |
| SENP2    | 5 |
| SH3KBP1  | 5 |
| SKIDA1   | 5 |
| SLAIN2   | 5 |
| SLC10A7  | 5 |
| SLC30A7  | 5 |
| SLC6A6   | 5 |
| SLC7A14  | 5 |
| SNN      | 5 |
| SRSF7    | 5 |
| STIM2    | 5 |
| STK24    | 5 |
| STRN     | 5 |
| SYT11    | 5 |
| TANC2    | 5 |
| TFAP2B   | 5 |
| TMEM151B | 5 |
| TMEM246  | 5 |

|             |   |
|-------------|---|
| TRIM41      | 5 |
| USP15       | 5 |
| VANGL2      | 5 |
| VCPIP1      | 5 |
| VGLL3       | 5 |
| WIPI2       | 5 |
| WNT9B       | 5 |
| XIAP        | 5 |
| XYLT1       | 5 |
| ZBTB7A      | 5 |
| ZMYND11     | 5 |
| ZNF200      | 5 |
| ZNF268      | 5 |
| ZNF292      | 5 |
| ZNF516      | 5 |
| ZNF644      | 5 |
| ZNF710      | 5 |
| ZNF772      | 5 |
| ZNF791      | 5 |
| AC140061.12 | 4 |
| ACER2       | 4 |
| ACER3       | 4 |
| ACSL6       | 4 |
| ADAMTS15    | 4 |
| ADAMTS5     | 4 |
| ADCY6       | 4 |
| ADRB1       | 4 |
| AEN         | 4 |
| AFF1        | 4 |
| AIFM1       | 4 |
| AKAP2       | 4 |
| AKAP5       | 4 |
| AMMECR1L    | 4 |
| APBB2       | 4 |
| AQR         | 4 |
| ARID5B      | 4 |
| ARL5B       | 4 |
| ASXL2       | 4 |

|         |   |
|---------|---|
| ATAD2B  | 4 |
| ATF7IP2 | 4 |
| ATG14   | 4 |
| ATG16L1 | 4 |
| ATP2A2  | 4 |
| ATP2B2  | 4 |
| ATXN7   | 4 |
| AZIN1   | 4 |
| B3GNT7  | 4 |
| BACH1   | 4 |
| BAHD1   | 4 |
| BCAP29  | 4 |
| BCAT1   | 4 |
| BCL2L11 | 4 |
| BDP1    | 4 |
| BLCAP   | 4 |
| BLOC1S6 | 4 |
| BMPR1A  | 4 |
| BMPR2   | 4 |
| BSN     | 4 |
| BTBD3   | 4 |
| BVES    | 4 |
| CACNA1C | 4 |
| CADM2   | 4 |
| CALM1   | 4 |
| CAMSAP2 | 4 |
| CBL     | 4 |
| CBX7    | 4 |
| CCNJ    | 4 |
| CCNT2   | 4 |
| CCR7    | 4 |
| CDC34   | 4 |
| CDH20   | 4 |
| CDV3    | 4 |
| CECR2   | 4 |
| CHD7    | 4 |
| CHMP7   | 4 |
| CHST3   | 4 |

|            |   |
|------------|---|
| CHSY3      | 4 |
| CLASP1     | 4 |
| CNKSR2     | 4 |
| CNOT2      | 4 |
| CNOT6      | 4 |
| COL27A1    | 4 |
| COPS2      | 4 |
| CPEB2      | 4 |
| CREBL2     | 4 |
| CRK        | 4 |
| CTB-54O9.9 | 4 |
| CTPS1      | 4 |
| CUL5       | 4 |
| CYTH3      | 4 |
| DAB1       | 4 |
| DCP1A      | 4 |
| DCX        | 4 |
| DENND6A    | 4 |
| DIAPH2     | 4 |
| DLGAP2     | 4 |
| DNAJB14    | 4 |
| DPYSL3     | 4 |
| DST        | 4 |
| DTX2       | 4 |
| DTX4       | 4 |
| DVL3       | 4 |
| DYNC1LI2   | 4 |
| E2F2       | 4 |
| EEA1       | 4 |
| EFNB2      | 4 |
| ELL2       | 4 |
| ELMSAN1    | 4 |
| EMB        | 4 |
| EMC7       | 4 |
| ENAH       | 4 |
| EPC1       | 4 |
| EPHA4      | 4 |
| EPN2       | 4 |

|          |   |
|----------|---|
| ETV3     | 4 |
| EVI5     | 4 |
| EYA3     | 4 |
| FAM117B  | 4 |
| FAM118A  | 4 |
| FAM160B1 | 4 |
| FAM168A  | 4 |
| FAM179B  | 4 |
| FAM208A  | 4 |
| FAM43A   | 4 |
| FAM63B   | 4 |
| FAXC     | 4 |
| FMR1     | 4 |
| FNIP2    | 4 |
| FRMD4B   | 4 |
| FSD2     | 4 |
| FUT9     | 4 |
| FXR1     | 4 |
| GAS7     | 4 |
| GATSL2   | 4 |
| GBX2     | 4 |
| GCNT4    | 4 |
| GID4     | 4 |
| GJC1     | 4 |
| GK5      | 4 |
| GNAL     | 4 |
| GNS      | 4 |
| GRIN2B   | 4 |
| HECTD2   | 4 |
| HELZ     | 4 |
| HHIP     | 4 |
| HIAT1    | 4 |
| HIC1     | 4 |
| HIF3A    | 4 |
| HLF      | 4 |
| HNRNPA1  | 4 |
| HOXA9    | 4 |
| HOXD1    | 4 |

|          |   |
|----------|---|
| IGF1     | 4 |
| IKZF1    | 4 |
| IL1RAPL1 | 4 |
| IL6R     | 4 |
| IMPG2    | 4 |
| IPO5     | 4 |
| ITGA1    | 4 |
| JAZF1    | 4 |
| JHDM1D   | 4 |
| KCND3    | 4 |
| KLF6     | 4 |
| KMT2A    | 4 |
| KPNA1    | 4 |
| KRAS     | 4 |
| LBR      | 4 |
| LEPROTL1 | 4 |
| LHX9     | 4 |
| LIMCH1   | 4 |
| LIMD2    | 4 |
| LMTK2    | 4 |
| LPHN1    | 4 |
| LPHN2    | 4 |
| MAP3K2   | 4 |
| MAPK8    | 4 |
| MARCH9   | 4 |
| MBLAC2   | 4 |
| MBNL2    | 4 |
| MBNL3    | 4 |
| MBTPS2   | 4 |
| MDM4     | 4 |
| MED12L   | 4 |
| MED28    | 4 |
| MEF2A    | 4 |
| MEF2D    | 4 |
| MFAP3L   | 4 |
| MIER3    | 4 |
| MLEC     | 4 |
| MMP16    | 4 |

|             |   |
|-------------|---|
| MOB3B       | 4 |
| MRPS25      | 4 |
| MSANTD4     | 4 |
| MXD1        | 4 |
| MYRIP       | 4 |
| MZT1        | 4 |
| NAA30       | 4 |
| NACC2       | 4 |
| NCKAP1      | 4 |
| NFIB        | 4 |
| NFIC        | 4 |
| NIPAL4      | 4 |
| NOVA1       | 4 |
| NRP1        | 4 |
| NSUN3       | 4 |
| NUP37       | 4 |
| OTUD3       | 4 |
| PACS2       | 4 |
| PAK1        | 4 |
| PALM2       | 4 |
| PALM2-AKAP2 | 4 |
| PAN3        | 4 |
| PAPD5       | 4 |
| PAQR3       | 4 |
| PARD6B      | 4 |
| PCDH19      | 4 |
| PCGF5       | 4 |
| PDE12       | 4 |
| PDGFRA      | 4 |
| PGRMC1      | 4 |
| PHF8        | 4 |
| PI4K2A      | 4 |
| PKN2        | 4 |
| PLEKHA3     | 4 |
| PLEKHA8     | 4 |
| PLEKHO1     | 4 |
| PPM1L       | 4 |
| PPP1R12B    | 4 |

|               |   |
|---------------|---|
| PPP1R16B      | 4 |
| PRKAA2        | 4 |
| PRKAB2        | 4 |
| PRKACB        | 4 |
| PROX1         | 4 |
| PRSS22        | 4 |
| PTPRG         | 4 |
| RAB11FIP4     | 4 |
| RAB27A        | 4 |
| RAB2A         | 4 |
| RALGPS1       | 4 |
| RANBP2        | 4 |
| RAP1A         | 4 |
| RAP1B         | 4 |
| RAPGEF2       | 4 |
| RASL10B       | 4 |
| RGP1          | 4 |
| RIMS3         | 4 |
| RNF150        | 4 |
| RNF20         | 4 |
| RNF217        | 4 |
| RNF44         | 4 |
| RP1-170O19.20 | 4 |
| RRAGD         | 4 |
| RRP1B         | 4 |
| SAMD12        | 4 |
| SAR1B         | 4 |
| SCN8A         | 4 |
| SCUBE3        | 4 |
| SECISBP2L     | 4 |
| SEMA4C        | 4 |
| SEN5          | 4 |
| SESTD1        | 4 |
| SLC25A12      | 4 |
| SLC26A9       | 4 |
| SLC30A1       | 4 |
| SLC5A3        | 4 |
| SLC8A1        | 4 |

|          |   |
|----------|---|
| SMARCAD1 | 4 |
| SMARCC1  | 4 |
| SMC1A    | 4 |
| SMCR8    | 4 |
| SMURF2   | 4 |
| SNTB2    | 4 |
| SNX17    | 4 |
| SOCS4    | 4 |
| SOX5     | 4 |
| SP1      | 4 |
| SPATA13  | 4 |
| SPATA2   | 4 |
| SPATS2L  | 4 |
| SPIRE1   | 4 |
| SREK1IP1 | 4 |
| SYT1     | 4 |
| TBL1X    | 4 |
| TBX18    | 4 |
| TET2     | 4 |
| TGFBR3   | 4 |
| THBS1    | 4 |
| TIA1     | 4 |
| TMCC1    | 4 |
| TMEM106B | 4 |
| TMEM2    | 4 |
| TMEM255A | 4 |
| TMEM41A  | 4 |
| TNKS     | 4 |
| TNRC6C   | 4 |
| TP53     | 4 |
| TP53INP1 | 4 |
| TPD52L2  | 4 |
| TRABD2B  | 4 |
| TRHDE    | 4 |
| TRIM67   | 4 |
| TRPM6    | 4 |
| TTL4     | 4 |
| UGCG     | 4 |

|            |   |
|------------|---|
| UGGT1      | 4 |
| UNKL       | 4 |
| USP46      | 4 |
| VEZT       | 4 |
| VKORC1L1   | 4 |
| VLDLR      | 4 |
| VSTM5      | 4 |
| WARS2      | 4 |
| WASL       | 4 |
| WDTC1      | 4 |
| WNK3       | 4 |
| YIPF6      | 4 |
| YY1        | 4 |
| ZADH2      | 4 |
| ZC3H7B     | 4 |
| ZFP36L1    | 4 |
| ZFP36L2    | 4 |
| ZIC3       | 4 |
| ZNF207     | 4 |
| ZNF256     | 4 |
| ZNF275     | 4 |
| ZNF281     | 4 |
| ZNF788     | 4 |
| ABCB9      | 3 |
| ABHD17C    | 3 |
| AC010441.1 | 3 |
| ACVR1B     | 3 |
| ACVR1C     | 3 |
| ADAM10     | 3 |
| ADAMTS1    | 3 |
| ADAMTS14   | 3 |
| ADAMTS18   | 3 |
| ADARB1     | 3 |
| ADD3       | 3 |
| ADIPOR2    | 3 |
| AGFG1      | 3 |
| AGMAT      | 3 |
| AGPAT3     | 3 |

|          |   |
|----------|---|
| AGPAT9   | 3 |
| AGPS     | 3 |
| AK3      | 3 |
| ALDH6A1  | 3 |
| ALG9     | 3 |
| ANGPTL2  | 3 |
| ANKRD13C | 3 |
| ANKRD33B | 3 |
| ANXA11   | 3 |
| ARF3     | 3 |
| ARFGEF2  | 3 |
| ARFIP1   | 3 |
| ARHGAP44 | 3 |
| ARHGEF12 | 3 |
| ARID2    | 3 |
| ARMC1    | 3 |
| ARMC8    | 3 |
| ARRDC3   | 3 |
| ARRDC4   | 3 |
| ASAP1    | 3 |
| ASCC1    | 3 |
| ASXL3    | 3 |
| ATF7IP   | 3 |
| ATG7     | 3 |
| ATL3     | 3 |
| ATP2B1   | 3 |
| ATRX     | 3 |
| ATXN7L1  | 3 |
| ATXN7L3B | 3 |
| AVL9     | 3 |
| B3GALNT2 | 3 |
| B3GNT1   | 3 |
| BACE2    | 3 |
| BCAS3    | 3 |
| BCKDK    | 3 |
| BCL2     | 3 |
| BCL7A    | 3 |
| BOD1L1   | 3 |

|           |   |
|-----------|---|
| BSND      | 3 |
| BTF3L4    | 3 |
| BTG2      | 3 |
| C11orf30  | 3 |
| C11orf57  | 3 |
| C16orf52  | 3 |
| C17orf85  | 3 |
| C1orf95   | 3 |
| C20orf112 | 3 |
| C21orf91  | 3 |
| C2CD5     | 3 |
| C2orf69   | 3 |
| C6orf211  | 3 |
| C7orf41   | 3 |
| C8orf58   | 3 |
| CADM1     | 3 |
| CALD1     | 3 |
| CAMSAP1   | 3 |
| CAPRIN1   | 3 |
| CAPRIN2   | 3 |
| CBX2      | 3 |
| CCDC117   | 3 |
| CCDC6     | 3 |
| CCND1     | 3 |
| CCNY      | 3 |
| CD164     | 3 |
| CD2AP     | 3 |
| CDC42BPA  | 3 |
| CDC42SE1  | 3 |
| CDYL      | 3 |
| CELSR3    | 3 |
| CEP135    | 3 |
| CEP350    | 3 |
| CEP41     | 3 |
| CEP85L    | 3 |
| CHD9      | 3 |
| CHRM3     | 3 |
| CHST1     | 3 |

|          |   |
|----------|---|
| CHST7    | 3 |
| CLIP1    | 3 |
| CNBP     | 3 |
| CNOT7    | 3 |
| COL1A2   | 3 |
| CPOX     | 3 |
| CREB1    | 3 |
| CREB3L2  | 3 |
| CREBZF   | 3 |
| CRKL     | 3 |
| CRY2     | 3 |
| CSNK1G1  | 3 |
| CSNK2A1  | 3 |
| CTDNEP1  | 3 |
| CTIF     | 3 |
| DAG1     | 3 |
| DAGLA    | 3 |
| DAZAP1   | 3 |
| DBN1     | 3 |
| DBNL     | 3 |
| DCAF12   | 3 |
| DDN      | 3 |
| DENND5B  | 3 |
| DERL1    | 3 |
| DESI2    | 3 |
| DHX30    | 3 |
| DHX40    | 3 |
| DKK3     | 3 |
| DLG2     | 3 |
| DLX1     | 3 |
| DMXL2    | 3 |
| DNAH10OS | 3 |
| DNAH3    | 3 |
| DNAJB9   | 3 |
| DNAJC16  | 3 |
| DNAJC3   | 3 |
| DOCK3    | 3 |
| DOCK4    | 3 |

|          |   |
|----------|---|
| DUSP1    | 3 |
| DUSP22   | 3 |
| DUSP7    | 3 |
| DYRK1A   | 3 |
| E2F5     | 3 |
| EBF3     | 3 |
| EDNRB    | 3 |
| EFNA5    | 3 |
| EIF3J    | 3 |
| EIF4G2   | 3 |
| EIF5     | 3 |
| EIF5A2   | 3 |
| ELL      | 3 |
| ENTPD6   | 3 |
| EPHA3    | 3 |
| ERBB4    | 3 |
| EREG     | 3 |
| ESR1     | 3 |
| ESRRG    | 3 |
| ETNK2    | 3 |
| ETV1     | 3 |
| EVX1     | 3 |
| EXO1     | 3 |
| EXT1     | 3 |
| EYA4     | 3 |
| FAM104A  | 3 |
| FAM126B  | 3 |
| FAM134B  | 3 |
| FAM135A  | 3 |
| FAM155A  | 3 |
| FAM160B2 | 3 |
| FAM188A  | 3 |
| FAM46C   | 3 |
| FAM49B   | 3 |
| FAM73A   | 3 |
| FAM78A   | 3 |
| FAM83G   | 3 |
| FARP1    | 3 |



|        |   |
|--------|---|
| FAS    | 3 |
| FASLG  | 3 |
| FASTK  | 3 |
| FAT3   | 3 |
| FBXL19 | 3 |
| FBXO28 | 3 |
| FBXO32 | 3 |
| FBXO33 | 3 |
| FBXO42 | 3 |
| FBXO45 | 3 |
| FBXW11 | 3 |
| FEM1C  | 3 |
| FGF11  | 3 |
| FKBP5  | 3 |
| FLNB   | 3 |
| FLNC   | 3 |
| FMNL3  | 3 |
| FOSL2  | 3 |
| FOXQ1  | 3 |
| FRAS1  | 3 |
| FREM2  | 3 |
| FRMD5  | 3 |
| G3BP1  | 3 |
| GAB2   | 3 |
| GABBR2 | 3 |
| GABRA1 | 3 |
| GABRA4 | 3 |
| GALNT2 | 3 |
| GALNT4 | 3 |
| GAPVD1 | 3 |
| GAREM  | 3 |
| GDF6   | 3 |
| GDPD1  | 3 |
| GFPT1  | 3 |
| GHITM  | 3 |
| GHR    | 3 |
| GJA9   | 3 |
| GLIS3  | 3 |

|         |   |
|---------|---|
| GLRA3   | 3 |
| GNB4    | 3 |
| GOLGA1  | 3 |
| GOT2    | 3 |
| GPC4    | 3 |
| GPD1L   | 3 |
| GPR137C | 3 |
| GRIK2   | 3 |
| GRIK3   | 3 |
| GRM5    | 3 |
| GSKIP   | 3 |
| GSPT1   | 3 |
| HAND2   | 3 |
| HAPLN1  | 3 |
| HAS3    | 3 |
| HBEGF   | 3 |
| HDLBP   | 3 |
| HECA    | 3 |
| HECW2   | 3 |
| HEY2    | 3 |
| HIF1A   | 3 |
| HIP1    | 3 |
| HLTF    | 3 |
| HNRNPF  | 3 |
| HOMER1  | 3 |
| HOXB4   | 3 |
| HS6ST1  | 3 |
| IDH2    | 3 |
| IFFO2   | 3 |
| IGSF3   | 3 |
| ING5    | 3 |
| INO80   | 3 |
| INPP5A  | 3 |
| INSIG1  | 3 |
| IPMK    | 3 |
| IPO9    | 3 |
| IRS2    | 3 |
| JMJD1C  | 3 |

|           |   |
|-----------|---|
| KAT6B     | 3 |
| KAT7      | 3 |
| KATNAL1   | 3 |
| KATNBL1   | 3 |
| KCNA4     | 3 |
| KCNC4     | 3 |
| KCNJ15    | 3 |
| KCNJ2     | 3 |
| KCNK10    | 3 |
| KCNK2     | 3 |
| KCNK6     | 3 |
| KCNQ5     | 3 |
| KCNV1     | 3 |
| KCTD10    | 3 |
| KCTD21    | 3 |
| KHNYN     | 3 |
| KIAA0226  | 3 |
| KIAA1211  | 3 |
| KIAA1239  | 3 |
| KIAA1324  | 3 |
| KIAA1549L | 3 |
| KIAA1598  | 3 |
| KIF21B    | 3 |
| KIF2A     | 3 |
| KIF3B     | 3 |
| KITLG     | 3 |
| KLHDC10   | 3 |
| KLHL13    | 3 |
| KLHL14    | 3 |
| KLHL31    | 3 |
| KLHL42    | 3 |
| KPNA3     | 3 |
| KPNB1     | 3 |
| KREMEN1   | 3 |
| LAMC1     | 3 |
| LBH       | 3 |
| LIMD1     | 3 |
| LIMK2     | 3 |

|          |   |
|----------|---|
| LIPT2    | 3 |
| LMO3     | 3 |
| LONRF3   | 3 |
| LPPR1    | 3 |
| LRIG3    | 3 |
| LRP12    | 3 |
| LRP6     | 3 |
| LRRC4    | 3 |
| LRRC8B   | 3 |
| LRRFIP1  | 3 |
| LUZP1    | 3 |
| LYVE1    | 3 |
| LZIC     | 3 |
| MAP1LC3B | 3 |
| MAP3K1   | 3 |
| MAP3K9   | 3 |
| MAP4K3   | 3 |
| MAP4K4   | 3 |
| MAPK6    | 3 |
| MARK4    | 3 |
| MASTL    | 3 |
| MBD6     | 3 |
| MCC      | 3 |
| MED16    | 3 |
| MED8     | 3 |
| MEX3B    | 3 |
| MGA      | 3 |
| MGAT2    | 3 |
| MGAT4A   | 3 |
| MLLT10   | 3 |
| MLXIP    | 3 |
| MN1      | 3 |
| MOB3C    | 3 |
| MON2     | 3 |
| MORC3    | 3 |
| MTMR3    | 3 |
| MTUS1    | 3 |
| MYCBP    | 3 |

|         |   |
|---------|---|
| MYO1D   | 3 |
| N4BP3   | 3 |
| NAT8L   | 3 |
| NAV3    | 3 |
| NCALD   | 3 |
| NCOA1   | 3 |
| NDST1   | 3 |
| NEFM    | 3 |
| NEGR1   | 3 |
| NEUROD1 | 3 |
| NFAT5   | 3 |
| NFATC2  | 3 |
| NFIX    | 3 |
| NGF     | 3 |
| NHLRC3  | 3 |
| NIPA1   | 3 |
| NMT2    | 3 |
| NPAS2   | 3 |
| NPEPL1  | 3 |
| NPTXR   | 3 |
| NR2C2   | 3 |
| NR3C1   | 3 |
| NRN1    | 3 |
| NSD1    | 3 |
| NTN1    | 3 |
| NUAK1   | 3 |
| NUDT21  | 3 |
| NUMBL   | 3 |
| NUP155  | 3 |
| NUS1    | 3 |
| OGT     | 3 |
| ORC2    | 3 |
| PAK7    | 3 |
| PAWR    | 3 |
| PCDH10  | 3 |
| PCDH1   | 3 |
| PCSK1   | 3 |
| PCYOX1  | 3 |

|              |   |
|--------------|---|
| PDCD4        | 3 |
| PDE10A       | 3 |
| PDE3B        | 3 |
| PDE4D        | 3 |
| PDE5A        | 3 |
| PDP2         | 3 |
| PEG10        | 3 |
| PFKM         | 3 |
| PGR          | 3 |
| PHACTR2      | 3 |
| PHACTR4      | 3 |
| PHF13        | 3 |
| PHLPP2       | 3 |
| PHOX2B       | 3 |
| PHTF2        | 3 |
| PI15         | 3 |
| PI4K2B       | 3 |
| PIK3CB       | 3 |
| PIK3IP1      | 3 |
| PIK3R1       | 3 |
| PIK3R3       | 3 |
| PKDCC        | 3 |
| PKIA         | 3 |
| PLCG1        | 3 |
| PLCL2        | 3 |
| PLCXD3       | 3 |
| PLK3         | 3 |
| PMEPA1       | 3 |
| POC1B-GALNT4 | 3 |
| POLR3D       | 3 |
| PPM1A        | 3 |
| PPP1CB       | 3 |
| PPP1R11      | 3 |
| PPP1R12A     | 3 |
| PPP1R3E      | 3 |
| PPP2R2C      | 3 |
| PPP2R5E      | 3 |
| PPP3CA       | 3 |

|               |   |
|---------------|---|
| PPP4R2        | 3 |
| PPTC7         | 3 |
| PRICKLE2      | 3 |
| PRKG1         | 3 |
| PRRX1         | 3 |
| PRUNE2        | 3 |
| PTGER3        | 3 |
| RAB11A        | 3 |
| RAB15         | 3 |
| RAB18         | 3 |
| RAB22A        | 3 |
| RAB3C         | 3 |
| RAB5B         | 3 |
| RAC1          | 3 |
| RAD51         | 3 |
| RAD51L3-RFFL  | 3 |
| RAI2          | 3 |
| RALB          | 3 |
| RAP2B         | 3 |
| RAPGEFL1      | 3 |
| RARG          | 3 |
| RASAL2        | 3 |
| RASSF8        | 3 |
| RAVER2        | 3 |
| RBFOX2        | 3 |
| RBMS1         | 3 |
| RBMS3         | 3 |
| RCN2          | 3 |
| RDX           | 3 |
| RFFL          | 3 |
| RGS5          | 3 |
| RHPN2         | 3 |
| RLIM          | 3 |
| RNF11         | 3 |
| RNF145        | 3 |
| RORB          | 3 |
| RP11-766F14.2 | 3 |
| RPRD2         | 3 |

|          |   |
|----------|---|
| RPS24    | 3 |
| RPS6KA3  | 3 |
| RPS6KA6  | 3 |
| RPS6KB1  | 3 |
| RRP8     | 3 |
| RSPO2    | 3 |
| RSU1     | 3 |
| RTKN2    | 3 |
| RUNX1    | 3 |
| RXRA     | 3 |
| SALL3    | 3 |
| SAP30L   | 3 |
| SATB2    | 3 |
| SBK1     | 3 |
| SBNO1    | 3 |
| SCAI     | 3 |
| SCD      | 3 |
| SCML2    | 3 |
| SCN3A    | 3 |
| SCN4B    | 3 |
| SCOC     | 3 |
| SCRT2    | 3 |
| SEC63    | 3 |
| SEMA4F   | 3 |
| SERINC3  | 3 |
| SERTAD2  | 3 |
| SF3B3    | 3 |
| SGCB     | 3 |
| SGMS2    | 3 |
| SH3RF3   | 3 |
| SHC3     | 3 |
| SKAP2    | 3 |
| SLC16A7  | 3 |
| SLC16A9  | 3 |
| SLC22A23 | 3 |
| SLC22A3  | 3 |
| SLC25A24 | 3 |
| SLC25A4  | 3 |

|          |   |
|----------|---|
| SLC25A51 | 3 |
| SLC35F1  | 3 |
| SLC48A1  | 3 |
| SLC5A6   | 3 |
| SLC6A8   | 3 |
| SLC7A6OS | 3 |
| SLITRK3  | 3 |
| SMAD2    | 3 |
| SMARCD2  | 3 |
| SMARCE1  | 3 |
| SMG1     | 3 |
| SMG7     | 3 |
| SMIM13   | 3 |
| SMIM3    | 3 |
| SNAP23   | 3 |
| SNX1     | 3 |
| SOCS1    | 3 |
| SOCS7    | 3 |
| SOST     | 3 |
| SOWAHA   | 3 |
| SPIN1    | 3 |
| SPRED3   | 3 |
| SPRY4    | 3 |
| SPTLC2   | 3 |
| SPTSSA   | 3 |
| SRGAP1   | 3 |
| SRGAP3   | 3 |
| SRPK2    | 3 |
| SRPX2    | 3 |
| SS18L1   | 3 |
| SSBP2    | 3 |
| ST8SIA4  | 3 |
| STAT3    | 3 |
| STX17    | 3 |
| STXBP5   | 3 |
| SULF1    | 3 |
| SV2C     | 3 |
| SYNGR2   | 3 |

|          |   |
|----------|---|
| SYNM     | 3 |
| SYT2     | 3 |
| TAF4     | 3 |
| TAF9B    | 3 |
| TBR1     | 3 |
| TCERG1   | 3 |
| TECPR2   | 3 |
| TFCP2L1  | 3 |
| THSD7A   | 3 |
| TIPARP   | 3 |
| TLK2     | 3 |
| TMEM110  | 3 |
| TMEM135  | 3 |
| TMEM136  | 3 |
| TMEM167B | 3 |
| TMEM47   | 3 |
| TMEM50B  | 3 |
| TMOD2    | 3 |
| TNFAIP3  | 3 |
| TNFRSF1B | 3 |
| TNFSF9   | 3 |
| TNKS2    | 3 |
| TNS3     | 3 |
| TPD52    | 3 |
| TRANK1   | 3 |
| TRIM13   | 3 |
| TRIM8    | 3 |
| TRIOBP   | 3 |
| TRPC4AP  | 3 |
| TRPM3    | 3 |
| TSHZ3    | 3 |
| TSPAN14  | 3 |
| TSPAN18  | 3 |
| TUSC3    | 3 |
| TXLNA    | 3 |
| TXLNG    | 3 |
| UHRF2    | 3 |
| ULK2     | 3 |

|         |   |
|---------|---|
| UNC5A   | 3 |
| USP12   | 3 |
| USP24   | 3 |
| USP47   | 3 |
| USP6    | 3 |
| VAMP3   | 3 |
| VANGL1  | 3 |
| VAT1L   | 3 |
| VPS26B  | 3 |
| VPS37B  | 3 |
| VSTM4   | 3 |
| WAC     | 3 |
| WAPAL   | 3 |
| WDR1    | 3 |
| WDR37   | 3 |
| WHAMM   | 3 |
| WIPF2   | 3 |
| WNT1    | 3 |
| WNT9A   | 3 |
| WRNIP1  | 3 |
| XPR1    | 3 |
| XRN1    | 3 |
| YBX2    | 3 |
| YIPF5   | 3 |
| YTHDF3  | 3 |
| YWHAE   | 3 |
| YWHAZ   | 3 |
| ZBTB18  | 3 |
| ZBTB39  | 3 |
| ZBTB41  | 3 |
| ZBTB8A  | 3 |
| ZBTB8B  | 3 |
| ZC3H10  | 3 |
| ZCCHC11 | 3 |
| ZCCHC14 | 3 |
| ZCCHC3  | 3 |
| ZDHHC21 | 3 |
| ZDHHC3  | 3 |

|            |   |
|------------|---|
| ZFAND5     | 3 |
| ZFP91      | 3 |
| ZFYVE26    | 3 |
| ZMAT3      | 3 |
| ZMYM4      | 3 |
| ZNF217     | 3 |
| ZNF451     | 3 |
| ZNF594     | 3 |
| ZNF654     | 3 |
| ZNF664     | 3 |
| ZNF70      | 3 |
| ZNF740     | 3 |
| ZNRF2      | 3 |
| ZPLD1      | 3 |
| A1CF       | 2 |
| AASS       | 2 |
| ABCC10     | 2 |
| ABCC5      | 2 |
| ABCG1      | 2 |
| ABI2       | 2 |
| AC008443.1 | 2 |
| AC012123.1 | 2 |
| AC012215.1 | 2 |
| AC023632.1 | 2 |
| AC068987.1 | 2 |
| ACADSB     | 2 |
| ACAN       | 2 |
| ACAP3      | 2 |
| ACBD5      | 2 |
| ACPP       | 2 |
| ACSBG1     | 2 |
| ACSS1      | 2 |
| ADAM11     | 2 |
| ADAM12     | 2 |
| ADAM15     | 2 |
| ADAM19     | 2 |
| ADAMTS8    | 2 |
| ADAT2      | 2 |

|            |   |
|------------|---|
| ADCYAP1    | 2 |
| ADD2       | 2 |
| ADK        | 2 |
| ADO        | 2 |
| ADRB2      | 2 |
| ADRB3      | 2 |
| ADRBK2     | 2 |
| AEBP2      | 2 |
| AFF2       | 2 |
| AFTPH      | 2 |
| AGAP1      | 2 |
| AGPAT6     | 2 |
| AHCTF1     | 2 |
| AIF1L      | 2 |
| AIM1       | 2 |
| AJUBA      | 2 |
| AK4        | 2 |
| AKAP6      | 2 |
| AKT2       | 2 |
| AL020996.1 | 2 |
| AL161915.1 | 2 |
| ALKBH1     | 2 |
| ALKBH5     | 2 |
| ALPK3      | 2 |
| AMER3      | 2 |
| AMOT       | 2 |
| AMOTL2     | 2 |
| AMT        | 2 |
| ANK3       | 2 |
| ANKH       | 2 |
| ANKIB1     | 2 |
| ANKRD13A   | 2 |
| ANKRD28    | 2 |
| ANKRD44    | 2 |
| ANKRD46    | 2 |
| AP1S1      | 2 |
| AP5M1      | 2 |
| APBB3      | 2 |

|          |   |
|----------|---|
| APC2     | 2 |
| APPBP2   | 2 |
| APPL1    | 2 |
| AREL1    | 2 |
| ARF4     | 2 |
| ARFGEF1  | 2 |
| ARG2     | 2 |
| ARHGAP20 | 2 |
| ARHGAP28 | 2 |
| ARHGEF15 | 2 |
| ARHGEF3  | 2 |
| ARHGEF38 | 2 |
| ARHGEF39 | 2 |
| ARHGEF7  | 2 |
| ARL4D    | 2 |
| ARL6IP6  | 2 |
| ARL8B    | 2 |
| ARMCX2   | 2 |
| ARSJ     | 2 |
| ASAH2    | 2 |
| ASAH2B   | 2 |
| ASCC2    | 2 |
| ASH2L    | 2 |
| ASS1     | 2 |
| ASTN1    | 2 |
| ATF2     | 2 |
| ATG4B    | 2 |
| ATP1B1   | 2 |
| ATP2B3   | 2 |
| ATP2B4   | 2 |
| ATP6V1C1 | 2 |
| ATP8A1   | 2 |
| ATP8B2   | 2 |
| ATP8B4   | 2 |
| ATPAF1   | 2 |
| B3GALT5  | 2 |
| B3GAT1   | 2 |
| B3GAT3   | 2 |

|          |   |
|----------|---|
| BACE1    | 2 |
| BACH2    | 2 |
| BAG4     | 2 |
| BAI3     | 2 |
| BAK1     | 2 |
| BANP     | 2 |
| BAZ2A    | 2 |
| BBC3     | 2 |
| BBX      | 2 |
| BCL10    | 2 |
| BCL2L1   | 2 |
| BCL2L12  | 2 |
| BCLAF1   | 2 |
| BEGAIN   | 2 |
| BHLHE22  | 2 |
| BICD1    | 2 |
| BIN3     | 2 |
| BIRC6    | 2 |
| BLOC1S5  | 2 |
| BMF      | 2 |
| BMI1     | 2 |
| BMP2     | 2 |
| BMP3     | 2 |
| BMP5     | 2 |
| BMP6     | 2 |
| BOD1L2   | 2 |
| BRD1     | 2 |
| BRPF3    | 2 |
| BTAF1    | 2 |
| BTBD7    | 2 |
| BTBD9    | 2 |
| BTG1     | 2 |
| BZW2     | 2 |
| C11orf84 | 2 |
| C12orf36 | 2 |
| C15orf39 | 2 |
| C15orf41 | 2 |
| C15orf61 | 2 |

|                |   |
|----------------|---|
| C16orf70       | 2 |
| C19orf47       | 2 |
| C1orf147       | 2 |
| C2orf88        | 2 |
| C3orf14        | 2 |
| C3orf52        | 2 |
| C5orf30        | 2 |
| C5orf51        | 2 |
| C6orf203       | 2 |
| C7orf55-LUC7L2 | 2 |
| C7orf60        | 2 |
| C8orf44-SGK3   | 2 |
| C9orf40        | 2 |
| C9orf41        | 2 |
| CA12           | 2 |
| CAB39          | 2 |
| CACFD1         | 2 |
| CACNA1I        | 2 |
| CACNA2D1       | 2 |
| CACNA2D2       | 2 |
| CACNG2         | 2 |
| CACNG4         | 2 |
| CACUL1         | 2 |
| CADM3          | 2 |
| CALCR          | 2 |
| CALM3          | 2 |
| CALU           | 2 |
| CAMK2N1        | 2 |
| CAND1          | 2 |
| CANT1          | 2 |
| CAPN3          | 2 |
| CAPN7          | 2 |
| CARD10         | 2 |
| CASK           | 2 |
| CASKIN1        | 2 |
| CASP2          | 2 |
| CASP3          | 2 |
| CASP5          | 2 |



|         |   |
|---------|---|
| CASP9   | 2 |
| CBFA2T2 | 2 |
| CBLB    | 2 |
| CBX6    | 2 |
| CCDC64B | 2 |
| CCDC71L | 2 |
| CCDC80  | 2 |
| CCDC88A | 2 |
| CCDC92  | 2 |
| CCDC93  | 2 |
| CCL3    | 2 |
| CCL3L1  | 2 |
| CCL3L3  | 2 |
| CCL7    | 2 |
| CCNF    | 2 |
| CCNJL   | 2 |
| CCSAP   | 2 |
| CCSER1  | 2 |
| CCSER2  | 2 |
| CD200R1 | 2 |
| CD274   | 2 |
| CD86    | 2 |
| CD97    | 2 |
| CDC25A  | 2 |
| CDC27   | 2 |
| CDCA8   | 2 |
| CDH2    | 2 |
| CDH22   | 2 |
| CDH7    | 2 |
| CDK14   | 2 |
| CDKN1A  | 2 |
| CDS1    | 2 |
| CDS2    | 2 |
| CDX2    | 2 |
| CEBPD   | 2 |
| CELF2   | 2 |
| CELSR1  | 2 |
| CELSR2  | 2 |

|          |   |
|----------|---|
| CENPF    | 2 |
| CENPP    | 2 |
| CEP164   | 2 |
| CERCAM   | 2 |
| CGNL1    | 2 |
| CHD2     | 2 |
| CHD4     | 2 |
| CHD5     | 2 |
| CHEK1    | 2 |
| CHGA     | 2 |
| CHMP1B   | 2 |
| CHRD     | 2 |
| CHRFAM7A | 2 |
| CHRNA7   | 2 |
| CHST11   | 2 |
| CHST8    | 2 |
| CHTF8    | 2 |
| CHUK     | 2 |
| CISD1    | 2 |
| CISD2    | 2 |
| CKAP5    | 2 |
| CLASP2   | 2 |
| CLCN6    | 2 |
| CLDN12   | 2 |
| CLIP4    | 2 |
| CLP1     | 2 |
| CLPB     | 2 |
| CMPK1    | 2 |
| CMTM4    | 2 |
| CMTM6    | 2 |
| CNGA3    | 2 |
| CNNM3    | 2 |
| CNPY4    | 2 |
| CNR1     | 2 |
| CNTFR    | 2 |
| CNTRL    | 2 |
| COIL     | 2 |
| COL11A1  | 2 |

|              |   |
|--------------|---|
| COL14A1      | 2 |
| COL15A1      | 2 |
| COL1A1       | 2 |
| COL24A1      | 2 |
| COL3A1       | 2 |
| COL4A1       | 2 |
| COL4A2       | 2 |
| COL4A3BP     | 2 |
| COL4A5       | 2 |
| COL4A6       | 2 |
| COL5A1       | 2 |
| COL5A2       | 2 |
| COL9A1       | 2 |
| COL9A3       | 2 |
| COLEC10      | 2 |
| COMMD3-BMI1  | 2 |
| COPS7B       | 2 |
| CORO1C       | 2 |
| CPA4         | 2 |
| CPED1        | 2 |
| CPM          | 2 |
| CPSF4        | 2 |
| CRB2         | 2 |
| CRBN         | 2 |
| CRCT1        | 2 |
| CREB3L1      | 2 |
| CRISPLD2     | 2 |
| CRNKL1       | 2 |
| CRTAP        | 2 |
| CRTC1        | 2 |
| CSE1L        | 2 |
| CSF1R        | 2 |
| CTC-432M15.3 | 2 |
| CTDSPL       | 2 |
| CTNS         | 2 |
| CTTN         | 2 |
| CTTNBP2NL    | 2 |
| CUL3         | 2 |

|               |   |
|---------------|---|
| CXorf36       | 2 |
| CYBRD1        | 2 |
| CYP19A1       | 2 |
| CYP46A1       | 2 |
| CYTH1         | 2 |
| DAB2          | 2 |
| DAP           | 2 |
| DAPK1         | 2 |
| DARS2         | 2 |
| DAZAP2        | 2 |
| DCAF15        | 2 |
| DCAF16        | 2 |
| DCC           | 2 |
| DCLK3         | 2 |
| DCP2          | 2 |
| DCUN1D2       | 2 |
| DDHD1         | 2 |
| DDX19A        | 2 |
| DDX19B        | 2 |
| DDX26B        | 2 |
| DDX42         | 2 |
| DDX6          | 2 |
| DENND2C       | 2 |
| DEPTOR        | 2 |
| DERL3         | 2 |
| DGCR2         | 2 |
| DHDDS         | 2 |
| DHX15         | 2 |
| DHX33         | 2 |
| DHX57         | 2 |
| DIEXF         | 2 |
| DIP2A         | 2 |
| DIXDC1        | 2 |
| DKFZP761J1410 | 2 |
| DLG5          | 2 |
| DLK1          | 2 |
| DLST          | 2 |
| DMP1          | 2 |

|         |   |
|---------|---|
| DNA2    | 2 |
| DNAJB1  | 2 |
| DNAJB12 | 2 |
| DNAJC10 | 2 |
| DNER    | 2 |
| DOCK10  | 2 |
| DOCK11  | 2 |
| DOK6    | 2 |
| DPF2    | 2 |
| DPH1    | 2 |
| DPH3    | 2 |
| DPP3    | 2 |
| DPY30   | 2 |
| DPYSL5  | 2 |
| DSCAM   | 2 |
| DSG3    | 2 |
| DUSP4   | 2 |
| DUSP9   | 2 |
| DYNLL2  | 2 |
| DZIP1   | 2 |
| E2F1    | 2 |
| E2F6    | 2 |
| EBF1    | 2 |
| EBF2    | 2 |
| EDEM3   | 2 |
| EDN1    | 2 |
| EEF2K   | 2 |
| EFHD2   | 2 |
| EFNA3   | 2 |
| EFS     | 2 |
| EGLN2   | 2 |
| EIF2B1  | 2 |
| EIF2B2  | 2 |
| EIF2S2  | 2 |
| EIF4A2  | 2 |
| EIF4B   | 2 |
| EIF4E3  | 2 |
| EIF5B   | 2 |

|          |   |
|----------|---|
| ELAVL2   | 2 |
| ELAVL4   | 2 |
| ELF4     | 2 |
| ELK4     | 2 |
| ELOVL4   | 2 |
| ELOVL6   | 2 |
| EMILIN2  | 2 |
| EML5     | 2 |
| EMX2     | 2 |
| ENPEP    | 2 |
| ENTPD4   | 2 |
| ENTPD7   | 2 |
| EOMES    | 2 |
| EPC2     | 2 |
| EPHA7    | 2 |
| EPOR     | 2 |
| EPT1     | 2 |
| ERBB3    | 2 |
| ERCC4    | 2 |
| ERCC6    | 2 |
| ERF      | 2 |
| ERG      | 2 |
| ERGIC1   | 2 |
| ERGIC2   | 2 |
| ERN1     | 2 |
| ESPL1    | 2 |
| ETFA     | 2 |
| ETS2     | 2 |
| ETV5     | 2 |
| EVI5L    | 2 |
| EZH1     | 2 |
| FADS3    | 2 |
| FAM102A  | 2 |
| FAM103A1 | 2 |
| FAM135B  | 2 |
| FAM149B1 | 2 |
| FAM155B  | 2 |
| FAM160A1 | 2 |

|          |   |
|----------|---|
| FAM168B  | 2 |
| FAM171A1 | 2 |
| FAM189A1 | 2 |
| FAM199X  | 2 |
| FAM204A  | 2 |
| FAM20B   | 2 |
| FAM214B  | 2 |
| FAM46A   | 2 |
| FAM73B   | 2 |
| FAM84B   | 2 |
| FANCF    | 2 |
| FBXO21   | 2 |
| FBXO30   | 2 |
| FBXO34   | 2 |
| FBXO41   | 2 |
| FBXO48   | 2 |
| FBXW7    | 2 |
| FGD4     | 2 |
| FGD6     | 2 |
| FGF5     | 2 |
| FGFR3    | 2 |
| FICD     | 2 |
| FKBP15   | 2 |
| FKRP     | 2 |
| FLRT3    | 2 |
| FLT1     | 2 |
| FNBP1L   | 2 |
| FNIP1    | 2 |
| FOPNL    | 2 |
| FOXF2    | 2 |
| FOXM1    | 2 |
| FOXO3    | 2 |
| FRK      | 2 |
| FRMPD4   | 2 |
| FRYL     | 2 |
| FSTL4    | 2 |
| FTL      | 2 |
| FURIN    | 2 |

|         |   |
|---------|---|
| FUS     | 2 |
| FZD4    | 2 |
| FZD8    | 2 |
| G3BP2   | 2 |
| GABPA   | 2 |
| GABPB2  | 2 |
| GABRA6  | 2 |
| GALC    | 2 |
| GALE    | 2 |
| GALNT15 | 2 |
| GATAD2B | 2 |
| GATM    | 2 |
| GDAP1   | 2 |
| GDAP2   | 2 |
| GDF11   | 2 |
| GEMIN7  | 2 |
| GGA1    | 2 |
| GGCX    | 2 |
| GIPC1   | 2 |
| GIT2    | 2 |
| GJA1    | 2 |
| GJD2    | 2 |
| GLB1L   | 2 |
| GLCCI1  | 2 |
| GLRX    | 2 |
| GMCL1   | 2 |
| GMEB1   | 2 |
| GMPPB   | 2 |
| GMPS    | 2 |
| GNAI1   | 2 |
| GNE     | 2 |
| GNG5    | 2 |
| GNPTAB  | 2 |
| GNPTG   | 2 |
| GOLGA3  | 2 |
| GOLGA4  | 2 |
| GOLGA7  | 2 |
| GOLT1B  | 2 |

|         |   |
|---------|---|
| GOPC    | 2 |
| GPATCH3 | 2 |
| GPR107  | 2 |
| GPR132  | 2 |
| GPR135  | 2 |
| GPR137  | 2 |
| GPR156  | 2 |
| GPR157  | 2 |
| GPR26   | 2 |
| GPR63   | 2 |
| GPR75   | 2 |
| GPR88   | 2 |
| GPRIN3  | 2 |
| GRASP   | 2 |
| GRB10   | 2 |
| GREB1   | 2 |
| GRHL2   | 2 |
| GRID1   | 2 |
| GRID2IP | 2 |
| GRIN3A  | 2 |
| GRM1    | 2 |
| GRM4    | 2 |
| GRPEL2  | 2 |
| GSC     | 2 |
| GSG1L   | 2 |
| GTF2A1  | 2 |
| GTF2I   | 2 |
| GTPBP1  | 2 |
| GTPBP2  | 2 |
| GTPBP8  | 2 |
| GUCY1A2 | 2 |
| GYG2    | 2 |
| H2AFX   | 2 |
| H3F3B   | 2 |
| HABP4   | 2 |
| HAND1   | 2 |
| HBP1    | 2 |
| HDAC7   | 2 |

|            |   |
|------------|---|
| HDAC9      | 2 |
| HDHD1      | 2 |
| HDX        | 2 |
| HECTD4     | 2 |
| HEG1       | 2 |
| HEPHL1     | 2 |
| HERPUD1    | 2 |
| HEY1       | 2 |
| HGF        | 2 |
| HID1       | 2 |
| HIPK1      | 2 |
| HIPK3      | 2 |
| HIVEP2     | 2 |
| HK2        | 2 |
| HLCS       | 2 |
| HMGA1      | 2 |
| HNRNPC     | 2 |
| HNRNPUL1   | 2 |
| HOOK1      | 2 |
| HOXA10     | 2 |
| HOXB1      | 2 |
| HOXC11     | 2 |
| HOXC8      | 2 |
| HRK        | 2 |
| HSPA4      | 2 |
| HSPB3      | 2 |
| HSPBAP1    | 2 |
| HSPE1-MOB4 | 2 |
| HSPH1      | 2 |
| HTR1E      | 2 |
| HUNK       | 2 |
| ICK        | 2 |
| ICMT       | 2 |
| ICOS       | 2 |
| IDE        | 2 |
| IFT57      | 2 |
| IGDCC4     | 2 |
| IGLON5     | 2 |

|          |   |
|----------|---|
| IGSF10   | 2 |
| IGSF1    | 2 |
| IKBKAP   | 2 |
| IKBKE    | 2 |
| IKZF2    | 2 |
| IKZF3    | 2 |
| IL10     | 2 |
| IL13     | 2 |
| IL1A     | 2 |
| IL1R1    | 2 |
| IL6ST    | 2 |
| ILDR2    | 2 |
| IMPDH1   | 2 |
| INHBA    | 2 |
| INSIG2   | 2 |
| INSM2    | 2 |
| INSR     | 2 |
| INTS2    | 2 |
| INTU     | 2 |
| INVS     | 2 |
| IPO11    | 2 |
| IPO7     | 2 |
| IPPK     | 2 |
| IQCB1    | 2 |
| IQSEC2   | 2 |
| IRAK2    | 2 |
| IREB2    | 2 |
| IRGQ     | 2 |
| ISL2     | 2 |
| ISLR     | 2 |
| ITGA6    | 2 |
| ITPA     | 2 |
| IVNS1ABP | 2 |
| JAKMIP3  | 2 |
| JARID2   | 2 |
| JOSD1    | 2 |
| KCNA6    | 2 |
| KCNAB1   | 2 |

|           |   |
|-----------|---|
| KCNB1     | 2 |
| KCNC1     | 2 |
| KCNC2     | 2 |
| KCNH1     | 2 |
| KCNH5     | 2 |
| KCNJ11    | 2 |
| KCNJ3     | 2 |
| KCNK1     | 2 |
| KCNN3     | 2 |
| KCNQ4     | 2 |
| KCNS2     | 2 |
| KCNS3     | 2 |
| KCTD15    | 2 |
| KCTD17    | 2 |
| KCTD2     | 2 |
| KCTD9     | 2 |
| KDM2A     | 2 |
| KDM2B     | 2 |
| KDM3A     | 2 |
| KDM6A     | 2 |
| KDSR      | 2 |
| KIAA0087  | 2 |
| KIAA0141  | 2 |
| KIAA0195  | 2 |
| KIAA0355  | 2 |
| KIAA0368  | 2 |
| KIAA0391  | 2 |
| KIAA0895L | 2 |
| KIAA0930  | 2 |
| KIAA1147  | 2 |
| KIAA1161  | 2 |
| KIAA1217  | 2 |
| KIAA1324L | 2 |
| KIAA1462  | 2 |
| KIAA1467  | 2 |
| KIAA1644  | 2 |
| KIAA1919  | 2 |
| KIAA2018  | 2 |

|         |   |
|---------|---|
| KIF14   | 2 |
| KIF3A   | 2 |
| KIN     | 2 |
| KLC2    | 2 |
| KLF15   | 2 |
| KLF5    | 2 |
| KLF9    | 2 |
| KLHDC8B | 2 |
| KLHDC9  | 2 |
| KLHL18  | 2 |
| KLHL2   | 2 |
| KLHL23  | 2 |
| KLHL28  | 2 |
| KLHL5   | 2 |
| KLHL6   | 2 |
| KLK10   | 2 |
| KLLN    | 2 |
| KMT2C   | 2 |
| KMT2D   | 2 |
| KNSTRN  | 2 |
| KPNA5   | 2 |
| KPNA6   | 2 |
| KRBOX4  | 2 |
| KRI1    | 2 |
| KRIT1   | 2 |
| L1CAM   | 2 |
| L2HGDH  | 2 |
| LAGE3   | 2 |
| LARP1   | 2 |
| LAS1L   | 2 |
| LCLAT1  | 2 |
| LCORL   | 2 |
| LDB1    | 2 |
| LDLR    | 2 |
| LDLRAD4 | 2 |
| LEMD3   | 2 |
| LGR4    | 2 |
| LHFPL3  | 2 |

|          |   |
|----------|---|
| LHX1     | 2 |
| LIF      | 2 |
| LINGO1   | 2 |
| LIPH     | 2 |
| LLPH     | 2 |
| LMX1A    | 2 |
| LONRF1   | 2 |
| LOR      | 2 |
| LOX      | 2 |
| LOXL3    | 2 |
| LOXL4    | 2 |
| LPIN3    | 2 |
| LPPR4    | 2 |
| LRCH2    | 2 |
| LRFN4    | 2 |
| LRRC10B  | 2 |
| LRRC20   | 2 |
| LRRC34   | 2 |
| LRRC59   | 2 |
| LRRC7    | 2 |
| LRRC8D   | 2 |
| LSM11    | 2 |
| LTB4R    | 2 |
| LTN1     | 2 |
| LUC7L2   | 2 |
| LUC7L3   | 2 |
| LYRM1    | 2 |
| MAGI1    | 2 |
| MAGIX    | 2 |
| MAK16    | 2 |
| MANEAL   | 2 |
| MAP3K13  | 2 |
| MAP7     | 2 |
| MAPK14   | 2 |
| MAPK8IP3 | 2 |
| MAPRE2   | 2 |
| MARC1    | 2 |
| MARK2    | 2 |

|         |   |
|---------|---|
| MARS2   | 2 |
| MAT2A   | 2 |
| MB21D2  | 2 |
| MBD1    | 2 |
| MBNL1   | 2 |
| MBOAT1  | 2 |
| MBOAT2  | 2 |
| MBTD1   | 2 |
| MCMBP   | 2 |
| MCTP2   | 2 |
| MCTS1   | 2 |
| MDFI    | 2 |
| MDK     | 2 |
| MECOM   | 2 |
| MECP2   | 2 |
| MED1    | 2 |
| MED13   | 2 |
| MED21   | 2 |
| MED22   | 2 |
| MED26   | 2 |
| MED6    | 2 |
| MEGF11  | 2 |
| MEOX1   | 2 |
| MESDC1  | 2 |
| METTL10 | 2 |
| METTL20 | 2 |
| MFN1    | 2 |
| MFSD4   | 2 |
| MFSD6   | 2 |
| MGAT5   | 2 |
| MGRN1   | 2 |
| MICALCL | 2 |
| MIEF1   | 2 |
| MINK1   | 2 |
| MIOS    | 2 |
| MLLT3   | 2 |
| MLLT6   | 2 |
| MLTK    | 2 |

|          |   |
|----------|---|
| MMP11    | 2 |
| MMP14    | 2 |
| MMP19    | 2 |
| MOB1B    | 2 |
| MOB4     | 2 |
| MORC4    | 2 |
| MPP5     | 2 |
| MPPED2   | 2 |
| MPRIP    | 2 |
| MPV17L   | 2 |
| MRFAP1   | 2 |
| MRPL11   | 2 |
| MRPL22   | 2 |
| MRS2     | 2 |
| MSANTD3  | 2 |
| MSL1     | 2 |
| MSL2     | 2 |
| MSN      | 2 |
| MTMR10   | 2 |
| MTSS1    | 2 |
| MUT      | 2 |
| MVB12B   | 2 |
| MYBL1    | 2 |
| MYEF2    | 2 |
| MYL12A   | 2 |
| MYO10    | 2 |
| MYO1C    | 2 |
| MYO1E    | 2 |
| MYO1F    | 2 |
| MYO5B    | 2 |
| MYO9A    | 2 |
| MYPN     | 2 |
| MYRF     | 2 |
| MYT1L    | 2 |
| NAA40    | 2 |
| NAALADL2 | 2 |
| NACC1    | 2 |
| NAGPA    | 2 |



|          |   |
|----------|---|
| NAP1L5   | 2 |
| NAPEPLD  | 2 |
| NBEA     | 2 |
| NBEAL2   | 2 |
| NCAPD3   | 2 |
| NCDN     | 2 |
| NCOR1    | 2 |
| NDNF     | 2 |
| NDRG3    | 2 |
| NDRG4    | 2 |
| NDST2    | 2 |
| NDUFS1   | 2 |
| NECAP2   | 2 |
| NEK3     | 2 |
| NEURL1B  | 2 |
| NF1      | 2 |
| NFASC    | 2 |
| NFATC2IP | 2 |
| NHLRC2   | 2 |
| NHS      | 2 |
| NID1     | 2 |
| NID2     | 2 |
| NIPAL1   | 2 |
| NIPBL    | 2 |
| NKD1     | 2 |
| NKIRAS2  | 2 |
| NKRF     | 2 |
| NKX2-4   | 2 |
| NLGN2    | 2 |
| NME4     | 2 |
| NME6     | 2 |
| NMNAT2   | 2 |
| NMT1     | 2 |
| NNT      | 2 |
| NOL4     | 2 |
| NONO     | 2 |
| NOS1     | 2 |
| NPFFR1   | 2 |

|          |   |
|----------|---|
| NPTN     | 2 |
| NPTX1    | 2 |
| NR1D2    | 2 |
| NR4A2    | 2 |
| NR4A3    | 2 |
| NREP     | 2 |
| NRL      | 2 |
| NSG1     | 2 |
| NSMCE2   | 2 |
| NT5DC3   | 2 |
| NUDT3    | 2 |
| NUP50    | 2 |
| NUP88    | 2 |
| NXPH4    | 2 |
| NYNRIN   | 2 |
| OCRL     | 2 |
| OGFRL1   | 2 |
| OLR1     | 2 |
| OSMR     | 2 |
| OSTF1    | 2 |
| OTOF     | 2 |
| OTUB2    | 2 |
| P2RX1    | 2 |
| P2RX7    | 2 |
| P4HA2    | 2 |
| PACS1    | 2 |
| PAFAH1B1 | 2 |
| PAFAH1B2 | 2 |
| PAG1     | 2 |
| PAIP2B   | 2 |
| PAK4     | 2 |
| PAK6     | 2 |
| PALD1    | 2 |
| PALM3    | 2 |
| PAN2     | 2 |
| PANK3    | 2 |
| PANX2    | 2 |
| PAPOLA   | 2 |

|        |   |
|--------|---|
| PARD6G | 2 |
| PATL1  | 2 |
| PAX2   | 2 |
| PAX3   | 2 |
| PAX5   | 2 |
| PAX6   | 2 |
| PCDH20 | 2 |
| PCDH8  | 2 |
| PCNP   | 2 |
| PCNX   | 2 |
| PCSK6  | 2 |
| PCSK7  | 2 |
| PCTP   | 2 |
| PCYT1B | 2 |
| PDAP1  | 2 |
| PDE3A  | 2 |
| PDE7B  | 2 |
| PDGFB  | 2 |
| PDHB   | 2 |
| PDIK1L | 2 |
| PDK4   | 2 |
| PDPR   | 2 |
| PDS5A  | 2 |
| PDXDC1 | 2 |
| PEA15  | 2 |
| PEAK1  | 2 |
| PER1   | 2 |
| PER2   | 2 |
| PEX11B | 2 |
| PFN1   | 2 |
| PGRMC2 | 2 |
| PHF1   | 2 |
| PHF12  | 2 |
| PHF15  | 2 |
| PHLDA1 | 2 |
| PIANP  | 2 |
| PIAS1  | 2 |
| PIAS4  | 2 |

|         |   |
|---------|---|
| PIGA    | 2 |
| PIGU    | 2 |
| PIK3C2A | 2 |
| PITPNB  | 2 |
| PITPNM2 | 2 |
| PITPNM3 | 2 |
| PKNOX1  | 2 |
| PKNOX2  | 2 |
| PLA2G15 | 2 |
| PLA2G3  | 2 |
| PLAGL2  | 2 |
| PLCB1   | 2 |
| PLCL1   | 2 |
| PLD3    | 2 |
| PLD5    | 2 |
| PLEKHA5 | 2 |
| PLEKHG7 | 2 |
| PLEKHH1 | 2 |
| PLOD2   | 2 |
| PLXNA2  | 2 |
| PLXND1  | 2 |
| PMAIP1  | 2 |
| PMPCB   | 2 |
| PNISR   | 2 |
| PNRC1   | 2 |
| PODXL   | 2 |
| POGLUT1 | 2 |
| POGZ    | 2 |
| POLE4   | 2 |
| POLR1C  | 2 |
| POLR2D  | 2 |
| POMGNT1 | 2 |
| POTEG   | 2 |
| POTEM   | 2 |
| POU4F1  | 2 |
| POU6F2  | 2 |
| PP13439 | 2 |
| PPAPDC2 | 2 |

|          |   |
|----------|---|
| PPARA    | 2 |
| PPARGC1A | 2 |
| PPCS     | 2 |
| PPIL2    | 2 |
| PPIL6    | 2 |
| PPIP5K2  | 2 |
| PPM1H    | 2 |
| PPP1R13L | 2 |
| PPP1R2   | 2 |
| PPP1R3F  | 2 |
| PPP2CA   | 2 |
| PPP2R2A  | 2 |
| PPP3R1   | 2 |
| PQLC2    | 2 |
| PRC1     | 2 |
| PRDM5    | 2 |
| PREPL    | 2 |
| PRKACA   | 2 |
| PRKAG2   | 2 |
| PRKCE    | 2 |
| PRMT10   | 2 |
| PROX2    | 2 |
| PRPF38B  | 2 |
| PRPF4    | 2 |
| PRPS1    | 2 |
| PRR18    | 2 |
| PRRT2    | 2 |
| PRRT3    | 2 |
| PSAP     | 2 |
| PSMF1    | 2 |
| PSORS1C2 | 2 |
| PTBP3    | 2 |
| PTCHD2   | 2 |
| PTGFRN   | 2 |
| PTP4A1   | 2 |
| PTPLAD1  | 2 |
| PTPN4    | 2 |
| PTPN9    | 2 |

|         |   |
|---------|---|
| PTPRB   | 2 |
| PTPRU   | 2 |
| PURA    | 2 |
| PURG    | 2 |
| PUS7    | 2 |
| PXMP4   | 2 |
| PXT1    | 2 |
| QARS    | 2 |
| QSER1   | 2 |
| QSOX2   | 2 |
| RAB10   | 2 |
| RAB21   | 2 |
| RAB23   | 2 |
| RAB39B  | 2 |
| RAB3IL1 | 2 |
| RAB40C  | 2 |
| RABIF   | 2 |
| RAD18   | 2 |
| RAD9A   | 2 |
| RADIL   | 2 |
| RAG1    | 2 |
| RALA    | 2 |
| RALGAPB | 2 |
| RALGPS2 | 2 |
| RALY    | 2 |
| RAPGEF4 | 2 |
| RASA2   | 2 |
| RASGRP1 | 2 |
| RASL10A | 2 |
| RASSF2  | 2 |
| RB1     | 2 |
| RBBP5   | 2 |
| RBBP8   | 2 |
| RBFOX1  | 2 |
| RBM23   | 2 |
| RBM24   | 2 |
| RBM27   | 2 |
| RBM33   | 2 |

|         |   |
|---------|---|
| RBM38   | 2 |
| RBM7    | 2 |
| RBMS2   | 2 |
| RBPJ    | 2 |
| RCAN3   | 2 |
| RCN1    | 2 |
| RCOR1   | 2 |
| RCSD1   | 2 |
| RD3     | 2 |
| RDH10   | 2 |
| RECK    | 2 |
| REEP2   | 2 |
| REL     | 2 |
| RELT    | 2 |
| REPS2   | 2 |
| RETSAT  | 2 |
| RFX3    | 2 |
| RFX6    | 2 |
| RGAG1   | 2 |
| RGS16   | 2 |
| RGS6    | 2 |
| RHOBTB3 | 2 |
| RIMS2   | 2 |
| RIN2    | 2 |
| RIOK3   | 2 |
| RLF     | 2 |
| RMDN3   | 2 |
| RMND5A  | 2 |
| RNF130  | 2 |
| RNF144B | 2 |
| RNF169  | 2 |
| RNF170  | 2 |
| RNF185  | 2 |
| RNF19B  | 2 |
| RNF2    | 2 |
| RNF24   | 2 |
| RNF34   | 2 |
| RNF43   | 2 |

|               |   |
|---------------|---|
| RNF7          | 2 |
| RNF8          | 2 |
| RNFT1         | 2 |
| ROBO1         | 2 |
| ROBO2         | 2 |
| ROR1          | 2 |
| RORC          | 2 |
| RP11-122A3.2  | 2 |
| RP11-480I12.4 | 2 |
| RP11-796G6.2  | 2 |
| RPA3-AS1      | 2 |
| RPL15         | 2 |
| RPUSD2        | 2 |
| RRM2          | 2 |
| RSBN1L        | 2 |
| RTCA          | 2 |
| RUFY3         | 2 |
| RUNDC1        | 2 |
| S100A8        | 2 |
| S100PBP       | 2 |
| S1PR2         | 2 |
| SAMD8         | 2 |
| SASH1         | 2 |
| SBF2          | 2 |
| SCARA3        | 2 |
| SCN2A         | 2 |
| SCN5A         | 2 |
| SCO1          | 2 |
| SCRT1         | 2 |
| SCYL3         | 2 |
| SDC1          | 2 |
| SDHC          | 2 |
| SDHD          | 2 |
| SEC14L1       | 2 |
| SEC14L5       | 2 |
| SEC16B        | 2 |
| SEC31B        | 2 |
| SECISBP2      | 2 |

|          |   |
|----------|---|
| SEMA3A   | 2 |
| SEMA5A   | 2 |
| SEMA6D   | 2 |
| SENP1    | 2 |
| SEPHS1   | 2 |
| SEPT7    | 2 |
| SERBP1   | 2 |
| SERPING1 | 2 |
| SERTAD4  | 2 |
| SETD6    | 2 |
| SETD7    | 2 |
| SFT2D3   | 2 |
| SFTA3    | 2 |
| SFXN5    | 2 |
| SGK3     | 2 |
| SH2D4B   | 2 |
| SH3BP4   | 2 |
| SH3PXD2A | 2 |
| SHB      | 2 |
| SHCBP1   | 2 |
| SHISA7   | 2 |
| SHMT1    | 2 |
| SHOC2    | 2 |
| SHPK     | 2 |
| SHROOM3  | 2 |
| SIAH2    | 2 |
| SIK3     | 2 |
| SIN3A    | 2 |
| SIN3B    | 2 |
| SIPA1L1  | 2 |
| SIPA1L2  | 2 |
| SLC10A3  | 2 |
| SLC10A6  | 2 |
| SLC12A9  | 2 |
| SLC16A14 | 2 |
| SLC19A2  | 2 |
| SLC1A1   | 2 |
| SLC1A4   | 2 |

|          |   |
|----------|---|
| SLC20A1  | 2 |
| SLC24A3  | 2 |
| SLC24A4  | 2 |
| SLC25A10 | 2 |
| SLC25A18 | 2 |
| SLC25A27 | 2 |
| SLC25A32 | 2 |
| SLC26A4  | 2 |
| SLC28A3  | 2 |
| SLC2A12  | 2 |
| SLC2A14  | 2 |
| SLC2A3   | 2 |
| SLC30A4  | 2 |
| SLC30A6  | 2 |
| SLC31A1  | 2 |
| SLC35D2  | 2 |
| SLC35E1  | 2 |
| SLC35G1  | 2 |
| SLC36A4  | 2 |
| SLC38A9  | 2 |
| SLC39A1  | 2 |
| SLC45A4  | 2 |
| SLC4A1   | 2 |
| SLC4A4   | 2 |
| SLC52A3  | 2 |
| SLC5A9   | 2 |
| SLC6A1   | 2 |
| SLC6A15  | 2 |
| SLC6A5   | 2 |
| SLC7A11  | 2 |
| SLC8A2   | 2 |
| SLC9A2   | 2 |
| SLC9A6   | 2 |
| SLC9A9   | 2 |
| SLCO1A2  | 2 |
| SLCO5A1  | 2 |
| SLIT1    | 2 |
| SLIT3    | 2 |

|         |   |
|---------|---|
| SLITRK1 | 2 |
| SLITRK4 | 2 |
| SLK     | 2 |
| SLMAP   | 2 |
| SMAD5   | 2 |
| SMAD7   | 2 |
| SMAP2   | 2 |
| SMARCD1 | 2 |
| SMG6    | 2 |
| SMIM15  | 2 |
| SMTNL2  | 2 |
| SMU1    | 2 |
| SMUG1   | 2 |
| SND1    | 2 |
| SNPH    | 2 |
| SNX16   | 2 |
| SNX27   | 2 |
| SNX6    | 2 |
| SOBP    | 2 |
| SOCS3   | 2 |
| SOCS5   | 2 |
| SOCS6   | 2 |
| SOGA2   | 2 |
| SOGA3   | 2 |
| SON     | 2 |
| SORCS1  | 2 |
| SORT1   | 2 |
| SOS1    | 2 |
| SOWAHB  | 2 |
| SOX13   | 2 |
| SOX7    | 2 |
| SP8     | 2 |
| SPCS2   | 2 |
| SPEG    | 2 |
| SPEN    | 2 |
| SPOCD1  | 2 |
| SPOCK1  | 2 |
| SPOPL   | 2 |

|          |   |
|----------|---|
| SPRY3    | 2 |
| SPRYD4   | 2 |
| SPTBN4   | 2 |
| SPTSSB   | 2 |
| SPTY2D1  | 2 |
| SRCAP    | 2 |
| SRD5A3   | 2 |
| SREBF2   | 2 |
| SRP19    | 2 |
| SRRD     | 2 |
| SRSF6    | 2 |
| SS18     | 2 |
| SSPN     | 2 |
| SSX2IP   | 2 |
| ST6GAL2  | 2 |
| ST7-OT4  | 2 |
| STAB2    | 2 |
| STAG2    | 2 |
| STAM2    | 2 |
| STARD3NL | 2 |
| STARD4   | 2 |
| STARD9   | 2 |
| STAT4    | 2 |
| STEAP3   | 2 |
| STK10    | 2 |
| STK17A   | 2 |
| STK35    | 2 |
| STK38    | 2 |
| STK40    | 2 |
| STK4     | 2 |
| STRBP    | 2 |
| STRIP2   | 2 |
| STX3     | 2 |
| STX5     | 2 |
| STYX     | 2 |
| SUB1     | 2 |
| SUCLG2   | 2 |
| SULF2    | 2 |

|          |   |
|----------|---|
| SUPT16H  | 2 |
| SURF4    | 2 |
| SUV39H2  | 2 |
| SUV420H1 | 2 |
| SVIP     | 2 |
| SWT1     | 2 |
| SYBU     | 2 |
| SYNJ2BP  | 2 |
| SYNPO    | 2 |
| SYT6     | 2 |
| SYT7     | 2 |
| TAB2     | 2 |
| TAB3     | 2 |
| TACC1    | 2 |
| TANC1    | 2 |
| TAPT1    | 2 |
| TARBP2   | 2 |
| TAX1BP1  | 2 |
| TBC1D12  | 2 |
| TBC1D15  | 2 |
| TBCEL    | 2 |
| TBKBP1   | 2 |
| TBX2     | 2 |
| TBX4     | 2 |
| TBX5     | 2 |
| TCEB1    | 2 |
| TCF7L2   | 2 |
| TEAD1    | 2 |
| TEAD3    | 2 |
| TENM1    | 2 |
| TENM2    | 2 |
| TENM4    | 2 |
| TERF2    | 2 |
| TEX261   | 2 |
| TFAP2C   | 2 |
| TFCP2    | 2 |
| TFR2     | 2 |
| TFRC     | 2 |

|          |   |
|----------|---|
| TGDS     | 2 |
| TGIF2    | 2 |
| TGM2     | 2 |
| THAP1    | 2 |
| THAP9    | 2 |
| THBS2    | 2 |
| THOC2    | 2 |
| THRB     | 2 |
| THRSP    | 2 |
| THUMPD3  | 2 |
| TIFAB    | 2 |
| TIMM17B  | 2 |
| TIMM8B   | 2 |
| TIMP3    | 2 |
| TLL2     | 2 |
| TM7SF2   | 2 |
| TM9SF3   | 2 |
| TMC7     | 2 |
| TMED5    | 2 |
| TMEM108  | 2 |
| TMEM115  | 2 |
| TMEM123  | 2 |
| TMEM127  | 2 |
| TMEM132B | 2 |
| TMEM132D | 2 |
| TMEM143  | 2 |
| TMEM165  | 2 |
| TMEM167A | 2 |
| TMEM192  | 2 |
| TMEM194A | 2 |
| TMEM200C | 2 |
| TMEM233  | 2 |
| TMEM234  | 2 |
| TMEM236  | 2 |
| TMEM245  | 2 |
| TMEM251  | 2 |
| TMEM26   | 2 |
| TMEM43   | 2 |

|         |   |
|---------|---|
| TMEM65  | 2 |
| TMEM87B | 2 |
| TMPPE   | 2 |
| TMPRSS2 | 2 |
| TMTC3   | 2 |
| TMX4    | 2 |
| TNRC6A  | 2 |
| TNS1    | 2 |
| TOB2    | 2 |
| TOMM70A | 2 |
| TOPBP1  | 2 |
| TOX     | 2 |
| TPCN1   | 2 |
| TPM3    | 2 |
| TPP1    | 2 |
| TPST2   | 2 |
| TRABD   | 2 |
| TRAF7   | 2 |
| TRAK2   | 2 |
| TRAPPC8 | 2 |
| TRERF1  | 2 |
| TRIAP1  | 2 |
| TRIB1   | 2 |
| TRIB2   | 2 |
| TRIM17  | 2 |
| TRIM2   | 2 |
| TRNP1   | 2 |
| TSC22D3 | 2 |
| TSC22D4 | 2 |
| TSKU    | 2 |
| TSPAN2  | 2 |
| TSPEAR  | 2 |
| TSPYL5  | 2 |
| TTC31   | 2 |
| TTC39A  | 2 |
| TTC39C  | 2 |
| TTL     | 2 |
| TTYH3   | 2 |

|        |   |
|--------|---|
| TUB    | 2 |
| TUBD1  | 2 |
| TUSC2  | 2 |
| TWF1   | 2 |
| TWIST1 | 2 |
| TXK    | 2 |
| TYRO3  | 2 |
| UBE2D2 | 2 |
| UBE2D3 | 2 |
| UBE2G2 | 2 |
| UBE2K  | 2 |
| UBE2R2 | 2 |
| UBE2T  | 2 |
| UBE2W  | 2 |
| UBE2Z  | 2 |
| UBE3C  | 2 |
| UBXN4  | 2 |
| UCK2   | 2 |
| UFM1   | 2 |
| UHMK1  | 2 |
| ULK1   | 2 |
| UNC13A | 2 |
| UNC5D  | 2 |
| UNC80  | 2 |
| UQCC1  | 2 |
| USP13  | 2 |
| USP14  | 2 |
| USP20  | 2 |
| USP21  | 2 |
| USP32  | 2 |
| USP33  | 2 |
| USP38  | 2 |
| USP49  | 2 |
| USP6NL | 2 |
| USP8   | 2 |
| UTP15  | 2 |
| UTRN   | 2 |
| VAPA   | 2 |



|        |   |
|--------|---|
| VASH2  | 2 |
| VAV2   | 2 |
| VAV3   | 2 |
| VDAC1  | 2 |
| VGLL4  | 2 |
| VIM    | 2 |
| VMP1   | 2 |
| VPS36  | 2 |
| VPS39  | 2 |
| VPS53  | 2 |
| VSNL1  | 2 |
| VTI1A  | 2 |
| WDFY3  | 2 |
| WDR20  | 2 |
| WDR82  | 2 |
| WHSC1  | 2 |
| WLS    | 2 |
| WNK1   | 2 |
| WNK2   | 2 |
| WNT2B  | 2 |
| XK     | 2 |
| XKR7   | 2 |
| XKR8   | 2 |
| XPO1   | 2 |
| XPOT   | 2 |
| XRCC5  | 2 |
| YES1   | 2 |
| YIPF4  | 2 |
| YPEL2  | 2 |
| YTHDC1 | 2 |
| YTHDF2 | 2 |
| YWHAG  | 2 |
| YWHAH  | 2 |
| YWHAQ  | 2 |
| ZBED6  | 2 |
| ZBTB26 | 2 |
| ZBTB5  | 2 |
| ZBTB7B | 2 |

|          |   |
|----------|---|
| ZC3H12C  | 2 |
| ZC3H3    | 2 |
| ZC3H6    | 2 |
| ZC3HAV1L | 2 |
| ZCCHC8   | 2 |
| ZDHHC5   | 2 |
| ZDHHC7   | 2 |
| ZER1     | 2 |
| ZFAND6   | 2 |
| ZFP30    | 2 |
| ZFP62    | 2 |
| ZFPM2    | 2 |
| ZHX3     | 2 |
| ZIC2     | 2 |
| ZIK1     | 2 |
| ZKSCAN5  | 2 |
| ZMIZ1    | 2 |
| ZNF10    | 2 |
| ZNF140   | 2 |
| ZNF202   | 2 |
| ZNF280C  | 2 |
| ZNF282   | 2 |
| ZNF302   | 2 |
| ZNF322   | 2 |
| ZNF341   | 2 |
| ZNF354A  | 2 |
| ZNF354B  | 2 |
| ZNF362   | 2 |
| ZNF391   | 2 |
| ZNF426   | 2 |
| ZNF449   | 2 |
| ZNF462   | 2 |
| ZNF473   | 2 |
| ZNF487   | 2 |
| ZNF514   | 2 |
| ZNF521   | 2 |
| ZNF532   | 2 |
| ZNF566   | 2 |

|         |   |
|---------|---|
| ZNF583  | 2 |
| ZNF609  | 2 |
| ZNF618  | 2 |
| ZNF620  | 2 |
| ZNF641  | 2 |
| ZNF667  | 2 |
| ZNF689  | 2 |
| ZNF74   | 2 |
| ZNF774  | 2 |
| ZNF781  | 2 |
| ZNF783  | 2 |
| ZNF784  | 2 |
| ZNF800  | 2 |
| ZNF804B | 2 |
| ZNF827  | 2 |
| ZNF831  | 2 |
| ZNF879  | 2 |
| ZSWIM4  | 2 |
| ZSWIM5  | 2 |
| ZSWIM6  | 2 |
| ZXDC    | 2 |
| AARS2   | 1 |
| AATK    | 1 |
| ABCA1   | 1 |
| ABCA2   | 1 |
| ABCA9   | 1 |
| ABCB7   | 1 |
| ABCD2   | 1 |
| ABCD3   | 1 |
| ABCE1   | 1 |
| ABHD17B | 1 |
| ABHD2   | 1 |
| ABHD5   | 1 |
| ABI1    | 1 |
| ABI3BP  | 1 |
| ABLIM1  | 1 |
| ABR     | 1 |
| ABTB2   | 1 |

|             |   |
|-------------|---|
| AC003102.1  | 1 |
| AC005003.1  | 1 |
| AC006486.1  | 1 |
| AC007375.1  | 1 |
| AC079210.1  | 1 |
| ACAA2       | 1 |
| ACBD4       | 1 |
| ACHE        | 1 |
| ACP1        | 1 |
| ACSL4       | 1 |
| ACTA2       | 1 |
| ACTN1       | 1 |
| ACTR2       | 1 |
| ACTRT3      | 1 |
| ACVR1       | 1 |
| ADAM22      | 1 |
| ADAMTS17    | 1 |
| ADAMTSL1    | 1 |
| ADAMTSL2    | 1 |
| ADAMTSL3    | 1 |
| ADARB2      | 1 |
| ADCY2       | 1 |
| ADCYAP1R1   | 1 |
| ADM         | 1 |
| ADNP        | 1 |
| ADRA1A      | 1 |
| ADRA2C      | 1 |
| ADRBK1      | 1 |
| ADSS        | 1 |
| AF196779.12 | 1 |
| AFAP1       | 1 |
| AFG3L2      | 1 |
| AGAP2       | 1 |
| AGAP9       | 1 |
| AGPAT5      | 1 |
| AHCYL1      | 1 |
| AHNAK       | 1 |
| AHR         | 1 |

|                 |   |
|-----------------|---|
| AIDA            | 1 |
| AK1             | 1 |
| AK5             | 1 |
| AKAP1           | 1 |
| AKIRIN1         | 1 |
| AL021546.6      | 1 |
| AL590822.1      | 1 |
| ALG14           | 1 |
| ALG2            | 1 |
| ALPK2           | 1 |
| AMBRA1          | 1 |
| AMER2           | 1 |
| AMN1            | 1 |
| ANAPC16         | 1 |
| ANGEL1          | 1 |
| ANGPT4          | 1 |
| ANGPTL1         | 1 |
| ANK1            | 1 |
| ANKHD1-EIF4EBP3 | 1 |
| ANKRD12         | 1 |
| ANKRD27         | 1 |
| ANKRD29         | 1 |
| ANKRD34A        | 1 |
| ANKRD50         | 1 |
| ANKRD65         | 1 |
| ANLN            | 1 |
| ANO1            | 1 |
| ANO3            | 1 |
| ANP32A          | 1 |
| ANP32B          | 1 |
| ANTXR2          | 1 |
| ANXA7           | 1 |
| AP1AR           | 1 |
| AP1G1           | 1 |
| AP1M2           | 1 |
| AP1S3           | 1 |
| AP2B1           | 1 |
| AP2M1           | 1 |

|                |   |
|----------------|---|
| APBA2          | 1 |
| APLN           | 1 |
| APLP2          | 1 |
| APOB           | 1 |
| APOLD1         | 1 |
| APOO           | 1 |
| APOOL          | 1 |
| APPL2          | 1 |
| AQPEP          | 1 |
| AR             | 1 |
| ARAP2          | 1 |
| ARC            | 1 |
| ARCN1          | 1 |
| ARF6           | 1 |
| ARFGAP1        | 1 |
| ARHGAP1        | 1 |
| ARHGAP11A      | 1 |
| ARHGAP12       | 1 |
| ARHGAP19       | 1 |
| ARHGAP19-SLIT1 | 1 |
| ARHGAP26       | 1 |
| ARHGAP29       | 1 |
| ARHGAP31       | 1 |
| ARHGAP5        | 1 |
| ARHGAP6        | 1 |
| ARHGDIA        | 1 |
| ARHGEF26       | 1 |
| ARHGEF37       | 1 |
| ARHGEF5        | 1 |
| ARID1A         | 1 |
| ARID4A         | 1 |
| ARID4B         | 1 |
| ARIH1          | 1 |
| ARIH2          | 1 |
| ARL1           | 1 |
| ARL3           | 1 |
| ARL4C          | 1 |
| ARL8A          | 1 |

|            |   |
|------------|---|
| ARNT2      | 1 |
| ARPC4-TTL3 | 1 |
| ARSA       | 1 |
| ARSB       | 1 |
| AS3MT      | 1 |
| ASAH2C     | 1 |
| ASAP2      | 1 |
| ASB14      | 1 |
| ASB6       | 1 |
| ASB7       | 1 |
| ASIC1      | 1 |
| ASIC4      | 1 |
| ASNA1      | 1 |
| ATG13      | 1 |
| ATG2B      | 1 |
| ATG4A      | 1 |
| ATG4D      | 1 |
| ATL2       | 1 |
| ATM        | 1 |
| ATMIN      | 1 |
| ATOH8      | 1 |
| ATP10A     | 1 |
| ATP11C     | 1 |
| ATP1A2     | 1 |
| ATP1B2     | 1 |
| ATP1B3     | 1 |
| ATP2C1     | 1 |
| ATP6V0A2   | 1 |
| ATP6V1B2   | 1 |
| ATP8A2     | 1 |
| ATP8B1     | 1 |
| ATP9A      | 1 |
| ATRNL1     | 1 |
| AVPI1      | 1 |
| AXL        | 1 |
| B3GNT4     | 1 |
| B4GALNT1   | 1 |
| B4GALT1    | 1 |

|         |   |
|---------|---|
| B4GALT2 | 1 |
| B4GALT5 | 1 |
| BAAT    | 1 |
| BAG5    | 1 |
| BAMBI   | 1 |
| BAP1    | 1 |
| BARHL2  | 1 |
| BAZ1A   | 1 |
| BAZ2B   | 1 |
| BCAT2   | 1 |
| BCL11B  | 1 |
| BCL2L13 | 1 |
| BCL2L2  | 1 |
| BCL3    | 1 |
| BCL6    | 1 |
| BCL9    | 1 |
| BCORL1  | 1 |
| BCR     | 1 |
| BDNF    | 1 |
| BEST4   | 1 |
| BET1L   | 1 |
| BHLHE40 | 1 |
| BHLHE41 | 1 |
| BICC1   | 1 |
| BICD2   | 1 |
| BLOC1S3 | 1 |
| BMP8A   | 1 |
| BMP8B   | 1 |
| BMPER   | 1 |
| BMPR1B  | 1 |
| BNIP2   | 1 |
| BNIP3   | 1 |
| BNIP3L  | 1 |
| BRAP    | 1 |
| BRE     | 1 |
| BRMS1L  | 1 |
| BTBD11  | 1 |
| BZRAP1  | 1 |

|           |   |
|-----------|---|
| C10orf131 | 1 |
| C10orf32  | 1 |
| C10orf54  | 1 |
| C11orf96  | 1 |
| C12orf43  | 1 |
| C12orf66  | 1 |
| C12orf73  | 1 |
| C12orf79  | 1 |
| C15orf52  | 1 |
| C16orf87  | 1 |
| C17orf100 | 1 |
| C19orf40  | 1 |
| C1orf106  | 1 |
| C1orf131  | 1 |
| C1orf168  | 1 |
| C1orf198  | 1 |
| C1orf50   | 1 |
| C20orf196 | 1 |
| C20orf27  | 1 |
| C22orf15  | 1 |
| C22orf31  | 1 |
| C2CD2     | 1 |
| C2orf42   | 1 |
| C2orf68   | 1 |
| C2orf71   | 1 |
| C2orf72   | 1 |
| C3orf65   | 1 |
| C3orf70   | 1 |
| C5orf24   | 1 |
| C6orf106  | 1 |
| C6orf222  | 1 |
| C6orf223  | 1 |
| C6orf47   | 1 |
| C6orf62   | 1 |
| C6orf89   | 1 |
| C8orf37   | 1 |
| C8orf4    | 1 |
| C8orf46   | 1 |

|         |   |
|---------|---|
| C9orf69 | 1 |
| C9orf72 | 1 |
| CA10    | 1 |
| CAB39L  | 1 |
| CACHD1  | 1 |
| CACNA1B | 1 |
| CADM4   | 1 |
| CALR    | 1 |
| CAMK2B  | 1 |
| CAMK2D  | 1 |
| CAMK2G  | 1 |
| CAMKK1  | 1 |
| CAMKK2  | 1 |
| CAMTA2  | 1 |
| CAPN5   | 1 |
| CARD11  | 1 |
| CARM1   | 1 |
| CASD1   | 1 |
| CASP10  | 1 |
| CAST    | 1 |
| CASZ1   | 1 |
| CBFB    | 1 |
| CBLN2   | 1 |
| CBLN4   | 1 |
| CBR4    | 1 |
| CBX4    | 1 |
| CBX8    | 1 |
| CC2D1A  | 1 |
| CCAR1   | 1 |
| CCDC126 | 1 |
| CCDC134 | 1 |
| CCDC149 | 1 |
| CCDC152 | 1 |
| CCDC160 | 1 |
| CCDC171 | 1 |
| CCDC177 | 1 |
| CCDC41  | 1 |
| CCDC50  | 1 |

|          |   |
|----------|---|
| CCDC58   | 1 |
| CCDC64   | 1 |
| CCDC85A  | 1 |
| CCDC85C  | 1 |
| CCER1    | 1 |
| CCL4     | 1 |
| CCL4L1   | 1 |
| CCL8     | 1 |
| CCM2     | 1 |
| CCNA2    | 1 |
| CCNB1    | 1 |
| CCND3    | 1 |
| CCNDBP1  | 1 |
| CCNG1    | 1 |
| CCNI2    | 1 |
| CCNK     | 1 |
| CCNL1    | 1 |
| CCP110   | 1 |
| CCRN4L   | 1 |
| CCT3     | 1 |
| CD163    | 1 |
| CD164L2  | 1 |
| CD28     | 1 |
| CD4      | 1 |
| CD47     | 1 |
| CD69     | 1 |
| CD84     | 1 |
| CD96     | 1 |
| CDC14A   | 1 |
| CDC37    | 1 |
| CDC42BPG | 1 |
| CDC5L    | 1 |
| CDH11    | 1 |
| CDH8     | 1 |
| CDK1     | 1 |
| CDK17    | 1 |
| CDK18    | 1 |
| CDK19    | 1 |

|         |   |
|---------|---|
| CDK8    | 1 |
| CDKL2   | 1 |
| CDKN1B  | 1 |
| CDKN1C  | 1 |
| CDON    | 1 |
| CEBPA   | 1 |
| CELF6   | 1 |
| CENPO   | 1 |
| CEP128  | 1 |
| CEP170  | 1 |
| CEP170B | 1 |
| CEP250  | 1 |
| CEP55   | 1 |
| CEP76   | 1 |
| CEP97   | 1 |
| CERS2   | 1 |
| CERS6   | 1 |
| CFL1    | 1 |
| CGGBP1  | 1 |
| CGN     | 1 |
| CHAMP1  | 1 |
| CHCHD4  | 1 |
| CHD1    | 1 |
| CHI3L1  | 1 |
| CHL1    | 1 |
| CHMP1A  | 1 |
| CHMP2B  | 1 |
| CHMP3   | 1 |
| CHMP4B  | 1 |
| CHRN2   | 1 |
| CHST10  | 1 |
| CHURC1  | 1 |
| CIAPIN1 | 1 |
| CINP    | 1 |
| CISD3   | 1 |
| CITED2  | 1 |
| CITED4  | 1 |
| CKAP4   | 1 |

|         |   |
|---------|---|
| CLCC1   | 1 |
| CLCN2   | 1 |
| CLCN3   | 1 |
| CLEC2D  | 1 |
| CLIC5   | 1 |
| CLLU1   | 1 |
| CLMN    | 1 |
| CLMP    | 1 |
| CLPTM1L | 1 |
| CLSPN   | 1 |
| CLSTN2  | 1 |
| CLTC    | 1 |
| CLTCL1  | 1 |
| CLUH    | 1 |
| CLVS1   | 1 |
| CMPK2   | 1 |
| CMTM7   | 1 |
| CNIH4   | 1 |
| CNN2    | 1 |
| CNN3    | 1 |
| CNOT1   | 1 |
| CNTN1   | 1 |
| CNTN2   | 1 |
| CNTN4   | 1 |
| CNTNAP2 | 1 |
| CNTNAP5 | 1 |
| COG3    | 1 |
| COL13A1 | 1 |
| COL16A1 | 1 |
| COL19A1 | 1 |
| COL23A1 | 1 |
| COL25A1 | 1 |
| COL26A1 | 1 |
| COL4A4  | 1 |
| COLQ    | 1 |
| COMMD10 | 1 |
| COMTD1  | 1 |
| COPS5   | 1 |

|                |   |
|----------------|---|
| COQ10B         | 1 |
| COQ6           | 1 |
| COX15          | 1 |
| COX8C          | 1 |
| CPNE2          | 1 |
| CPPED1         | 1 |
| CPSF6          | 1 |
| CPT1A          | 1 |
| CR2            | 1 |
| CRCP           | 1 |
| CREG2          | 1 |
| CRIM1          | 1 |
| CRISP3         | 1 |
| CRISPLD1       | 1 |
| CRMP1          | 1 |
| CRTC2          | 1 |
| CRYBG3         | 1 |
| CS             | 1 |
| CSF2RB         | 1 |
| CSK            | 1 |
| CSMD1          | 1 |
| CSNK1A1        | 1 |
| CSNK1G3        | 1 |
| CSPP1          | 1 |
| CSRNP1         | 1 |
| CSRNP2         | 1 |
| CSTF3          | 1 |
| CTD-2207O23.12 | 1 |
| CTD-2228K2.5   | 1 |
| CTDP1          | 1 |
| CTDSP1         | 1 |
| CTDSP2         | 1 |
| CTGF           | 1 |
| CTNND1         | 1 |
| CUL4A          | 1 |
| CXCR5          | 1 |
| CXXC5          | 1 |
| CYB561         | 1 |

|         |   |
|---------|---|
| CYB5B   | 1 |
| CYCS    | 1 |
| CYP1B1  | 1 |
| CYP26B1 | 1 |
| CYP4F22 | 1 |
| CYR61   | 1 |
| CYTH2   | 1 |
| DAAM1   | 1 |
| DAAM2   | 1 |
| DAB2IP  | 1 |
| DALRD3  | 1 |
| DBP     | 1 |
| DCAF11  | 1 |
| DCAF7   | 1 |
| DCBLD1  | 1 |
| DCHS1   | 1 |
| DCLK1   | 1 |
| DCUN1D5 | 1 |
| DDA1    | 1 |
| DDAH1   | 1 |
| DDIT4   | 1 |
| DDTL    | 1 |
| DDX5    | 1 |
| DDX52   | 1 |
| DEDD    | 1 |
| DEK     | 1 |
| DENND1A | 1 |
| DENND4B | 1 |
| DENND4C | 1 |
| DENR    | 1 |
| DEPDC1  | 1 |
| DERL2   | 1 |
| DGKE    | 1 |
| DHCR24  | 1 |
| DHRS3   | 1 |
| DHX36   | 1 |
| DIAPH1  | 1 |
| DIO3    | 1 |

|               |   |
|---------------|---|
| DIP2B         | 1 |
| DIP2C         | 1 |
| DIRAS2        | 1 |
| DIRC2         | 1 |
| DKFZP779J2370 | 1 |
| DKK2          | 1 |
| DLEU1         | 1 |
| DLGAP3        | 1 |
| DLL1          | 1 |
| DLX3          | 1 |
| DMRT3         | 1 |
| DMRTA2        | 1 |
| DMTN          | 1 |
| DMXL1         | 1 |
| DNAJA4        | 1 |
| DNAJC13       | 1 |
| DNAJC21       | 1 |
| DNAJC5        | 1 |
| DNAL4         | 1 |
| DND1          | 1 |
| DNMT3A        | 1 |
| DOCK5         | 1 |
| DOCK7         | 1 |
| DOCK9         | 1 |
| DOHH          | 1 |
| DOK4          | 1 |
| DOLPP1        | 1 |
| DONSON        | 1 |
| DPP6          | 1 |
| DPY19L3       | 1 |
| DPYSL2        | 1 |
| DRAM1         | 1 |
| DRD1          | 1 |
| DRGX          | 1 |
| DSC1          | 1 |
| DSEL          | 1 |
| DSG2          | 1 |
| DTD2          | 1 |



|          |   |
|----------|---|
| DTNBP1   | 1 |
| DUSP10   | 1 |
| DUSP5    | 1 |
| DUSP6    | 1 |
| DUSP8    | 1 |
| DUT      | 1 |
| DYNC1I1  | 1 |
| DYRK1B   | 1 |
| E2F7     | 1 |
| E2F8     | 1 |
| ECT2L    | 1 |
| EDA2R    | 1 |
| EDAR     | 1 |
| EDARADD  | 1 |
| EED      | 1 |
| EFR3A    | 1 |
| EGF      | 1 |
| EGFLAM   | 1 |
| EGLN1    | 1 |
| EGR1     | 1 |
| EHBP1    | 1 |
| EI24     | 1 |
| EIF2AK2  | 1 |
| EIF2S1   | 1 |
| EIF3A    | 1 |
| EIF3H    | 1 |
| EIF4A1   | 1 |
| EIF4E    | 1 |
| EIF4EBP2 | 1 |
| EIF4EBP3 | 1 |
| ELAVL3   | 1 |
| ELF3     | 1 |
| ELK3     | 1 |
| ELMO1    | 1 |
| ELMOD2   | 1 |
| ELN      | 1 |
| ELOVL3   | 1 |
| ELOVL5   | 1 |

|          |   |
|----------|---|
| ELP4     | 1 |
| EMC1     | 1 |
| EML1     | 1 |
| EML4     | 1 |
| EML6     | 1 |
| EN2      | 1 |
| ENC1     | 1 |
| ENGASE   | 1 |
| ENOX2    | 1 |
| ENPP1    | 1 |
| ENPP5    | 1 |
| ENY2     | 1 |
| EP300    | 1 |
| EPAS1    | 1 |
| EPB41    | 1 |
| EPB41L1  | 1 |
| EPB41L3  | 1 |
| EPB41L4B | 1 |
| EPB41L5  | 1 |
| EPG5     | 1 |
| EPGN     | 1 |
| EPHA8    | 1 |
| EPHB1    | 1 |
| EPHB3    | 1 |
| EPHX3    | 1 |
| EPHX4    | 1 |
| EPS15    | 1 |
| ERBB2    | 1 |
| ERC1     | 1 |
| ERC2     | 1 |
| ERI1     | 1 |
| ERLIN1   | 1 |
| ERLIN2   | 1 |
| ERMN     | 1 |
| ESCO1    | 1 |
| ESD      | 1 |
| ESM1     | 1 |
| ESYT1    | 1 |

|          |   |
|----------|---|
| ETF1     | 1 |
| ETS1     | 1 |
| ETV6     | 1 |
| EVI2A    | 1 |
| EXOC6B   | 1 |
| EXOG     | 1 |
| EXOSC2   | 1 |
| EXOSC3   | 1 |
| EYA1     | 1 |
| F13A1    | 1 |
| F2R      | 1 |
| F3       | 1 |
| FADS6    | 1 |
| FAF1     | 1 |
| FAM105B  | 1 |
| FAM107A  | 1 |
| FAM107B  | 1 |
| FAM110B  | 1 |
| FAM114A1 | 1 |
| FAM122A  | 1 |
| FAM127A  | 1 |
| FAM127B  | 1 |
| FAM127C  | 1 |
| FAM133A  | 1 |
| FAM13A   | 1 |
| FAM13B   | 1 |
| FAM151B  | 1 |
| FAM160A2 | 1 |
| FAM167A  | 1 |
| FAM172A  | 1 |
| FAM175B  | 1 |
| FAM177B  | 1 |
| FAM179A  | 1 |
| FAM19A2  | 1 |
| FAM216A  | 1 |
| FAM216B  | 1 |
| FAM3C    | 1 |
| FAM45A   | 1 |

|         |   |
|---------|---|
| FAM46B  | 1 |
| FAM49A  | 1 |
| FAM53C  | 1 |
| FAM58A  | 1 |
| FAM60A  | 1 |
| FAM69A  | 1 |
| FAM76B  | 1 |
| FAM78B  | 1 |
| FAM83D  | 1 |
| FAM83F  | 1 |
| FAM89A  | 1 |
| FAM8A1  | 1 |
| FAM91A1 | 1 |
| FANCC   | 1 |
| FANCE   | 1 |
| FBN1    | 1 |
| FBRS    | 1 |
| FBXL16  | 1 |
| FBXL17  | 1 |
| FBXL3   | 1 |
| FBXL4   | 1 |
| FBXO10  | 1 |
| FBXO11  | 1 |
| FBXO27  | 1 |
| FBXO36  | 1 |
| FBXO40  | 1 |
| FBXO8   | 1 |
| FBXW4   | 1 |
| FCGRT   | 1 |
| FCRLB   | 1 |
| FDXR    | 1 |
| FEM1B   | 1 |
| FERMT1  | 1 |
| FGF10   | 1 |
| FGF14   | 1 |
| FGF6    | 1 |
| FGF9    | 1 |
| FGFBP3  | 1 |

|          |   |
|----------|---|
| FHAD1    | 1 |
| FHDC1    | 1 |
| FHL1     | 1 |
| FHL5     | 1 |
| FIBIN    | 1 |
| FKBP1A   | 1 |
| FKBP4    | 1 |
| FLAD1    | 1 |
| FLJ00104 | 1 |
| FLJ00388 | 1 |
| FLJ27365 | 1 |
| FLOT1    | 1 |
| FMNL2    | 1 |
| FN1      | 1 |
| FNBP1    | 1 |
| FNBP4    | 1 |
| FNDC5    | 1 |
| FOS      | 1 |
| FOXB1    | 1 |
| FOXD4    | 1 |
| FOXD4L1  | 1 |
| FOXD4L2  | 1 |
| FO XK1   | 1 |
| FO XK2   | 1 |
| FO XN1   | 1 |
| FO XN2   | 1 |
| FO XN3   | 1 |
| FOXO1    | 1 |
| FOXP4    | 1 |
| FOXRED2  | 1 |
| FRMD4A   | 1 |
| FRMD6    | 1 |
| FRMPD2   | 1 |
| FSCN1    | 1 |
| FSD1L    | 1 |
| FSTL1    | 1 |
| FTO      | 1 |
| FTSJ2    | 1 |

|           |   |
|-----------|---|
| FUT4      | 1 |
| FYCO1     | 1 |
| FYTTD1    | 1 |
| FZD5      | 1 |
| FZD6      | 1 |
| G2E3      | 1 |
| G6PC3     | 1 |
| G6PD      | 1 |
| GABARAPL1 | 1 |
| GABBR1    | 1 |
| GABRB2    | 1 |
| GABRQ     | 1 |
| GAD1      | 1 |
| GAL3ST3   | 1 |
| GAL3ST4   | 1 |
| GALNT10   | 1 |
| GALNT16   | 1 |
| GATC      | 1 |
| GATSL3    | 1 |
| GBA       | 1 |
| GBA2      | 1 |
| GCC1      | 1 |
| GCC2      | 1 |
| GCNT1     | 1 |
| GCNT2     | 1 |
| GDA       | 1 |
| GDI1      | 1 |
| GDNF      | 1 |
| GIT1      | 1 |
| GJA3      | 1 |
| GK        | 1 |
| GLIPR2    | 1 |
| GLIS2     | 1 |
| GLP1R     | 1 |
| GLRX2     | 1 |
| GLTP      | 1 |
| GLYR1     | 1 |
| GNA13     | 1 |

|         |   |
|---------|---|
| GNAI3   | 1 |
| GNAO1   | 1 |
| GNB1L   | 1 |
| GNB2L1  | 1 |
| GNG2    | 1 |
| GOLGA6A | 1 |
| GOLGA6B | 1 |
| GOLGA6C | 1 |
| GOLGA6D | 1 |
| GOLGA8A | 1 |
| GOLGA8B | 1 |
| GOLGA8F | 1 |
| GOLGA8G | 1 |
| GPATCH2 | 1 |
| GPC1    | 1 |
| GPD2    | 1 |
| GPHN    | 1 |
| GPR124  | 1 |
| GPR137B | 1 |
| GPR153  | 1 |
| GPR155  | 1 |
| GPR158  | 1 |
| GPR173  | 1 |
| GPR180  | 1 |
| GPR22   | 1 |
| GPR6    | 1 |
| GPR85   | 1 |
| GPRASP2 | 1 |
| GPRC5A  | 1 |
| GPSM1   | 1 |
| GRB2    | 1 |
| GRIA1   | 1 |
| GRIA2   | 1 |
| GRID2   | 1 |
| GRIK4   | 1 |
| GRINA   | 1 |
| GRIP1   | 1 |
| GRK6    | 1 |

|           |   |
|-----------|---|
| GRM7      | 1 |
| GRSF1     | 1 |
| GRWD1     | 1 |
| GSE1      | 1 |
| GSK3B     | 1 |
| GTDC1     | 1 |
| GTF2H1    | 1 |
| GUCD1     | 1 |
| GULP1     | 1 |
| H6PD      | 1 |
| HAP1      | 1 |
| HAPLN4    | 1 |
| HAUS3     | 1 |
| HAVCR1    | 1 |
| HCN1      | 1 |
| HCN2      | 1 |
| HDAC2     | 1 |
| HDAC4     | 1 |
| HECTD3    | 1 |
| HES1      | 1 |
| HEXIM1    | 1 |
| HINT3     | 1 |
| HIST1H2BH | 1 |
| HIST1H3I  | 1 |
| HM13      | 1 |
| HMBS      | 1 |
| HMCN1     | 1 |
| HMGB1     | 1 |
| HMGB2     | 1 |
| HMGCLL1   | 1 |
| HMGCS1    | 1 |
| HMX1      | 1 |
| HNF1B     | 1 |
| HNF4A     | 1 |
| HNRNPA0   | 1 |
| HNRNPD    | 1 |
| HNRNPH1   | 1 |
| HNRNPK    | 1 |

|          |   |
|----------|---|
| HNRNPR   | 1 |
| HNRNPU   | 1 |
| HNRNPUL2 | 1 |
| HOOK3    | 1 |
| HOXA11   | 1 |
| HOXA5    | 1 |
| HOXB5    | 1 |
| HOXB8    | 1 |
| HOXC12   | 1 |
| HOXD4    | 1 |
| HPRT1    | 1 |
| HRH1     | 1 |
| HS3ST3A1 | 1 |
| HS3ST5   | 1 |
| HSBP1    | 1 |
| HSDL1    | 1 |
| HSP90B1  | 1 |
| HSPA13   | 1 |
| HSPA2    | 1 |
| HSPA4L   | 1 |
| HSPA5    | 1 |
| HTR2C    | 1 |
| HTRA3    | 1 |
| HTT      | 1 |
| HYOU1    | 1 |
| IARS2    | 1 |
| ID2      | 1 |
| ID4      | 1 |
| IER5L    | 1 |
| IFNG     | 1 |
| IFRG15   | 1 |
| IGF2R    | 1 |
| IGFBP3   | 1 |
| IGFBP5   | 1 |
| IGFN1    | 1 |
| IGSF11   | 1 |
| IL1RAP   | 1 |
| IL21R    | 1 |

|             |   |
|-------------|---|
| IL2RB       | 1 |
| IL5RA       | 1 |
| ILDR1       | 1 |
| ILF3        | 1 |
| IMPAD1      | 1 |
| INHBB       | 1 |
| INIP        | 1 |
| INPP4A      | 1 |
| INPP5E      | 1 |
| INSL5       | 1 |
| INTS6       | 1 |
| IPO8        | 1 |
| IQCJ-SCHIP1 | 1 |
| IQGAP1      | 1 |
| IQGAP2      | 1 |
| IRAK1BP1    | 1 |
| IRF1        | 1 |
| IRF2BPL     | 1 |
| IRS4        | 1 |
| IRX4        | 1 |
| ISL1        | 1 |
| ISM2        | 1 |
| ISPD        | 1 |
| ITCH        | 1 |
| ITFG3       | 1 |
| ITGA11      | 1 |
| ITGA2       | 1 |
| ITGA3       | 1 |
| ITPKB       | 1 |
| ITPR1       | 1 |
| ITPRIPL2    | 1 |
| JAKMIP1     | 1 |
| JAKMIP2     | 1 |
| KALRN       | 1 |
| KANK1       | 1 |
| KARS        | 1 |
| KAT2B       | 1 |
| KAT6A       | 1 |

|          |   |
|----------|---|
| KAZN     | 1 |
| KBTBD8   | 1 |
| KCNA2    | 1 |
| KCNIP1   | 1 |
| KCNJ10   | 1 |
| KCNJ13   | 1 |
| KCNJ14   | 1 |
| KCNJ5    | 1 |
| KCNK12   | 1 |
| KCNK5    | 1 |
| KCNK9    | 1 |
| KCNMB2   | 1 |
| KCTD3    | 1 |
| KCTD7    | 1 |
| KDEL1    | 1 |
| KIAA0101 | 1 |
| KIAA0513 | 1 |
| KIAA1024 | 1 |
| KIAA1468 | 1 |
| KIAA1551 | 1 |
| KIAA1614 | 1 |
| KIAA1671 | 1 |
| KIAA2013 | 1 |
| KIAA2026 | 1 |
| KIF13A   | 1 |
| KIF13B   | 1 |
| KIF19    | 1 |
| KIF1B    | 1 |
| KIF26A   | 1 |
| KIF5A    | 1 |
| KIT      | 1 |
| KLF10    | 1 |
| KLF12    | 1 |
| KLF2     | 1 |
| KLF3     | 1 |
| KLHL1    | 1 |
| KLHL11   | 1 |
| KLHL17   | 1 |

|         |   |
|---------|---|
| KLHL20  | 1 |
| KLHL24  | 1 |
| KLHL26  | 1 |
| KLHL29  | 1 |
| KLHL38  | 1 |
| KLHL7   | 1 |
| KLHL8   | 1 |
| KLHL9   | 1 |
| KNTC1   | 1 |
| KRT222  | 1 |
| KSR1    | 1 |
| KTN1    | 1 |
| L3MBTL3 | 1 |
| LAMB3   | 1 |
| LASP1   | 1 |
| LCA5    | 1 |
| LDLRAP1 | 1 |
| LDOC1L  | 1 |
| LGI1    | 1 |
| LGI2    | 1 |
| LHFPL2  | 1 |
| LHX3    | 1 |
| LHX6    | 1 |
| LIG3    | 1 |
| LIMS1   | 1 |
| LIN7C   | 1 |
| LIN9    | 1 |
| LIPG    | 1 |
| LLGL2   | 1 |
| LMBR1   | 1 |
| LMBR1L  | 1 |
| LMBRD2  | 1 |
| LMCD1   | 1 |
| LMNB2   | 1 |
| LMO1    | 1 |
| LMOD1   | 1 |
| LNPEP   | 1 |
| LNX2    | 1 |

|         |   |
|---------|---|
| LPAR3   | 1 |
| LPCAT1  | 1 |
| LPCAT2  | 1 |
| LRBA    | 1 |
| LRCH1   | 1 |
| LRCH3   | 1 |
| LRFN2   | 1 |
| LRIG1   | 1 |
| LRP10   | 1 |
| LRP1B   | 1 |
| LRP4    | 1 |
| LRRC16A | 1 |
| LRRC32  | 1 |
| LRRC58  | 1 |
| LRRC8C  | 1 |
| LRRK1   | 1 |
| LRRN1   | 1 |
| LRRTM2  | 1 |
| LSAMP   | 1 |
| LSM10   | 1 |
| LSM12   | 1 |
| LSM14A  | 1 |
| LUC7L   | 1 |
| MAB21L2 | 1 |
| MACF1   | 1 |
| MADD    | 1 |
| MAEA    | 1 |
| MAF     | 1 |
| MAFG    | 1 |
| MAGEL2  | 1 |
| MAGI2   | 1 |
| MAGOHB  | 1 |
| MAK     | 1 |
| MAMDC2  | 1 |
| MAML1   | 1 |
| MAMSTR  | 1 |
| MAN1A2  | 1 |
| MAN1C1  | 1 |

|          |   |
|----------|---|
| MAN2A1   | 1 |
| MAP1A    | 1 |
| MAP2K1   | 1 |
| MAP2K3   | 1 |
| MAP2K6   | 1 |
| MAP3K10  | 1 |
| MAP3K12  | 1 |
| MAP3K8   | 1 |
| MAP4K2   | 1 |
| MAP7D1   | 1 |
| MAPK7    | 1 |
| MAPKBP1  | 1 |
| MAPRE1   | 1 |
| MAPT     | 1 |
| MARCH3   | 1 |
| MARCH6   | 1 |
| MARCKS   | 1 |
| MARCKSL1 | 1 |
| MARK1    | 1 |
| MATN3    | 1 |
| MATR3    | 1 |
| MBD5     | 1 |
| MCFD2    | 1 |
| MCL1     | 1 |
| MCTP1    | 1 |
| MCUR1    | 1 |
| MDFIC    | 1 |
| MDGA1    | 1 |
| MDN1     | 1 |
| ME2      | 1 |
| MED13L   | 1 |
| MED14    | 1 |
| MEGF9    | 1 |
| MEIS1    | 1 |
| MELK     | 1 |
| MEMO1    | 1 |
| MET      | 1 |
| METAP1   | 1 |

|         |   |
|---------|---|
| METAP2  | 1 |
| METRNL  | 1 |
| METTL8  | 1 |
| MFAP2   | 1 |
| MFAP3   | 1 |
| MFSD9   | 1 |
| MIA3    | 1 |
| MICAL2  | 1 |
| MICAL3  | 1 |
| MID1    | 1 |
| MID1IP1 | 1 |
| MID2    | 1 |
| MIDN    | 1 |
| MIP     | 1 |
| MIPOL1  | 1 |
| MISP    | 1 |
| MKNK2   | 1 |
| MKRN1   | 1 |
| MKX     | 1 |
| MLF1    | 1 |
| MLLT1   | 1 |
| MLX     | 1 |
| MMAB    | 1 |
| MMD     | 1 |
| MME     | 1 |
| MMGT1   | 1 |
| MMS19   | 1 |
| MNT     | 1 |
| MNX1    | 1 |
| MOCS1   | 1 |
| MORF4L1 | 1 |
| MOSPD1  | 1 |
| MPP1    | 1 |
| MPP7    | 1 |
| MRAS    | 1 |
| MRC2    | 1 |
| MROH8   | 1 |
| MRPL17  | 1 |

|                |   |
|----------------|---|
| MRPL4          | 1 |
| MRPL45         | 1 |
| MSANTD3-TMEFF1 | 1 |
| MSI1           | 1 |
| MSMO1          | 1 |
| MST4           | 1 |
| MTCH2          | 1 |
| MTERFD1        | 1 |
| MTF1           | 1 |
| MTHFR          | 1 |
| MTMR14         | 1 |
| MTMR6          | 1 |
| MTMR9          | 1 |
| MTPN           | 1 |
| MTX3           | 1 |
| MYADM          | 1 |
| MYB            | 1 |
| MYBL2          | 1 |
| MYCBP2         | 1 |
| MYLIP          | 1 |
| MYLK           | 1 |
| MYO18A         | 1 |
| MYO19          | 1 |
| MYO9B          | 1 |
| NAA15          | 1 |
| NAA50          | 1 |
| NAALADL1       | 1 |
| NAB1           | 1 |
| NAGA           | 1 |
| NAIF1          | 1 |
| NAMPT          | 1 |
| NANP           | 1 |
| NAPB           | 1 |
| NAPRT1         | 1 |
| NAV1           | 1 |
| NAV2           | 1 |
| NBEAL1         | 1 |
| NCF1           | 1 |



|          |   |
|----------|---|
| NCKAP5   | 1 |
| NCKAP5L  | 1 |
| NCKIPSD  | 1 |
| NCOA2    | 1 |
| NCOA4    | 1 |
| NDFIP2   | 1 |
| NDRG1    | 1 |
| NDRG2    | 1 |
| NDUFA7   | 1 |
| NDUFAF4  | 1 |
| NEK10    | 1 |
| NEK4     | 1 |
| NEK6     | 1 |
| NEK7     | 1 |
| NET1     | 1 |
| NEUROD2  | 1 |
| NEUROD4  | 1 |
| NEUROG1  | 1 |
| NFAM1    | 1 |
| NFATC4   | 1 |
| NFXL1    | 1 |
| NGDN     | 1 |
| NGFR     | 1 |
| NHSL2    | 1 |
| NIPSNAP1 | 1 |
| NKAIN2   | 1 |
| NKAPL    | 1 |
| NKX2-2   | 1 |
| NKX3-2   | 1 |
| NKX6-1   | 1 |
| NME1     | 1 |
| NME7     | 1 |
| NNAT     | 1 |
| NNMT     | 1 |
| NOG      | 1 |
| NOP9     | 1 |
| NOTCH2   | 1 |
| NPAS3    | 1 |

|         |   |
|---------|---|
| NPAT    | 1 |
| NPEPPS  | 1 |
| NPTX2   | 1 |
| NPY2R   | 1 |
| NR1H3   | 1 |
| NR3C2   | 1 |
| NR5A1   | 1 |
| NRARP   | 1 |
| NRBF2   | 1 |
| NRBP1   | 1 |
| NRCAM   | 1 |
| NRD1    | 1 |
| NRF1    | 1 |
| NRP2    | 1 |
| NRSN1   | 1 |
| NRXN1   | 1 |
| NRXN2   | 1 |
| NSG2    | 1 |
| NSMAF   | 1 |
| NTN4    | 1 |
| NTNG1   | 1 |
| NUCB1   | 1 |
| NUCKS1  | 1 |
| NUDCD2  | 1 |
| NUDCD3  | 1 |
| NUDT13  | 1 |
| NUMB    | 1 |
| NUP54   | 1 |
| OAS2    | 1 |
| OCIAD2  | 1 |
| ODC1    | 1 |
| OGDH    | 1 |
| OPHN1   | 1 |
| ORC5    | 1 |
| OSBP    | 1 |
| OSBPL10 | 1 |
| OSBPL2  | 1 |
| OSBPL6  | 1 |

|           |   |
|-----------|---|
| OSBPL8    | 1 |
| OTC       | 1 |
| OTOGL     | 1 |
| OTUD1     | 1 |
| OTUD4     | 1 |
| OTUD5     | 1 |
| OTUD6B    | 1 |
| OXSR1     | 1 |
| PA2G4     | 1 |
| PABPC1    | 1 |
| PABPC1L2A | 1 |
| PABPC1L2B | 1 |
| PAIP1     | 1 |
| PAIP2     | 1 |
| PAK3      | 1 |
| PALLD     | 1 |
| PAM       | 1 |
| PAOX      | 1 |
| PAPD4     | 1 |
| PAPOLG    | 1 |
| PAQR5     | 1 |
| PARK2     | 1 |
| PARL      | 1 |
| PARP2     | 1 |
| PARPBP    | 1 |
| PARVB     | 1 |
| PAX9      | 1 |
| PC        | 1 |
| PCBD2     | 1 |
| PCBP2     | 1 |
| PCDH12    | 1 |
| PCDH17    | 1 |
| PCDH18    | 1 |
| PCMT1     | 1 |
| PCMTD1    | 1 |
| PCSK5     | 1 |
| PDCD6IP   | 1 |
| PDE11A    | 1 |

|         |   |
|---------|---|
| PDE1B   | 1 |
| PDE4A   | 1 |
| PDE7A   | 1 |
| PDGFRB  | 1 |
| PDHX    | 1 |
| PDIA6   | 1 |
| PDLIM2  | 1 |
| PDPK1   | 1 |
| PDPN    | 1 |
| PDZD2   | 1 |
| PDZD4   | 1 |
| PELI3   | 1 |
| PET117  | 1 |
| PEX16   | 1 |
| PEX19   | 1 |
| PEX5L   | 1 |
| PFKFB3  | 1 |
| PFN2    | 1 |
| PGK1    | 1 |
| PGM3    | 1 |
| PHAX    | 1 |
| PHB2    | 1 |
| PHC3    | 1 |
| PHF14   | 1 |
| PHF17   | 1 |
| PHF20   | 1 |
| PHF20L1 | 1 |
| PHF2    | 1 |
| PHF21A  | 1 |
| PHF21B  | 1 |
| PHF3    | 1 |
| PHF7    | 1 |
| PHLDA3  | 1 |
| PHLDB1  | 1 |
| PHYHIPL | 1 |
| PI4KA   | 1 |
| PIAS2   | 1 |
| PICALM  | 1 |

|         |   |
|---------|---|
| PIGG    | 1 |
| PIGS    | 1 |
| PIGV    | 1 |
| PIK3AP1 | 1 |
| PIKFYVE | 1 |
| PIM1    | 1 |
| PIM2    | 1 |
| PIP4K2B | 1 |
| PIP5K1B | 1 |
| PIRT    | 1 |
| PITX1   | 1 |
| PJA2    | 1 |
| PKP2    | 1 |
| PLA2G10 | 1 |
| PLA2G2C | 1 |
| PLA2G4A | 1 |
| PLAA    | 1 |
| PLAU    | 1 |
| PLCB4   | 1 |
| PLCE1   | 1 |
| PLD1    | 1 |
| PLEK    | 1 |
| PLEKHA6 | 1 |
| PLEKHA7 | 1 |
| PLEKHG3 | 1 |
| PLEKHH2 | 1 |
| PLEKHM1 | 1 |
| PLEKHM3 | 1 |
| PLEKHO2 | 1 |
| PLXNA3  | 1 |
| PNPLA4  | 1 |
| PNPO    | 1 |
| PNRC2   | 1 |
| POLA1   | 1 |
| POLH    | 1 |
| POLQ    | 1 |
| POLR3G  | 1 |
| POLR3H  | 1 |

|          |   |
|----------|---|
| POM121C  | 1 |
| PON2     | 1 |
| POSTN    | 1 |
| POU3F2   | 1 |
| POU3F3   | 1 |
| PPAP2B   | 1 |
| PPFIA1   | 1 |
| PPFIA2   | 1 |
| PPFIBP2  | 1 |
| PPIG     | 1 |
| PPIL1    | 1 |
| PPL      | 1 |
| PPM1D    | 1 |
| PPM1F    | 1 |
| PPP1R13B | 1 |
| PPP1R1C  | 1 |
| PPP1R3B  | 1 |
| PPP1R3D  | 1 |
| PPP1R9A  | 1 |
| PPP1R9B  | 1 |
| PPP2R4   | 1 |
| PPP2R5A  | 1 |
| PPP3R2   | 1 |
| PPP4R4   | 1 |
| PPP6C    | 1 |
| PPP6R1   | 1 |
| PPP6R2   | 1 |
| PPP6R3   | 1 |
| PRAF2    | 1 |
| PRDM16   | 1 |
| PRDM4    | 1 |
| PRIMA1   | 1 |
| PRKAA1   | 1 |
| PRKAR1A  | 1 |
| PRKCA    | 1 |
| PRKCD    | 1 |
| PRKCH    | 1 |
| PRKD1    | 1 |

|           |   |
|-----------|---|
| PRKRIP1   | 1 |
| PRKX      | 1 |
| PROSER1   | 1 |
| PRPF40A   | 1 |
| PRPF4B    | 1 |
| PRPS2     | 1 |
| PRR11     | 1 |
| PRR3      | 1 |
| PRR5L     | 1 |
| PRRC2C    | 1 |
| PRRG3     | 1 |
| PRSS8     | 1 |
| PSD       | 1 |
| PSD3      | 1 |
| PSD4      | 1 |
| PSKH1     | 1 |
| PSME4     | 1 |
| PSPC1     | 1 |
| PTBP2     | 1 |
| PTCHD4    | 1 |
| PTGER4    | 1 |
| PTGES3    | 1 |
| PTGR2     | 1 |
| PTK2B     | 1 |
| PTPN14    | 1 |
| PTPN21    | 1 |
| PTPRE     | 1 |
| PTPRF     | 1 |
| PTPRN2    | 1 |
| PUM1      | 1 |
| PXK       | 1 |
| QDPR      | 1 |
| R3HDM2    | 1 |
| RAB11FIP1 | 1 |
| RAB11FIP2 | 1 |
| RAB11FIP5 | 1 |
| RAB13     | 1 |
| RAB14     | 1 |

|          |   |
|----------|---|
| RAB19    | 1 |
| RAB1A    | 1 |
| RAB27B   | 1 |
| RAB2B    | 1 |
| RAB33B   | 1 |
| RAB34    | 1 |
| RAB35    | 1 |
| RAB37    | 1 |
| RAB3B    | 1 |
| RAB3D    | 1 |
| RAB3IP   | 1 |
| RAB4A    | 1 |
| RAB4B    | 1 |
| RAB5C    | 1 |
| RAB6B    | 1 |
| RAB8A    | 1 |
| RAB9B    | 1 |
| RABGAP1  | 1 |
| RABGEF1  | 1 |
| RACGAP1  | 1 |
| RAD21    | 1 |
| RAD23A   | 1 |
| RAD51D   | 1 |
| RAD54L2  | 1 |
| RAF1     | 1 |
| RALBP1   | 1 |
| RALGAPA2 | 1 |
| RALGDS   | 1 |
| RAN      | 1 |
| RANBP10  | 1 |
| RANBP3   | 1 |
| RAP2A    | 1 |
| RAPGEF3  | 1 |
| RAPGEF5  | 1 |
| RAPGEF6  | 1 |
| RAPH1    | 1 |
| RASD2    | 1 |
| RASGEF1A | 1 |

|         |   |
|---------|---|
| RASSF1  | 1 |
| RASSF6  | 1 |
| RBAK    | 1 |
| RBBP4   | 1 |
| RBBP7   | 1 |
| RBM20   | 1 |
| RBM22   | 1 |
| RBM25   | 1 |
| RBM26   | 1 |
| RBM47   | 1 |
| RBM48   | 1 |
| RBM5    | 1 |
| RBP4    | 1 |
| RC3H1   | 1 |
| RCC2    | 1 |
| RCN3    | 1 |
| RCOR3   | 1 |
| RDH12   | 1 |
| REEP3   | 1 |
| RER1    | 1 |
| REST    | 1 |
| REV1    | 1 |
| RFTN1   | 1 |
| RFTN2   | 1 |
| RFX1    | 1 |
| RFX2    | 1 |
| RFX4    | 1 |
| RGL1    | 1 |
| RGMA    | 1 |
| RGMB    | 1 |
| RGS21   | 1 |
| RGS7BP  | 1 |
| RHBDL1  | 1 |
| RHD     | 1 |
| RHEBL1  | 1 |
| RHOB    | 1 |
| RHOBTB1 | 1 |
| RHOJ    | 1 |

|                |   |
|----------------|---|
| RHOQ           | 1 |
| RIC3           | 1 |
| RIMBP2         | 1 |
| RIMKLB         | 1 |
| RMI2           | 1 |
| RND3           | 1 |
| RNF103-CHMP3   | 1 |
| RNF111         | 1 |
| RNF125         | 1 |
| RNF138         | 1 |
| RNF141         | 1 |
| RNF146         | 1 |
| RNF167         | 1 |
| RNF182         | 1 |
| RNF183         | 1 |
| RNF19A         | 1 |
| RNF208         | 1 |
| RNF216         | 1 |
| RNF222         | 1 |
| RNF32          | 1 |
| RNF40          | 1 |
| RNF4           | 1 |
| RNF5           | 1 |
| RNPEPL1        | 1 |
| ROCK1          | 1 |
| RP11-181C3.1   | 1 |
| RP11-195F19.5  | 1 |
| RP11-644F5.10  | 1 |
| RP11-676J12.7  | 1 |
| RP11-793H13.10 | 1 |
| RPAP3          | 1 |
| RPH3A          | 1 |
| RPL36A-HNRNPH2 | 1 |
| RPN2           | 1 |
| RPRD1B         | 1 |
| RPRM           | 1 |
| RPS6KA2        | 1 |
| RPS6KA5        | 1 |

|         |   |
|---------|---|
| RRAGC   | 1 |
| RRP12   | 1 |
| RSPH10B | 1 |
| RTN1    | 1 |
| RTN4    | 1 |
| RTN4RL1 | 1 |
| RUNDC3B | 1 |
| RUNX3   | 1 |
| RWDD4   | 1 |
| SACM1L  | 1 |
| SAMD10  | 1 |
| SAMHD1  | 1 |
| SAR1A   | 1 |
| SATB1   | 1 |
| SBDS    | 1 |
| SC5D    | 1 |
| SCAMP5  | 1 |
| SCARB1  | 1 |
| SCARB2  | 1 |
| SCARF1  | 1 |
| SCEL    | 1 |
| SCHIP1  | 1 |
| SCML1   | 1 |
| SCML4   | 1 |
| SCN1B   | 1 |
| SCN9A   | 1 |
| SDC2    | 1 |
| SEC11A  | 1 |
| SEC22A  | 1 |
| SEC24C  | 1 |
| SEC24D  | 1 |
| SEC61A1 | 1 |
| SEC61A2 | 1 |
| SEL1L   | 1 |
| SEL1L3  | 1 |
| SELK    | 1 |
| SEMA3C  | 1 |
| SEMA4A  | 1 |

|          |   |
|----------|---|
| SEMA4B   | 1 |
| SEMA6A   | 1 |
| SEMA6C   | 1 |
| SEMA7A   | 1 |
| SEPN1    | 1 |
| SEPT11   | 1 |
| SEPT3    | 1 |
| SEPT8    | 1 |
| SEPT9    | 1 |
| SERPINE1 | 1 |
| SERPINH1 | 1 |
| SERTAD1  | 1 |
| SESN1    | 1 |
| SESN2    | 1 |
| SETD9    | 1 |
| SEZ6L2   | 1 |
| SF1      | 1 |
| SFRP4    | 1 |
| SGCD     | 1 |
| SGK1     | 1 |
| SGMS1    | 1 |
| SGOL1    | 1 |
| SGTB     | 1 |
| SH2D4A   | 1 |
| SH3BGRL  | 1 |
| SH3BGRL2 | 1 |
| SH3BGRL3 | 1 |
| SH3BP5   | 1 |
| SH3D19   | 1 |
| SH3GLB2  | 1 |
| SH3PXD2B | 1 |
| SH3RF2   | 1 |
| SHANK2   | 1 |
| SHANK3   | 1 |
| SHC4     | 1 |
| SHE      | 1 |
| SHFM1    | 1 |
| SHOX     | 1 |

|          |   |
|----------|---|
| SHROOM2  | 1 |
| SHROOM4  | 1 |
| SIAE     | 1 |
| SIAH3    | 1 |
| SIK1     | 1 |
| SIK2     | 1 |
| SIM1     | 1 |
| SIRPA    | 1 |
| SIRT1    | 1 |
| SIRT5    | 1 |
| SIVA1    | 1 |
| SIX1     | 1 |
| SIX2     | 1 |
| SIX4     | 1 |
| SLA      | 1 |
| SLC12A5  | 1 |
| SLC12A6  | 1 |
| SLC12A7  | 1 |
| SLC16A2  | 1 |
| SLC16A6  | 1 |
| SLC17A6  | 1 |
| SLC18A2  | 1 |
| SLC1A2   | 1 |
| SLC20A2  | 1 |
| SLC23A2  | 1 |
| SLC23A3  | 1 |
| SLC24A2  | 1 |
| SLC25A16 | 1 |
| SLC25A25 | 1 |
| SLC25A34 | 1 |
| SLC25A36 | 1 |
| SLC25A37 | 1 |
| SLC25A44 | 1 |
| SLC25A53 | 1 |
| SLC25A6  | 1 |
| SLC26A7  | 1 |
| SLC27A1  | 1 |
| SLC2A1   | 1 |

|          |   |
|----------|---|
| SLC2A4RG | 1 |
| SLC2A8   | 1 |
| SLC30A10 | 1 |
| SLC30A9  | 1 |
| SLC31A2  | 1 |
| SLC33A1  | 1 |
| SLC35A1  | 1 |
| SLC35A2  | 1 |
| SLC35A3  | 1 |
| SLC35B4  | 1 |
| SLC35C1  | 1 |
| SLC35C2  | 1 |
| SLC35D1  | 1 |
| SLC35E2B | 1 |
| SLC35F3  | 1 |
| SLC37A1  | 1 |
| SLC38A2  | 1 |
| SLC39A13 | 1 |
| SLC39A9  | 1 |
| SLC41A1  | 1 |
| SLC43A2  | 1 |
| SLC44A1  | 1 |
| SLC44A2  | 1 |
| SLC4A10  | 1 |
| SLC4A7   | 1 |
| SLC6A11  | 1 |
| SLC6A9   | 1 |
| SLC7A6   | 1 |
| SLC7A8   | 1 |
| SLC9A1   | 1 |
| SLC9A3R1 | 1 |
| SLC9A8   | 1 |
| SLCO2A1  | 1 |
| SLCO3A1  | 1 |
| SLFN12   | 1 |
| SLX4     | 1 |
| SMAD1    | 1 |
| SMAGP    | 1 |

|         |   |
|---------|---|
| SMAP1   | 1 |
| SMARCA2 | 1 |
| SMARCA5 | 1 |
| SMARCC2 | 1 |
| SMCO1   | 1 |
| SMG5    | 1 |
| SMOC1   | 1 |
| SMOC2   | 1 |
| SMURF1  | 1 |
| SMYD5   | 1 |
| SNAI2   | 1 |
| SNAP25  | 1 |
| SNCAIP  | 1 |
| SNIP1   | 1 |
| SNTB1   | 1 |
| SNTG1   | 1 |
| SNX13   | 1 |
| SNX18   | 1 |
| SNX22   | 1 |
| SNX4    | 1 |
| SOCS2   | 1 |
| SORL1   | 1 |
| SOS2    | 1 |
| SOX11   | 1 |
| SOX2    | 1 |
| SOX21   | 1 |
| SP3     | 1 |
| SP6     | 1 |
| SPAG1   | 1 |
| SPAG9   | 1 |
| SPAST   | 1 |
| SPATA12 | 1 |
| SPCS1   | 1 |
| SPECC1  | 1 |
| SPECC1L | 1 |
| SPG20   | 1 |
| SPHK2   | 1 |
| SPIN3   | 1 |

|            |   |
|------------|---|
| SPP1       | 1 |
| SPPL2A     | 1 |
| SPRED2     | 1 |
| SPRTN      | 1 |
| SPRYD3     | 1 |
| SPSB4      | 1 |
| SPTBN2     | 1 |
| SRCIN1     | 1 |
| SRGAP2     | 1 |
| SRL        | 1 |
| SRM        | 1 |
| SRRM4      | 1 |
| SRSF10     | 1 |
| SRSF11     | 1 |
| SRSF5      | 1 |
| SSBP3-AS1  | 1 |
| SSH3       | 1 |
| SSR1       | 1 |
| SSTR1      | 1 |
| ST3GAL2    | 1 |
| ST3GAL5    | 1 |
| ST6GALNAC3 | 1 |
| ST8SIA3    | 1 |
| STAG1      | 1 |
| STAMBPL1   | 1 |
| STAU1      | 1 |
| STC1       | 1 |
| STC2       | 1 |
| STEAP2     | 1 |
| STK17B     | 1 |
| STK19      | 1 |
| STK32B     | 1 |
| STK33      | 1 |
| STK39      | 1 |
| STMND1     | 1 |
| STRADB     | 1 |
| STRN3      | 1 |
| STX12      | 1 |



|          |   |
|----------|---|
| STX18    | 1 |
| STX6     | 1 |
| STXBP6   | 1 |
| SUDS3    | 1 |
| SUGT1    | 1 |
| SUN1     | 1 |
| SUPT6H   | 1 |
| SUV420H2 | 1 |
| SUZ12    | 1 |
| SV2A     | 1 |
| SWAP70   | 1 |
| SYCN     | 1 |
| SYN1     | 1 |
| SYNE1    | 1 |
| SYNE2    | 1 |
| SYNPO2   | 1 |
| SYNPR    | 1 |
| SYP      | 1 |
| SYPL1    | 1 |
| SYPL2    | 1 |
| SYS1     | 1 |
| SYT3     | 1 |
| SZRD1    | 1 |
| SZT2     | 1 |
| TADA2B   | 1 |
| TAF13    | 1 |
| TAF15    | 1 |
| TAF4B    | 1 |
| TAF7L    | 1 |
| TARBP1   | 1 |
| TARDBP   | 1 |
| TARS     | 1 |
| TAT      | 1 |
| TBC1D1   | 1 |
| TBC1D14  | 1 |
| TBC1D16  | 1 |
| TBC1D22B | 1 |
| TBC1D24  | 1 |

|          |   |
|----------|---|
| TBC1D25  | 1 |
| TBC1D2B  | 1 |
| TBC1D30  | 1 |
| TBC1D4   | 1 |
| TBC1D8   | 1 |
| TBC1D9   | 1 |
| TBK1     | 1 |
| TBL1XR1  | 1 |
| TBPL1    | 1 |
| TBX1     | 1 |
| TBXA2R   | 1 |
| TCEB3    | 1 |
| TCF19    | 1 |
| TCF23    | 1 |
| TCF7     | 1 |
| TCP11L2  | 1 |
| TDRD6    | 1 |
| TECTB    | 1 |
| TEF      | 1 |
| TESK2    | 1 |
| TEX2     | 1 |
| TFAM     | 1 |
| TFDP2    | 1 |
| TGFBRAP1 | 1 |
| TGIF1    | 1 |
| TGM3     | 1 |
| TGM5     | 1 |
| TGOLN2   | 1 |
| THBS3    | 1 |
| THBS4    | 1 |
| THTPA    | 1 |
| TIAF1    | 1 |
| TIAL1    | 1 |
| TIAM1    | 1 |
| TLCD2    | 1 |
| TLL1     | 1 |
| TLN1     | 1 |
| TLN2     | 1 |

|          |   |
|----------|---|
| TM9SF4   | 1 |
| TMBIM6   | 1 |
| TMED2    | 1 |
| TMED4    | 1 |
| TMED8    | 1 |
| TMEFF1   | 1 |
| TMEM106A | 1 |
| TMEM120B | 1 |
| TMEM131  | 1 |
| TMEM134  | 1 |
| TMEM150C | 1 |
| TMEM159  | 1 |
| TMEM161B | 1 |
| TMEM170B | 1 |
| TMEM181  | 1 |
| TMEM194B | 1 |
| TMEM196  | 1 |
| TMEM198  | 1 |
| TMEM216  | 1 |
| TMEM218  | 1 |
| TMEM231  | 1 |
| TMEM242  | 1 |
| TMEM25   | 1 |
| TMEM59   | 1 |
| TMEM63B  | 1 |
| TMEM67   | 1 |
| TMEM68   | 1 |
| TMEM71   | 1 |
| TMEM75   | 1 |
| TMEM86A  | 1 |
| TMEM9    | 1 |
| TMEM92   | 1 |
| TMF1     | 1 |
| TMOD1    | 1 |
| TMUB2    | 1 |
| TMX3     | 1 |
| TNF      | 1 |
| TNFAIP1  | 1 |

|           |   |
|-----------|---|
| TNFAIP8   | 1 |
| TNFRSF11B | 1 |
| TNFRSF12A | 1 |
| TNFRSF19  | 1 |
| TNFSF11   | 1 |
| TNFSF8    | 1 |
| TNIP1     | 1 |
| TNPO2     | 1 |
| TOB1      | 1 |
| TOM1L2    | 1 |
| TOMM40    | 1 |
| TOP1      | 1 |
| TOR1B     | 1 |
| TOX2      | 1 |
| TOX3      | 1 |
| TP53INP2  | 1 |
| TP73      | 1 |
| TPRG1     | 1 |
| TPRG1L    | 1 |
| TRIB3     | 1 |
| TRIM23    | 1 |
| TRIM3     | 1 |
| TRIM33    | 1 |
| TRIM37    | 1 |
| TRIM52    | 1 |
| TRIM66    | 1 |
| TRIO      | 1 |
| TRIP4     | 1 |
| TRIQK     | 1 |
| TRMT10B   | 1 |
| TRMT1L    | 1 |
| TRPC3     | 1 |
| TRPM7     | 1 |
| TRPV3     | 1 |
| TRRAP     | 1 |
| TSFM      | 1 |
| TSHZ1     | 1 |
| TSHZ2     | 1 |

|         |   |
|---------|---|
| TSNAX   | 1 |
| TSPAN3  | 1 |
| TSPAN33 | 1 |
| TSPAN4  | 1 |
| TSPAN9  | 1 |
| TSPYL2  | 1 |
| TTBK1   | 1 |
| TTC16   | 1 |
| TTC17   | 1 |
| TTC39B  | 1 |
| TTC9    | 1 |
| TTC9C   | 1 |
| TTLL7   | 1 |
| TUBB    | 1 |
| TULP4   | 1 |
| TWISTNB | 1 |
| TXNDC12 | 1 |
| TXNL1   | 1 |
| TXNRD1  | 1 |
| TYSND1  | 1 |
| U2AF2   | 1 |
| U2SURP  | 1 |
| UBA6    | 1 |
| UBALD1  | 1 |
| UBAP2L  | 1 |
| UBASH3B | 1 |
| UBE2A   | 1 |
| UBE2B   | 1 |
| UBE2D4  | 1 |
| UBE2F   | 1 |
| UBE2J1  | 1 |
| UBE2L3  | 1 |
| UBE2N   | 1 |
| UBE2Q2  | 1 |
| UBL3    | 1 |
| UBN1    | 1 |
| UBP1    | 1 |
| UBR2    | 1 |

|           |   |
|-----------|---|
| UBXN10    | 1 |
| UBXN2B    | 1 |
| UBXN7     | 1 |
| UCK1      | 1 |
| UCP2      | 1 |
| UCP3      | 1 |
| UHRF1BP1L | 1 |
| UNC13C    | 1 |
| UNC93B1   | 1 |
| URM1      | 1 |
| USF2      | 1 |
| USP2      | 1 |
| USP36     | 1 |
| USP37     | 1 |
| USP42     | 1 |
| USP5      | 1 |
| USP9X     | 1 |
| USP9Y     | 1 |
| VASH1     | 1 |
| VAT1      | 1 |
| VCAM1     | 1 |
| VCAN      | 1 |
| VCL       | 1 |
| VEZF1     | 1 |
| VGFB      | 1 |
| VHL       | 1 |
| VPS28     | 1 |
| VPS35     | 1 |
| VPS37A    | 1 |
| VPS37D    | 1 |
| VPS4B     | 1 |
| VSIG10    | 1 |
| VSIG10L   | 1 |
| VSTM2B    | 1 |
| WASF1     | 1 |
| WASF2     | 1 |
| WBP1L     | 1 |
| WBP2      | 1 |

|         |   |
|---------|---|
| WBP4    | 1 |
| WBSCR27 | 1 |
| WDR26   | 1 |
| WDR44   | 1 |
| WDR45   | 1 |
| WDR45B  | 1 |
| WDR47   | 1 |
| WDR5    | 1 |
| WDR55   | 1 |
| WDR76   | 1 |
| WDR91   | 1 |
| WEE1    | 1 |
| WIF1    | 1 |
| WIPF1   | 1 |
| WIPF3   | 1 |
| WISP1   | 1 |
| WIZ     | 1 |
| WNT10A  | 1 |
| WNT3    | 1 |
| WNT4    | 1 |
| WNT7B   | 1 |
| WNT8B   | 1 |
| WSB1    | 1 |
| WSB2    | 1 |
| WSCD1   | 1 |
| WSCD2   | 1 |
| WT1     | 1 |
| WTIP    | 1 |
| WWC1    | 1 |
| WWP1    | 1 |
| XBP1    | 1 |
| XPO4    | 1 |
| XPO7    | 1 |
| YIF1A   | 1 |
| YLPM1   | 1 |
| YTHDC2  | 1 |
| YWHAB   | 1 |
| ZBED3   | 1 |

|          |   |
|----------|---|
| ZBTB11   | 1 |
| ZBTB14   | 1 |
| ZBTB34   | 1 |
| ZBTB40   | 1 |
| ZBTB43   | 1 |
| ZBTB44   | 1 |
| ZBTB46   | 1 |
| ZBTB47   | 1 |
| ZBTB6    | 1 |
| ZC2HC1C  | 1 |
| ZC3H15   | 1 |
| ZC3H8    | 1 |
| ZCCHC24  | 1 |
| ZDHHC14  | 1 |
| ZDHHC18  | 1 |
| ZDHHC2   | 1 |
| ZDHHC23  | 1 |
| ZEB1     | 1 |
| ZFAND4   | 1 |
| ZFC3H1   | 1 |
| ZFHX3    | 1 |
| ZFHX4    | 1 |
| ZFP1     | 1 |
| ZFP14    | 1 |
| ZFP3     | 1 |
| ZFP69B   | 1 |
| ZFP82    | 1 |
| ZFX      | 1 |
| ZFYVE9   | 1 |
| ZHX1     | 1 |
| ZHX2     | 1 |
| ZIC5     | 1 |
| ZKSCAN1  | 1 |
| ZMPSTE24 | 1 |
| ZNF136   | 1 |
| ZNF189   | 1 |
| ZNF23    | 1 |
| ZNF236   | 1 |

|         |   |
|---------|---|
| ZNF266  | 1 |
| ZNF283  | 1 |
| ZNF33B  | 1 |
| ZNF367  | 1 |
| ZNF394  | 1 |
| ZNF395  | 1 |
| ZNF398  | 1 |
| ZNF445  | 1 |
| ZNF469  | 1 |
| ZNF470  | 1 |
| ZNF496  | 1 |
| ZNF527  | 1 |
| ZNF536  | 1 |
| ZNF562  | 1 |
| ZNF572  | 1 |
| ZNF597  | 1 |
| ZNF608  | 1 |
| ZNF613  | 1 |
| ZNF699  | 1 |
| ZNF706  | 1 |
| ZNF711  | 1 |
| ZNF780B | 1 |
| ZNF787  | 1 |
| ZNF804A | 1 |
| ZNRF1   | 1 |
| ZNRF3   | 1 |
| ZRANB2  | 1 |
| ZSCAN12 | 1 |
| ZSWIM1  | 1 |
| ZXDA    | 1 |
| ZXDB    | 1 |
| ZZEF1   | 1 |
| ZZZ3    | 1 |

Supplementary Table 3. Predicted target genes of all detected miRNAs from Table 3.

| Target Gene | Number of miRNAs |
|-------------|------------------|
| ZBTB20      | 12               |
| QKI         | 11               |
| DCP2        | 10               |
| SZRD1       | 10               |
| CADM1       | 7                |
| KMT2A       | 7                |
| NFAT5       | 7                |
| RPS6KA5     | 7                |
| ADAMTS5     | 6                |
| AGO2        | 6                |
| CSF1        | 6                |
| MTF1        | 6                |
| MTMR9       | 6                |
| NSD1        | 6                |
| NUDT3       | 6                |
| SLC5A3      | 6                |
| TXNIP       | 6                |
| UBN2        | 6                |
| ZNF618      | 6                |
| C16orf52    | 5                |
| C18orf25    | 5                |
| CBX5        | 5                |
| CFL2        | 5                |
| CPEB4       | 5                |
| DCUN1D4     | 5                |
| ITGA5       | 5                |
| ITGA9       | 5                |
| KAT7        | 5                |
| KCND3       | 5                |
| KIAA0232    | 5                |
| MGAT4A      | 5                |
| MITF        | 5                |

|          |   |
|----------|---|
| MSI2     | 5 |
| MYO9A    | 5 |
| ONECUT2  | 5 |
| PDE4D    | 5 |
| PNRC2    | 5 |
| ROBO1    | 5 |
| RSBN1L   | 5 |
| RYBP     | 5 |
| SERBP1   | 5 |
| SFMBT1   | 5 |
| TEAD1    | 5 |
| TGIF2    | 5 |
| TMED7    | 5 |
| TNPO1    | 5 |
| UBE2D3   | 5 |
| ZFHX3    | 5 |
| ABCA1    | 4 |
| ACVR2B   | 4 |
| AGO1     | 4 |
| AGO3     | 4 |
| ARHGAP21 | 4 |
| ARRDC3   | 4 |
| ATP11A   | 4 |
| ATP6AP2  | 4 |
| ATP8A1   | 4 |
| B4GALT5  | 4 |
| BAZ2A    | 4 |
| BAZ2B    | 4 |
| BCL2L11  | 4 |
| BHLHE41  | 4 |
| C5orf30  | 4 |
| C7orf60  | 4 |
| CBLB     | 4 |

|          |   |
|----------|---|
| CDK19    | 4 |
| CDK5R1   | 4 |
| CLCN3    | 4 |
| CNNM2    | 4 |
| DYNLL2   | 4 |
| DYRK1A   | 4 |
| E2F3     | 4 |
| EFNB2    | 4 |
| ELAVL4   | 4 |
| FBXO28   | 4 |
| FIGN     | 4 |
| FRYL     | 4 |
| GDF6     | 4 |
| GRID2    | 4 |
| GRIN2B   | 4 |
| GRIN2D   | 4 |
| HLA-DQB2 | 4 |
| HOMER1   | 4 |
| HSPA4L   | 4 |
| INO80    | 4 |
| JHDM1D   | 4 |
| JMJD1C   | 4 |
| KCNJ6    | 4 |
| KCNN3    | 4 |
| KCNQ4    | 4 |
| KLF6     | 4 |
| LCOR     | 4 |
| LEPROTL1 | 4 |
| LIN28B   | 4 |
| MAP3K2   | 4 |
| MAPK1    | 4 |
| MARCH3   | 4 |
| MBOAT2   | 4 |
| MDGA2    | 4 |
| MDM4     | 4 |

|          |   |
|----------|---|
| MED12L   | 4 |
| MEOX2    | 4 |
| MIER1    | 4 |
| MOB1B    | 4 |
| MXD1     | 4 |
| NAA15    | 4 |
| NCAM1    | 4 |
| NOVA1    | 4 |
| NPTN     | 4 |
| OSBPL11  | 4 |
| PITPNM2  | 4 |
| PPARGC1A | 4 |
| PPP1R10  | 4 |
| PTEN     | 4 |
| RAB14    | 4 |
| RBM24    | 4 |
| RC3H1    | 4 |
| RICTOR   | 4 |
| RMND5A   | 4 |
| RNF38    | 4 |
| ROCK1    | 4 |
| S1PR1    | 4 |
| SIRT7    | 4 |
| SLC24A4  | 4 |
| SLC7A11  | 4 |
| SMAD2    | 4 |
| SMURF2   | 4 |
| SNN      | 4 |
| SOS2     | 4 |
| SOX11    | 4 |
| SPTY2D1  | 4 |
| SS18     | 4 |
| SYT1     | 4 |
| TAF4     | 4 |
| TCF4     | 4 |

|             |   |
|-------------|---|
| TNRC6A      | 4 |
| TNRC6C      | 4 |
| UBE2W       | 4 |
| UHMK1       | 4 |
| WDR47       | 4 |
| WNT1        | 4 |
| ZC3H12C     | 4 |
| ZDHHC7      | 4 |
| ABL2        | 3 |
| AC140061.12 | 3 |
| ACHE        | 3 |
| ACVR1       | 3 |
| ADAM10      | 3 |
| ADAM22      | 3 |
| ADCY2       | 3 |
| AFF3        | 3 |
| AGFG1       | 3 |
| AKIRIN1     | 3 |
| ANK2        | 3 |
| ANKFY1      | 3 |
| ARF4        | 3 |
| ARFGEF1     | 3 |
| ARID3A      | 3 |
| ARL8B       | 3 |
| ATXN3       | 3 |
| BBX         | 3 |
| BICC1       | 3 |
| BMP3        | 3 |
| BNIP2       | 3 |
| BRWD3       | 3 |
| C15orf27    | 3 |
| C16orf70    | 3 |
| CACNG2      | 3 |
| CAND1       | 3 |
| CCDC6       | 3 |

|         |   |
|---------|---|
| CCDC71  | 3 |
| CCNK    | 3 |
| CHD1    | 3 |
| CHD9    | 3 |
| CHST1   | 3 |
| CLCN5   | 3 |
| CLCN6   | 3 |
| CNOT6   | 3 |
| CNOT7   | 3 |
| CNR1    | 3 |
| CPD     | 3 |
| CSNK2A1 | 3 |
| DCP1A   | 3 |
| DDAH1   | 3 |
| DDX6    | 3 |
| DLG2    | 3 |
| DLL4    | 3 |
| DPYSL5  | 3 |
| DSTYK   | 3 |
| DTX4    | 3 |
| DUSP1   | 3 |
| E2F7    | 3 |
| EGR3    | 3 |
| EIF4E3  | 3 |
| ELAVL2  | 3 |
| ELMO1   | 3 |
| EPB41L1 | 3 |
| F3      | 3 |
| FAM184A | 3 |
| FBXO33  | 3 |
| FBXW7   | 3 |
| FCHSD1  | 3 |
| FMR1    | 3 |
| FOSB    | 3 |
| FOXF1   | 3 |



|          |   |
|----------|---|
| FUBP1    | 3 |
| FUT9     | 3 |
| FXR1     | 3 |
| GAB1     | 3 |
| GGA2     | 3 |
| GMFB     | 3 |
| GRIN2A   | 3 |
| H2AFY    | 3 |
| HBEGF    | 3 |
| HIPK3    | 3 |
| HMGB3    | 3 |
| IGF1     | 3 |
| IL6ST    | 3 |
| ITSN2    | 3 |
| KDM2B    | 3 |
| KDM5A    | 3 |
| KIAA1045 | 3 |
| KIAA1468 | 3 |
| KIAA1549 | 3 |
| KLF4     | 3 |
| KLHL18   | 3 |
| KMT2C    | 3 |
| KPNA1    | 3 |
| KSR1     | 3 |
| LDLR     | 3 |
| LIN28A   | 3 |
| LMTK2    | 3 |
| LYSMD3   | 3 |
| MAFG     | 3 |
| MAP3K4   | 3 |
| MED1     | 3 |
| MET      | 3 |
| MLLT10   | 3 |
| MMD      | 3 |
| MNT      | 3 |

|         |   |
|---------|---|
| MPP2    | 3 |
| MPPED2  | 3 |
| MTSS1L  | 3 |
| MYBL1   | 3 |
| NCOA1   | 3 |
| NCS1    | 3 |
| NEURL1B | 3 |
| NEURL4  | 3 |
| NHS     | 3 |
| NOL4    | 3 |
| NPTX1   | 3 |
| NRARP   | 3 |
| NRP1    | 3 |
| OTUD4   | 3 |
| OTX2    | 3 |
| PAIP2   | 3 |
| PAN3    | 3 |
| PHF20   | 3 |
| PHF6    | 3 |
| PIK3C2A | 3 |
| PIK3CA  | 3 |
| PLAA    | 3 |
| PLK2    | 3 |
| PPAP2B  | 3 |
| PPFIA2  | 3 |
| PPP1R9A | 3 |
| PSEN1   | 3 |
| PTPRD   | 3 |
| RAB24   | 3 |
| RAB39B  | 3 |
| RAI14   | 3 |
| RARA    | 3 |
| RLIM    | 3 |
| RNPEPL1 | 3 |
| RORA    | 3 |

|          |   |
|----------|---|
| RORB     | 3 |
| RXRA     | 3 |
| SATB1    | 3 |
| SBNO1    | 3 |
| SGMS1    | 3 |
| SH3PXD2A | 3 |
| SIK1     | 3 |
| SLC35F1  | 3 |
| SLC6A1   | 3 |
| SLC7A5   | 3 |
| SLITRK3  | 3 |
| SMAD5    | 3 |
| SMIM17   | 3 |
| SNAP91   | 3 |
| SOBP     | 3 |
| SOCS5    | 3 |
| SORL1    | 3 |
| SOS1     | 3 |
| SOX5     | 3 |
| SPRY3    | 3 |
| SRPK2    | 3 |
| STK38L   | 3 |
| STOX2    | 3 |
| SYT2     | 3 |
| TBPL1    | 3 |
| TERF2    | 3 |
| TFDP2    | 3 |
| TFRC     | 3 |
| TMEM170A | 3 |
| TMSB10   | 3 |
| TNRC6B   | 3 |
| TRIP12   | 3 |
| TRPS1    | 3 |
| TRPV3    | 3 |
| TXLNG    | 3 |

|            |   |
|------------|---|
| UBE2D1     | 3 |
| UGCG       | 3 |
| UGT8       | 3 |
| VANGL1     | 3 |
| VASH2      | 3 |
| WAPAL      | 3 |
| YPEL3      | 3 |
| YWHAB      | 3 |
| ZADH2      | 3 |
| ZBTB37     | 3 |
| ZBTB7A     | 3 |
| ZCCHC2     | 3 |
| ZNF704     | 3 |
| ZNF784     | 3 |
| ABCB10     | 2 |
| ABCB7      | 2 |
| ABCD3      | 2 |
| AC012215.1 | 2 |
| AC068987.1 | 2 |
| AC135178.1 | 2 |
| ACVR2A     | 2 |
| ADAM17     | 2 |
| ADAMTS15   | 2 |
| ADAMTS18   | 2 |
| ADAMTS19   | 2 |
| ADCY6      | 2 |
| AFF4       | 2 |
| AGO4       | 2 |
| AHDC1      | 2 |
| AJUBA      | 2 |
| AKAP1      | 2 |
| ALCAM      | 2 |
| ALG9       | 2 |
| AMER1      | 2 |
| AMER2      | 2 |

|          |   |
|----------|---|
| AMMECR1  | 2 |
| ANKRD13A | 2 |
| ANKRD52  | 2 |
| AP1G1    | 2 |
| AP4E1    | 2 |
| APPBP2   | 2 |
| AQP11    | 2 |
| ARAP2    | 2 |
| ARF3     | 2 |
| ARFIP1   | 2 |
| ARHGAP12 | 2 |
| ARHGAP20 | 2 |
| ARHGEF12 | 2 |
| ARHGEF17 | 2 |
| ARID2    | 2 |
| ARL6IP1  | 2 |
| ARPP19   | 2 |
| ARRDC4   | 2 |
| ASAP1    | 2 |
| ASPH     | 2 |
| ATG14    | 2 |
| ATG4D    | 2 |
| ATP2A2   | 2 |
| ATP2B4   | 2 |
| ATP7A    | 2 |
| ATXN1    | 2 |
| ATXN7L1  | 2 |
| B4GALT2  | 2 |
| B4GALT6  | 2 |
| BACH2    | 2 |
| BAI3     | 2 |
| BARHL2   | 2 |
| BCL2L13  | 2 |
| BCL2L2   | 2 |
| BCL7A    | 2 |

|           |   |
|-----------|---|
| BCL7B     | 2 |
| BEND4     | 2 |
| BEST1     | 2 |
| BMP2K     | 2 |
| BRPF1     | 2 |
| BTAF1     | 2 |
| BTBD3     | 2 |
| BTBD7     | 2 |
| BTG2      | 2 |
| BZRAP1    | 2 |
| C11orf87  | 2 |
| C12orf79  | 2 |
| C17orf85  | 2 |
| C1GALT1   | 2 |
| C1orf21   | 2 |
| C1orf35   | 2 |
| C1orf50   | 2 |
| C20orf112 | 2 |
| C2CD2     | 2 |
| C2orf91   | 2 |
| C3orf58   | 2 |
| C5orf24   | 2 |
| C6orf222  | 2 |
| C6orf62   | 2 |
| C7orf71   | 2 |
| CA10      | 2 |
| CABLES2   | 2 |
| CABP7     | 2 |
| CALR      | 2 |
| CAMK2A    | 2 |
| CAMKK1    | 2 |
| CAMSAP2   | 2 |
| CANX      | 2 |
| CAPRIN1   | 2 |
| CAST      | 2 |

|          |   |
|----------|---|
| CASZ1    | 2 |
| CAV2     | 2 |
| CCDC144A | 2 |
| CCDC85A  | 2 |
| CCDC85C  | 2 |
| CCNA2    | 2 |
| CCT6A    | 2 |
| CDC14A   | 2 |
| CDC25B   | 2 |
| CDH20    | 2 |
| CDH7     | 2 |
| CDK13    | 2 |
| CDK14    | 2 |
| CDK6     | 2 |
| CDK8     | 2 |
| CDKN1B   | 2 |
| CDS1     | 2 |
| CEBPG    | 2 |
| CECR6    | 2 |
| CEP55    | 2 |
| CEP63    | 2 |
| CEP72    | 2 |
| CERS5    | 2 |
| CERS6    | 2 |
| CHD7     | 2 |
| CHMP4B   | 2 |
| CHRN2    | 2 |
| CLOCK    | 2 |
| CLSTN2   | 2 |
| CLVS2    | 2 |
| CNIH4    | 2 |
| CNTN4    | 2 |
| COG5     | 2 |
| COL2A1   | 2 |
| COL4A1   | 2 |

|               |   |
|---------------|---|
| COL6A3        | 2 |
| CPEB3         | 2 |
| CPT1A         | 2 |
| CS            | 2 |
| CTD-2140B24.4 | 2 |
| CTDSP2        | 2 |
| CTDSPL        | 2 |
| CTDSPL2       | 2 |
| CTSA          | 2 |
| CTTNBP2NL     | 2 |
| CUL5          | 2 |
| CXorf23       | 2 |
| CYB561D1      | 2 |
| CYB5R4        | 2 |
| CYTH3         | 2 |
| DCAF7         | 2 |
| DCBLD2        | 2 |
| DCUN1D3       | 2 |
| DEDD          | 2 |
| DENND4C       | 2 |
| DENND5B       | 2 |
| DEPDC1B       | 2 |
| DGCR8         | 2 |
| DHRS13        | 2 |
| DICER1        | 2 |
| DLL1          | 2 |
| DMPK          | 2 |
| DMRTA2        | 2 |
| DMXL1         | 2 |
| DNAJB12       | 2 |
| DNAJB4        | 2 |
| DNAJC16       | 2 |
| DNAJC18       | 2 |
| DNMT1         | 2 |
| DNMT3A        | 2 |

|        |   |
|--------|---|
| DOCK11 | 2 |
| DOCK6  | 2 |
| DOT1L  | 2 |
| DPP9   | 2 |
| DRGX   | 2 |
| DSC2   | 2 |
| DUSP16 | 2 |
| DUSP8  | 2 |
| DYRK1B | 2 |
| DYRK2  | 2 |
| EDNRA  | 2 |
| EFR3A  | 2 |
| EGFR   | 2 |
| EHF    | 2 |
| EML6   | 2 |
| EMX2   | 2 |
| ENAH   | 2 |
| ENTPD5 | 2 |
| EOGT   | 2 |
| EPAS1  | 2 |
| EPC2   | 2 |
| EPHA8  | 2 |
| EPN2   | 2 |
| EPS15  | 2 |
| ERBB3  | 2 |
| ERLIN1 | 2 |
| ERRFI1 | 2 |
| ESCO1  | 2 |
| ESR1   | 2 |
| ESRRG  | 2 |
| ETNK1  | 2 |
| ETV1   | 2 |
| ETV3   | 2 |
| ETV5   | 2 |
| EXTL3  | 2 |

|          |   |
|----------|---|
| EYA3     | 2 |
| EYA4     | 2 |
| FAM104A  | 2 |
| FAM104B  | 2 |
| FAM105B  | 2 |
| FAM133A  | 2 |
| FAM133B  | 2 |
| FAM134C  | 2 |
| FAM161A  | 2 |
| FAM168B  | 2 |
| FAM21A   | 2 |
| FAM21B   | 2 |
| FAM21C   | 2 |
| FAM21D   | 2 |
| FAM43A   | 2 |
| FAM46A   | 2 |
| FAM78A   | 2 |
| FAM81A   | 2 |
| FAM84B   | 2 |
| FANCA    | 2 |
| FBN1     | 2 |
| FBN3     | 2 |
| FBXL19   | 2 |
| FBXO11   | 2 |
| FEZ2     | 2 |
| FGF2     | 2 |
| FLJ00418 | 2 |
| FLOT2    | 2 |
| FMNL3    | 2 |
| FNBP1L   | 2 |
| FOKK2    | 2 |
| FOXP2    | 2 |
| FRMPD3   | 2 |
| GABRA1   | 2 |
| GABRB1   | 2 |

|          |   |
|----------|---|
| GADD45A  | 2 |
| GAP43    | 2 |
| GAPVD1   | 2 |
| GAS1     | 2 |
| GATAD2A  | 2 |
| GATAD2B  | 2 |
| GJD2     | 2 |
| GLRX5    | 2 |
| GNA13    | 2 |
| GPAM     | 2 |
| GPATCH2  | 2 |
| GPATCH8  | 2 |
| GPCPD1   | 2 |
| GPM6A    | 2 |
| GPR116   | 2 |
| GPR137C  | 2 |
| GPR180   | 2 |
| GPRIN2   | 2 |
| GRAMD1B  | 2 |
| GREM1    | 2 |
| GRIK3    | 2 |
| GSPT1    | 2 |
| GSR      | 2 |
| GTF2H1   | 2 |
| HDGF     | 2 |
| HECW2    | 2 |
| HIF1AN   | 2 |
| HLA-DQB1 | 2 |
| HLF      | 2 |
| HMGA2    | 2 |
| HOXA5    | 2 |
| HOXC8    | 2 |
| HSP90B1  | 2 |
| IL15     | 2 |
| IL18BP   | 2 |

|           |   |
|-----------|---|
| ING2      | 2 |
| INHBB     | 2 |
| INSIG2    | 2 |
| IPO5      | 2 |
| ISM1      | 2 |
| ITFG3     | 2 |
| ITGA11    | 2 |
| ITGB8     | 2 |
| ITPK1     | 2 |
| JARID2    | 2 |
| JMY       | 2 |
| JPH3      | 2 |
| KANSL1    | 2 |
| KCMF1     | 2 |
| KCNH1     | 2 |
| KCNK10    | 2 |
| KCNK2     | 2 |
| KDM6B     | 2 |
| KIAA0226  | 2 |
| KIAA1217  | 2 |
| KIAA1239  | 2 |
| KIAA1324L | 2 |
| KIT       | 2 |
| KITLG     | 2 |
| KLC2      | 2 |
| KLF5      | 2 |
| KLHL5     | 2 |
| KPNA4     | 2 |
| LAMA4     | 2 |
| LBR       | 2 |
| LGALS8    | 2 |
| LHX1      | 2 |
| LIMD2     | 2 |
| LIPA      | 2 |
| LMAN1     | 2 |

|        |   |
|--------|---|
| LNPEP  | 2 |
| LONRF3 | 2 |
| LRCH1  | 2 |
| LRFN1  | 2 |
| LRP4   | 2 |
| LRP8   | 2 |
| LRRC41 | 2 |
| LSAMP  | 2 |
| LTBP1  | 2 |
| LUC7L3 | 2 |
| LYRM2  | 2 |
| LYSMD2 | 2 |
| MAF1   | 2 |
| MAF    | 2 |
| MAFB   | 2 |
| MAP1B  | 2 |
| MAP2K1 | 2 |
| MAP3K9 | 2 |
| MAP4K2 | 2 |
| MARCH2 | 2 |
| MAX    | 2 |
| MBD5   | 2 |
| MCM3AP | 2 |
| MDFIC  | 2 |
| MECP2  | 2 |
| MEIS2  | 2 |
| MGAT5  | 2 |
| MGLL   | 2 |
| MIER3  | 2 |
| MIPOL1 | 2 |
| MLEC   | 2 |
| MLLT6  | 2 |
| MMP15  | 2 |
| MMP19  | 2 |
| MMS19  | 2 |

|         |   |
|---------|---|
| MOCOS   | 2 |
| MOGS    | 2 |
| MOSPD1  | 2 |
| MRAS    | 2 |
| MRPS10  | 2 |
| MRPS25  | 2 |
| MTA2    | 2 |
| MTMR10  | 2 |
| MTMR1   | 2 |
| MTMR12  | 2 |
| MTMR14  | 2 |
| MUM1L1  | 2 |
| MVB12B  | 2 |
| MYRF    | 2 |
| NAA50   | 2 |
| NACC2   | 2 |
| NAP1L1  | 2 |
| NAT14   | 2 |
| NAT8L   | 2 |
| NCEH1   | 2 |
| NCKAP1  | 2 |
| NCKIPSD | 2 |
| NCOR1   | 2 |
| NDP     | 2 |
| NDST1   | 2 |
| NETO1   | 2 |
| NEUROD1 | 2 |
| NFE2L1  | 2 |
| NFIA    | 2 |
| NFIB    | 2 |
| NFIX    | 2 |
| NFYA    | 2 |
| NLK     | 2 |
| NOG     | 2 |
| NOVA2   | 2 |

|         |   |
|---------|---|
| NPEPL1  | 2 |
| NR2C2AP | 2 |
| NR2E1   | 2 |
| NR2F2   | 2 |
| NRAS    | 2 |
| NRD1    | 2 |
| NRK     | 2 |
| NSL1    | 2 |
| NT5C1A  | 2 |
| NUFIP2  | 2 |
| NUP43   | 2 |
| ORMDL1  | 2 |
| OSBPL10 | 2 |
| OSTF1   | 2 |
| OXSRI   | 2 |
| PAG1    | 2 |
| PAPD4   | 2 |
| PAQR9   | 2 |
| PATL1   | 2 |
| PBXIP1  | 2 |
| PCYT1B  | 2 |
| PCYT2   | 2 |
| PDE4B   | 2 |
| PDE5A   | 2 |
| PDE7A   | 2 |
| PDIA3   | 2 |
| PDK4    | 2 |
| PDPK1   | 2 |
| PELI3   | 2 |
| PGM2L1  | 2 |
| PHACTR2 | 2 |
| PHAX    | 2 |
| PHF3    | 2 |
| PHIP    | 2 |
| PI4KA   | 2 |

|          |   |
|----------|---|
| PICALM   | 2 |
| PIGA     | 2 |
| PIGG     | 2 |
| PIK3R3   | 2 |
| PLXNC1   | 2 |
| PNPLA2   | 2 |
| PNPLA6   | 2 |
| PODXL    | 2 |
| POU3F2   | 2 |
| POU4F2   | 2 |
| PPARD    | 2 |
| PPARGC1B | 2 |
| PPM1E    | 2 |
| PPP1CB   | 2 |
| PPP1R12A | 2 |
| PPP1R3B  | 2 |
| PPP1R9B  | 2 |
| PPP2R5E  | 2 |
| PPP6R1   | 2 |
| PRDM15   | 2 |
| PRDM16   | 2 |
| PREX1    | 2 |
| PRICKLE2 | 2 |
| PRKAA1   | 2 |
| PRKAG2   | 2 |
| PRKAR1A  | 2 |
| PRKD1    | 2 |
| PRNP     | 2 |
| PRR15    | 2 |
| PRR5L    | 2 |
| PRRG1    | 2 |
| PTCD3    | 2 |
| PTGES3   | 2 |
| PTPN14   | 2 |
| PTPN5    | 2 |



|               |   |
|---------------|---|
| PTPRA         | 2 |
| PTPRM         | 2 |
| PTPRT         | 2 |
| PVRL1         | 2 |
| PVRL4         | 2 |
| RAB10         | 2 |
| RAB11FIP1     | 2 |
| RAB12         | 2 |
| RAB34         | 2 |
| RAB35         | 2 |
| RALBP1        | 2 |
| RALGAPA2      | 2 |
| RALY          | 2 |
| RAP1B         | 2 |
| RAP2B         | 2 |
| RASAL1        | 2 |
| RASSF8        | 2 |
| RBFOX2        | 2 |
| RCAN2         | 2 |
| RCC2          | 2 |
| RFX3          | 2 |
| RFX7          | 2 |
| RGMA          | 2 |
| RNF219        | 2 |
| RNF44         | 2 |
| ROBO2         | 2 |
| RP11-1055B8.7 | 2 |
| RP1-170O19.20 | 2 |
| RPS6KB1       | 2 |
| RPUSD1        | 2 |
| RSBN1         | 2 |
| RTN4          | 2 |
| RUNX1T1       | 2 |
| SALL4         | 2 |
| SBF2          | 2 |

|           |   |
|-----------|---|
| SCML2     | 2 |
| SCN8A     | 2 |
| SEC22A    | 2 |
| SECISBP2L | 2 |
| SEMA6A    | 2 |
| SERPINE1  | 2 |
| SERTAD2   | 2 |
| SESN2     | 2 |
| SESN3     | 2 |
| SESTD1    | 2 |
| SET       | 2 |
| SFXN2     | 2 |
| SGCB      | 2 |
| SH2B3     | 2 |
| SH3BGRL2  | 2 |
| SH3KBP1   | 2 |
| SHH       | 2 |
| SIX4      | 2 |
| SKIDA1    | 2 |
| SKP1      | 2 |
| SLC10A7   | 2 |
| SLC13A2   | 2 |
| SLC16A6   | 2 |
| SLC24A2   | 2 |
| SLC25A44  | 2 |
| SLC2A1    | 2 |
| SLC2A14   | 2 |
| SLC2A3    | 2 |
| SLC30A9   | 2 |
| SLC43A2   | 2 |
| SLC45A3   | 2 |
| SLC8A1    | 2 |
| SLK       | 2 |
| SMAD9     | 2 |
| SMARCD1   | 2 |

|            |   |
|------------|---|
| SMIM12     | 2 |
| SMPD3      | 2 |
| SMS        | 2 |
| SNAP25     | 2 |
| SNPH       | 2 |
| SNRK       | 2 |
| SNX17      | 2 |
| SNX2       | 2 |
| SNX27      | 2 |
| SNX3       | 2 |
| SOCS3      | 2 |
| SOGA2      | 2 |
| SOX7       | 2 |
| SP1        | 2 |
| SPIN1      | 2 |
| SPIRE1     | 2 |
| SPRYD7     | 2 |
| SREK1      | 2 |
| SRGAP2     | 2 |
| SRSF11     | 2 |
| SSBP3      | 2 |
| SSR1       | 2 |
| ST18       | 2 |
| ST6GALNAC3 | 2 |
| ST8SIA3    | 2 |
| STARD13    | 2 |
| STAT1      | 2 |
| STRADB     | 2 |
| STT3A      | 2 |
| STX11      | 2 |
| STX3       | 2 |
| STX6       | 2 |
| STXBP5     | 2 |
| SUGT1      | 2 |
| SULF1      | 2 |

|          |   |
|----------|---|
| SUZ12    | 2 |
| SYNCRIP  | 2 |
| SYNJ1    | 2 |
| TAF1D    | 2 |
| TAF4B    | 2 |
| TANC1    | 2 |
| TANC2    | 2 |
| TAOK1    | 2 |
| TBC1D5   | 2 |
| TBC1D8   | 2 |
| TBC1D9B  | 2 |
| TBL1XR1  | 2 |
| TEK      | 2 |
| TET2     | 2 |
| TGFA     | 2 |
| TGFB2    | 2 |
| TGFBRAP1 | 2 |
| TIGD5    | 2 |
| TIMM8A   | 2 |
| TMED5    | 2 |
| TMEM11   | 2 |
| TMEM127  | 2 |
| TMEM164  | 2 |
| TMEM52B  | 2 |
| TMEM54   | 2 |
| TMEM63B  | 2 |
| TMEM9B   | 2 |
| TMSB4X   | 2 |
| TMX1     | 2 |
| TNFRSF1B | 2 |
| TOMM70A  | 2 |
| TRAK2    | 2 |
| TRAPPC8  | 2 |
| TRIM23   | 2 |
| TSPAN18  | 2 |

|         |   |
|---------|---|
| TSPAN31 | 2 |
| TSPYL1  | 2 |
| TTC38   | 2 |
| TUBB6   | 2 |
| UBA6    | 2 |
| UBAP2L  | 2 |
| UBE2E2  | 2 |
| UBE2K   | 2 |
| UBE3B   | 2 |
| UBE4B   | 2 |
| UBR1    | 2 |
| UBR5    | 2 |
| UBXN1   | 2 |
| UCP3    | 2 |
| ULK3    | 2 |
| UNC5D   | 2 |
| UNC79   | 2 |
| USP32   | 2 |
| USP33   | 2 |
| USP37   | 2 |
| USP38   | 2 |
| USP4    | 2 |
| USP42   | 2 |
| USP47   | 2 |
| USP48   | 2 |
| USP49   | 2 |
| USP6    | 2 |
| VAV2    | 2 |
| VMP1    | 2 |
| VSIG10  | 2 |
| VSNL1   | 2 |
| WASL    | 2 |
| WDFY2   | 2 |
| WDR20   | 2 |
| WEE1    | 2 |

|         |   |
|---------|---|
| WHSC1   | 2 |
| WNT10B  | 2 |
| XPO4    | 2 |
| YTHDC2  | 2 |
| ZBED4   | 2 |
| ZBTB16  | 2 |
| ZBTB18  | 2 |
| ZBTB34  | 2 |
| ZBTB39  | 2 |
| ZBTB8A  | 2 |
| ZC3H12B | 2 |
| ZDHHC17 | 2 |
| ZDHHC2  | 2 |
| ZDHHC23 | 2 |
| ZEB1    | 2 |
| ZFHX4   | 2 |
| ZFPM2   | 2 |
| ZFYVE26 | 2 |
| ZNF217  | 2 |
| ZNF268  | 2 |
| ZNF274  | 2 |
| ZNF385A | 2 |
| ZNF395  | 2 |
| ZNF652  | 2 |
| ZNF804A | 2 |
| ZNF821  | 2 |
| ZNRF1   | 2 |
| ABCA12  | 1 |
| ABCB9   | 1 |
| ABHD12B | 1 |
| ABHD17B | 1 |
| ABHD5   | 1 |
| ACBD3   | 1 |
| ACOT11  | 1 |
| ACTA2   | 1 |

|                |   |
|----------------|---|
| ACVR1C         | 1 |
| ADAM19         | 1 |
| ADAMTS10       | 1 |
| ADCY3          | 1 |
| ADD2           | 1 |
| ADORA2B        | 1 |
| AFAP1          | 1 |
| AFF1           | 1 |
| AGPAT3         | 1 |
| AGRN           | 1 |
| AK2            | 1 |
| AK4            | 1 |
| AKT2           | 1 |
| AL626787.1     | 1 |
| ALDH1L2        | 1 |
| ALDH4A1        | 1 |
| AMD1           | 1 |
| AMMECR1L       | 1 |
| AP3D1          | 1 |
| AP5M1          | 1 |
| APBA2          | 1 |
| APEX1          | 1 |
| APLNR          | 1 |
| ARHGAP19-SLIT1 | 1 |
| ARHGAP24       | 1 |
| ARHGAP32       | 1 |
| ARHGAP5        | 1 |
| ARHGEF11       | 1 |
| ARHGEF37       | 1 |
| ARID1B         | 1 |
| ARID4A         | 1 |
| ARID4B         | 1 |
| ARMC8          | 1 |
| ARX            | 1 |
| ATAD2B         | 1 |

|           |   |
|-----------|---|
| ATL3      | 1 |
| ATP10B    | 1 |
| ATP11B    | 1 |
| ATP2B1    | 1 |
| ATP5G3    | 1 |
| ATP6V1F   | 1 |
| ATP6V1H   | 1 |
| ATP9A     | 1 |
| ATXN10    | 1 |
| AXIN1     | 1 |
| B3GNT7    | 1 |
| BACE1     | 1 |
| BAG2      | 1 |
| BAG4      | 1 |
| BAHD1     | 1 |
| BAK1      | 1 |
| BCKDHA    | 1 |
| BCL3      | 1 |
| BCLAF1    | 1 |
| BCORL1    | 1 |
| BEND3     | 1 |
| BIRC6     | 1 |
| BLOC1S5   | 1 |
| BMI1      | 1 |
| BMPR2     | 1 |
| BRMS1L    | 1 |
| BRPF3     | 1 |
| BRSK1     | 1 |
| BRSK2     | 1 |
| BTF3L4    | 1 |
| BZW1      | 1 |
| C10orf137 | 1 |
| C10orf53  | 1 |
| C11orf84  | 1 |
| C12orf23  | 1 |

|           |   |
|-----------|---|
| C15orf61  | 1 |
| C17orf70  | 1 |
| C19orf40  | 1 |
| C19orf81  | 1 |
| C1orf52   | 1 |
| C20orf194 | 1 |
| C21orf91  | 1 |
| C3orf14   | 1 |
| C6orf211  | 1 |
| C6orf223  | 1 |
| C7orf41   | 1 |
| C7orf76   | 1 |
| C8orf4    | 1 |
| CA12      | 1 |
| CA5B      | 1 |
| CA7       | 1 |
| CABLES1   | 1 |
| CABP1     | 1 |
| CACNA1A   | 1 |
| CACNA2D3  | 1 |
| CACYBP    | 1 |
| CALN1     | 1 |
| CAMK2G    | 1 |
| CAPN7     | 1 |
| CAPZA1    | 1 |
| CASC10    | 1 |
| CASC3     | 1 |
| CASK      | 1 |
| CASP8     | 1 |
| CBFA2T3   | 1 |
| CBFB      | 1 |
| CCDC120   | 1 |
| CCDC149   | 1 |
| CCDC28B   | 1 |
| CCDC50    | 1 |

|         |   |
|---------|---|
| CCDC88A | 1 |
| CCDC88C | 1 |
| CCDC92  | 1 |
| CCM2    | 1 |
| CCNG1   | 1 |
| CCNJ    | 1 |
| CCNT2   | 1 |
| CCNY    | 1 |
| CCR10   | 1 |
| CCT3    | 1 |
| CD2AP   | 1 |
| CDC37L1 | 1 |
| CDC6    | 1 |
| CDH11   | 1 |
| CDH2    | 1 |
| CDH24   | 1 |
| CDH5    | 1 |
| CDIP1   | 1 |
| CDK12   | 1 |
| CDK18   | 1 |
| CDON    | 1 |
| CDR2L   | 1 |
| CDS2    | 1 |
| CDYL2   | 1 |
| CECR2   | 1 |
| CELSR1  | 1 |
| CENPP   | 1 |
| CEP135  | 1 |
| CEP170  | 1 |
| CEP350  | 1 |
| CEP57   | 1 |
| CHD4    | 1 |
| CHD6    | 1 |
| CHD8    | 1 |
| CHIC1   | 1 |

|             |   |
|-------------|---|
| CHRM2       | 1 |
| CHTF8       | 1 |
| CISD2       | 1 |
| CITED2      | 1 |
| CKAP4       | 1 |
| CLASP1      | 1 |
| CLLU1       | 1 |
| CLP1        | 1 |
| CLPP        | 1 |
| CNKSR3      | 1 |
| CNN3        | 1 |
| CNOT1       | 1 |
| CNTN2       | 1 |
| CNTNAP2     | 1 |
| COL11A2     | 1 |
| COL21A1     | 1 |
| COL26A1     | 1 |
| COL27A1     | 1 |
| COL3A1      | 1 |
| COL4A3BP    | 1 |
| COLCA1      | 1 |
| COLGALT2    | 1 |
| COLQ        | 1 |
| COMMD3-BMI1 | 1 |
| CORO1C      | 1 |
| COX7B       | 1 |
| CPNE2       | 1 |
| CREB1       | 1 |
| CREBRF      | 1 |
| CRK         | 1 |
| CRKL        | 1 |
| CRP         | 1 |
| CRTC1       | 1 |
| CSDC2       | 1 |
| CSE1L       | 1 |

|              |   |
|--------------|---|
| CSNK1D       | 1 |
| CSRNP1       | 1 |
| CSRP2        | 1 |
| CTAGE5       | 1 |
| CTC-435M10.3 | 1 |
| CTH          | 1 |
| CUL4B        | 1 |
| CYP39A1      | 1 |
| DAAM1        | 1 |
| DAB1         | 1 |
| DAB2IP       | 1 |
| DACH1        | 1 |
| DAZAP2       | 1 |
| DCAF17       | 1 |
| DCC          | 1 |
| DCUN1D1      | 1 |
| DCUN1D5      | 1 |
| DCX          | 1 |
| DDB1         | 1 |
| DDHD1        | 1 |
| DDI2         | 1 |
| DGKE         | 1 |
| DGKH         | 1 |
| DGKI         | 1 |
| DHX15        | 1 |
| DIDO1        | 1 |
| DIRAS1       | 1 |
| DIRAS2       | 1 |
| DKK2         | 1 |
| DLGAP3       | 1 |
| DLK1         | 1 |
| DMBX1        | 1 |
| DMD          | 1 |
| DNAJB1       | 1 |
| DNAJC13      | 1 |

|         |   |
|---------|---|
| DNAJC3  | 1 |
| DONSON  | 1 |
| DPY19L3 | 1 |
| DR1     | 1 |
| DROSHA  | 1 |
| DRP2    | 1 |
| DST     | 1 |
| DTNA    | 1 |
| DTX1    | 1 |
| DUSP10  | 1 |
| DUSP13  | 1 |
| DUSP18  | 1 |
| DUSP5   | 1 |
| DUSP9   | 1 |
| DVL2    | 1 |
| E2F6    | 1 |
| EBF3    | 1 |
| EBF4    | 1 |
| ECE1    | 1 |
| EDAR    | 1 |
| EDEM3   | 1 |
| EDIL3   | 1 |
| EEPD1   | 1 |
| EFNA2   | 1 |
| EHD3    | 1 |
| EIF2B3  | 1 |
| EIF2S2  | 1 |
| EIF4G2  | 1 |
| EIF5    | 1 |
| ELF2    | 1 |
| ELFN2   | 1 |
| ELL     | 1 |
| ELL2    | 1 |
| ELMOD1  | 1 |
| ELMSAN1 | 1 |

|          |   |
|----------|---|
| ELOVL3   | 1 |
| ELOVL4   | 1 |
| ELOVL6   | 1 |
| ELP6     | 1 |
| EML1     | 1 |
| EN1      | 1 |
| EN2      | 1 |
| ENOX1    | 1 |
| EPB41    | 1 |
| EPB41L2  | 1 |
| EPB41L4A | 1 |
| EPHA5    | 1 |
| EPHB2    | 1 |
| ERBB4    | 1 |
| ERC2     | 1 |
| ERG      | 1 |
| ERGIC2   | 1 |
| ERMP1    | 1 |
| ERP44    | 1 |
| EVX2     | 1 |
| EXOC5    | 1 |
| EYA1     | 1 |
| FADS1    | 1 |
| FAM102A  | 1 |
| FAM110B  | 1 |
| FAM126A  | 1 |
| FAM126B  | 1 |
| FAM129A  | 1 |
| FAM13A   | 1 |
| FAM155A  | 1 |
| FAM155B  | 1 |
| FAM160B1 | 1 |
| FAM167A  | 1 |
| FAM172A  | 1 |
| FAM175A  | 1 |

|          |   |
|----------|---|
| FAM177A1 | 1 |
| FAM192A  | 1 |
| FAM193B  | 1 |
| FAM222A  | 1 |
| FAM222B  | 1 |
| FAM53C   | 1 |
| FAM63B   | 1 |
| FAM65B   | 1 |
| FAM76A   | 1 |
| FAM83F   | 1 |
| FAXC     | 1 |
| FBLN2    | 1 |
| FBLN5    | 1 |
| FBRS     | 1 |
| FBRSL1   | 1 |
| FBXL20   | 1 |
| FBXL4    | 1 |
| FBXO21   | 1 |
| FBXO30   | 1 |
| FEM1B    | 1 |
| FERMT2   | 1 |
| FGD6     | 1 |
| FGF14    | 1 |
| FKBP14   | 1 |
| FKBP6    | 1 |
| FLJ20373 | 1 |
| FLRT2    | 1 |
| FLRT3    | 1 |
| FNBP1    | 1 |
| FNDC4    | 1 |
| FOSL2    | 1 |
| FOXA1    | 1 |
| FOXB1    | 1 |
| FOXD3    | 1 |
| FOXN3    | 1 |

|        |   |
|--------|---|
| FOXN4  | 1 |
| FOXO4  | 1 |
| FOXP4  | 1 |
| FOXQ1  | 1 |
| FRMD4A | 1 |
| FUBP3  | 1 |
| FURIN  | 1 |
| FXR2   | 1 |
| FYTTD1 | 1 |
| FZD3   | 1 |
| FZD4   | 1 |
| FZD5   | 1 |
| G6PC3  | 1 |
| GABBR2 | 1 |
| GAD1   | 1 |
| GALNT3 | 1 |
| GALNT5 | 1 |
| GALNT7 | 1 |
| GAREM  | 1 |
| GATA2  | 1 |
| GATA6  | 1 |
| GBX2   | 1 |
| GCC1   | 1 |
| GCC2   | 1 |
| GCNT2  | 1 |
| GDF11  | 1 |
| GFI1   | 1 |
| GFPT1  | 1 |
| GFPT2  | 1 |
| GHR    | 1 |
| GIGYF1 | 1 |
| GIPC1  | 1 |
| GJA3   | 1 |
| GJB1   | 1 |
| GLIS3  | 1 |



|           |   |
|-----------|---|
| GLRA2     | 1 |
| GLTP      | 1 |
| GLUD2     | 1 |
| GMEB2     | 1 |
| GMPS      | 1 |
| GNB5      | 1 |
| GNG12     | 1 |
| GNG2      | 1 |
| GNS       | 1 |
| GOLGA6A   | 1 |
| GOLGA6B   | 1 |
| GOLGA6C   | 1 |
| GOLGA6D   | 1 |
| GOLGA6L10 | 1 |
| GOLGA6L4  | 1 |
| GOLGA8A   | 1 |
| GOLM1     | 1 |
| GORASP1   | 1 |
| GOT2      | 1 |
| GPATCH2L  | 1 |
| GPBP1     | 1 |
| GPC4      | 1 |
| GPD2      | 1 |
| GPR125    | 1 |
| GPR126    | 1 |
| GPR133    | 1 |
| GPR135    | 1 |
| GPR174    | 1 |
| GPR183    | 1 |
| GPR61     | 1 |
| GPR63     | 1 |
| GPR75     | 1 |
| GPRIN3    | 1 |
| GRAMD2    | 1 |
| GRB2      | 1 |

|           |   |
|-----------|---|
| GREB1L    | 1 |
| GRHL2     | 1 |
| GRHL3     | 1 |
| GRIA1     | 1 |
| GRM5      | 1 |
| GSK3B     | 1 |
| GSPT2     | 1 |
| GTDC1     | 1 |
| GTF2A2    | 1 |
| GXYLT1    | 1 |
| GYG1      | 1 |
| H3F3B     | 1 |
| H3F3C     | 1 |
| HAND2     | 1 |
| HAO1      | 1 |
| HAPLN1    | 1 |
| HCN4      | 1 |
| HDAC4     | 1 |
| HECTD1    | 1 |
| HEG1      | 1 |
| HGF       | 1 |
| HHIP      | 1 |
| HIAT1     | 1 |
| HIC1      | 1 |
| HIF1A     | 1 |
| HIP1      | 1 |
| HIST1H2BD | 1 |
| HIVEP3    | 1 |
| HLX       | 1 |
| HMG20A    | 1 |
| HMX3      | 1 |
| HNF1B     | 1 |
| HNF4G     | 1 |
| HNRNPA0   | 1 |
| HNRNPF    | 1 |

|         |   |
|---------|---|
| HOMEZ   | 1 |
| HOOK3   | 1 |
| HOXA10  | 1 |
| HOXA13  | 1 |
| HOXA9   | 1 |
| HOXB8   | 1 |
| HOXC6   | 1 |
| HS3ST2  | 1 |
| HSD17B8 | 1 |
| HSPD1   | 1 |
| HTT     | 1 |
| HUNK    | 1 |
| ID3     | 1 |
| ID4     | 1 |
| IFFO2   | 1 |
| IFT122  | 1 |
| IGF1R   | 1 |
| IGJ     | 1 |
| IGLON5  | 1 |
| IGSF3   | 1 |
| IKZF1   | 1 |
| IKZF2   | 1 |
| IKZF5   | 1 |
| ILDR2   | 1 |
| ING5    | 1 |
| INO80D  | 1 |
| INSM1   | 1 |
| INSR    | 1 |
| IPMK    | 1 |
| IPO7    | 1 |
| IRS1    | 1 |
| IRS4    | 1 |
| ISL1    | 1 |
| ITGA2   | 1 |
| ITGA8   | 1 |

|           |   |
|-----------|---|
| ITGB6     | 1 |
| ITPKB     | 1 |
| ITPKC     | 1 |
| ITSN1     | 1 |
| JAG1      | 1 |
| KAT6A     | 1 |
| KBTBD11   | 1 |
| KBTBD8    | 1 |
| KCNA1     | 1 |
| KCNA4     | 1 |
| KCNA6     | 1 |
| KCNAB1    | 1 |
| KCND2     | 1 |
| KCNJ11    | 1 |
| KCNJ13    | 1 |
| KCNJ3     | 1 |
| KCNK12    | 1 |
| KCNMB4    | 1 |
| KCTD16    | 1 |
| KDM3A     | 1 |
| KDM5B     | 1 |
| KHDRBS2   | 1 |
| KIAA0087  | 1 |
| KIAA1033  | 1 |
| KIAA1109  | 1 |
| KIAA1147  | 1 |
| KIAA1199  | 1 |
| KIAA1549L | 1 |
| KIAA1551  | 1 |
| KIF3A     | 1 |
| KIRREL    | 1 |
| KLF3      | 1 |
| KLF7      | 1 |
| KLHDC7A   | 1 |
| KLHDC8A   | 1 |

|         |   |
|---------|---|
| KLHL31  | 1 |
| KPNA3   | 1 |
| KPNA5   | 1 |
| KPNA6   | 1 |
| KPNB1   | 1 |
| KRR1    | 1 |
| LANCL3  | 1 |
| LAPTM4B | 1 |
| LASP1   | 1 |
| LBH     | 1 |
| LCMT2   | 1 |
| LDLRAD3 | 1 |
| LEP     | 1 |
| LHX6    | 1 |
| LIF     | 1 |
| LIFR    | 1 |
| LIMCH1  | 1 |
| LIMK1   | 1 |
| LIMK2   | 1 |
| LIN52   | 1 |
| LIN7A   | 1 |
| LIN7C   | 1 |
| LMBR1L  | 1 |
| LMNB1   | 1 |
| LMX1B   | 1 |
| LONRF1  | 1 |
| LOX     | 1 |
| LPCAT1  | 1 |
| LPHN2   | 1 |
| LPIN2   | 1 |
| LPPR1   | 1 |
| LPPR5   | 1 |
| LRAT    | 1 |
| LRP6    | 1 |
| LRRC4C  | 1 |

|          |   |
|----------|---|
| LRRFIP1  | 1 |
| LSM12    | 1 |
| LYPD3    | 1 |
| LZTS3    | 1 |
| MAGI3    | 1 |
| MAGT1    | 1 |
| MAN2A1   | 1 |
| MAN2A2   | 1 |
| MANEAL   | 1 |
| MAP2     | 1 |
| MAP2K7   | 1 |
| MAP3K3   | 1 |
| MAP4K5   | 1 |
| MAP7D3   | 1 |
| MAPK10   | 1 |
| MAPK14   | 1 |
| MAPK6    | 1 |
| MAPK8IP3 | 1 |
| MAPKAPK3 | 1 |
| MAPRE2   | 1 |
| MARCH5   | 1 |
| MARCH8   | 1 |
| MARCKS   | 1 |
| MATN3    | 1 |
| MATR3    | 1 |
| MBLAC2   | 1 |
| MBNL2    | 1 |
| MBTD1    | 1 |
| MCF2L    | 1 |
| MCM10    | 1 |
| MCTS1    | 1 |
| MDFI     | 1 |
| MDGA1    | 1 |
| MDN1     | 1 |
| MED13    | 1 |

|                |   |
|----------------|---|
| MED13L         | 1 |
| MED14          | 1 |
| MEF2C          | 1 |
| MEGF11         | 1 |
| MEPCE          | 1 |
| MESDC1         | 1 |
| METTTL21A      | 1 |
| MEX3A          | 1 |
| MFAP2          | 1 |
| MFHAS1         | 1 |
| MGAT1          | 1 |
| MGAT4B         | 1 |
| MIA3           | 1 |
| MIB1           | 1 |
| MICALCL        | 1 |
| MICU3          | 1 |
| MID1IP1        | 1 |
| MIEF1          | 1 |
| MIER2          | 1 |
| MINPP1         | 1 |
| MKNK2          | 1 |
| MME            | 1 |
| MN1            | 1 |
| MOSPD3         | 1 |
| MPP6           | 1 |
| MPPED1         | 1 |
| MSANTD3-TMEFF1 | 1 |
| MSI1           | 1 |
| MSL1           | 1 |
| MTDH           | 1 |
| MTMR4          | 1 |
| MUC19          | 1 |
| MXI1           | 1 |
| MYH10          | 1 |
| MYO5A          | 1 |

|         |   |
|---------|---|
| MYOCD   | 1 |
| MYRIP   | 1 |
| MYT1    | 1 |
| N4BP1   | 1 |
| NABP1   | 1 |
| NAIF1   | 1 |
| NAPEPLD | 1 |
| NAV2    | 1 |
| NAV3    | 1 |
| NBEAL1  | 1 |
| NCAN    | 1 |
| NCL     | 1 |
| NCOA7   | 1 |
| NDRG3   | 1 |
| NDUFB9  | 1 |
| NDUFS4  | 1 |
| NEBL    | 1 |
| NEDD4   | 1 |
| NEK2    | 1 |
| NEK6    | 1 |
| NEO1    | 1 |
| NETO2   | 1 |
| NEUROD4 | 1 |
| NEUROD6 | 1 |
| NF1     | 1 |
| NFASC   | 1 |
| NFE2L2  | 1 |
| NGFR    | 1 |
| NGFRAP1 | 1 |
| NIPAL4  | 1 |
| NIPBL   | 1 |
| NKX3-2  | 1 |
| NKX6-1  | 1 |
| NLN     | 1 |
| NMRK1   | 1 |

|         |   |
|---------|---|
| NOP9    | 1 |
| NPAS3   | 1 |
| NPAT    | 1 |
| NPEPPS  | 1 |
| NPTX2   | 1 |
| NPTXR   | 1 |
| NR1D2   | 1 |
| NR2F6   | 1 |
| NR5A2   | 1 |
| NR6A1   | 1 |
| NRBF2   | 1 |
| NREP    | 1 |
| NRIP1   | 1 |
| NRIP2   | 1 |
| NRP2    | 1 |
| NRXN1   | 1 |
| NSUN3   | 1 |
| NTN1    | 1 |
| NUCKS1  | 1 |
| NUDC    | 1 |
| NUDT4   | 1 |
| NUP210  | 1 |
| NUS1    | 1 |
| NXF1    | 1 |
| NXPH1   | 1 |
| NXT2    | 1 |
| OAF     | 1 |
| ONECUT3 | 1 |
| OPA1    | 1 |
| OPCML   | 1 |
| ORC5    | 1 |
| OSER1   | 1 |
| OTP     | 1 |
| OTUD7A  | 1 |
| P2RY2   | 1 |

|          |   |
|----------|---|
| PACS1    | 1 |
| PAFAH1B1 | 1 |
| PAIP2B   | 1 |
| PAK2     | 1 |
| PALM2    | 1 |
| PANK1    | 1 |
| PAPD7    | 1 |
| PAPOLG   | 1 |
| PAPPA    | 1 |
| PAPSS2   | 1 |
| PARD6B   | 1 |
| PAX2     | 1 |
| PAX5     | 1 |
| PAX6     | 1 |
| PAX9     | 1 |
| PCBD1    | 1 |
| PCDH1    | 1 |
| PCDH9    | 1 |
| PCGF3    | 1 |
| PCM1     | 1 |
| PCNX     | 1 |
| PDE10A   | 1 |
| PDE1B    | 1 |
| PDE3A    | 1 |
| PDE3B    | 1 |
| PDE7B    | 1 |
| PDE8B    | 1 |
| PDGFA    | 1 |
| PDGFRA   | 1 |
| PDHB     | 1 |
| PDHX     | 1 |
| PDIA5    | 1 |
| PDK1     | 1 |
| PDK3     | 1 |
| PDLIM2   | 1 |

|         |   |
|---------|---|
| PDLIM4  | 1 |
| PDP2    | 1 |
| PDPN    | 1 |
| PDS5B   | 1 |
| PEAK1   | 1 |
| PEG10   | 1 |
| PELI1   | 1 |
| PELI2   | 1 |
| PER2    | 1 |
| PFKM    | 1 |
| PFN2    | 1 |
| PGAP1   | 1 |
| PGP     | 1 |
| PHB     | 1 |
| PHC2    | 1 |
| PHF15   | 1 |
| PHF21A  | 1 |
| PHGDH   | 1 |
| PHKA1   | 1 |
| PHLDA1  | 1 |
| PHLPP2  | 1 |
| PIK3R1  | 1 |
| PIP4K2B | 1 |
| PITHD1  | 1 |
| PKIA    | 1 |
| PKIB    | 1 |
| PLAG1   | 1 |
| PLAGL1  | 1 |
| PLAGL2  | 1 |
| PLCE1   | 1 |
| PLCL2   | 1 |
| PLCXD3  | 1 |
| PLD5    | 1 |
| PLEKHH1 | 1 |
| PLEKHH2 | 1 |

|            |   |
|------------|---|
| PLEKHM1    | 1 |
| PLXND1     | 1 |
| PMEPA1     | 1 |
| PMF1-BGLAP | 1 |
| PNISR      | 1 |
| POFUT1     | 1 |
| POGLUT1    | 1 |
| POGZ       | 1 |
| POM121C    | 1 |
| POTEG      | 1 |
| POTEM      | 1 |
| POU2F1     | 1 |
| POU2F3     | 1 |
| POU3F3     | 1 |
| PPARG      | 1 |
| PPAT       | 1 |
| PPFIBP1    | 1 |
| PPIF       | 1 |
| PPIG       | 1 |
| PPME1      | 1 |
| PPP1CC     | 1 |
| PPP2R2C    | 1 |
| PPP3R1     | 1 |
| PPP4C      | 1 |
| PPP4R1L    | 1 |
| PPP4R2     | 1 |
| PPTC7      | 1 |
| PRCP       | 1 |
| PRELID2    | 1 |
| PRICKLE1   | 1 |
| PRKX       | 1 |
| PRMT8      | 1 |
| PRPF19     | 1 |
| PRR12      | 1 |
| PRSS53     | 1 |

|              |   |
|--------------|---|
| PSMC6        | 1 |
| PSME3        | 1 |
| PTBP2        | 1 |
| PTCHD1       | 1 |
| PTCHD3       | 1 |
| PTCHD4       | 1 |
| PTGDR        | 1 |
| PTGER3       | 1 |
| PTGFRN       | 1 |
| PTGIS        | 1 |
| PTPN12       | 1 |
| PTPN4        | 1 |
| PTPN9        | 1 |
| PTPRB        | 1 |
| PTRH2        | 1 |
| PURA         | 1 |
| PXN          | 1 |
| RAB11FIP3    | 1 |
| RAB13        | 1 |
| RAB15        | 1 |
| RAB20        | 1 |
| RAB27A       | 1 |
| RAB33B       | 1 |
| RAB38        | 1 |
| RAB3B        | 1 |
| RAB4A        | 1 |
| RAB6B        | 1 |
| RAD51D       | 1 |
| RAD51L3-RFFL | 1 |
| RAD54L2      | 1 |
| RALGAPB      | 1 |
| RALGPS1      | 1 |
| RAPGEF2      | 1 |
| RASA2        | 1 |
| RASD2        | 1 |

|               |   |
|---------------|---|
| RASGEF1B      | 1 |
| RBBP4         | 1 |
| RBM15B        | 1 |
| RBP2          | 1 |
| RBPM2         | 1 |
| RBX1          | 1 |
| RCOR3         | 1 |
| REEP2         | 1 |
| RELN          | 1 |
| REPS1         | 1 |
| RERE          | 1 |
| RET           | 1 |
| REV3L         | 1 |
| RFFL          | 1 |
| RGL2          | 1 |
| RGPD4         | 1 |
| RGPD6         | 1 |
| RGS17         | 1 |
| RGS6          | 1 |
| RHEB          | 1 |
| RIMS3         | 1 |
| RND3          | 1 |
| RNF11         | 1 |
| RNF141        | 1 |
| RNF144A       | 1 |
| RNF146        | 1 |
| RNF182        | 1 |
| RNGTT         | 1 |
| ROCK2         | 1 |
| ROR1          | 1 |
| RP11-122A3.2  | 1 |
| RP11-192H23.4 | 1 |
| RP11-407N17.3 | 1 |
| RP13-996F3.4  | 1 |
| RP13-996F3.5  | 1 |

|                |   |
|----------------|---|
| RPGRIP1L       | 1 |
| RPL36A-HNRNPH2 | 1 |
| RPN1           | 1 |
| RPRD1B         | 1 |
| RRAS           | 1 |
| RREB1          | 1 |
| RSPO3          | 1 |
| RUFY3          | 1 |
| RUNX1          | 1 |
| RUNX3          | 1 |
| SALL1          | 1 |
| SAMD10         | 1 |
| SAMD12         | 1 |
| SAMD4A         | 1 |
| SAMD9L         | 1 |
| SAR1A          | 1 |
| SASH1          | 1 |
| SATB2          | 1 |
| SAYSD1         | 1 |
| SCAI           | 1 |
| SCAMP1         | 1 |
| SCAMP3         | 1 |
| SCD            | 1 |
| SCN1A          | 1 |
| SCN3B          | 1 |
| SCYL3          | 1 |
| SDAD1          | 1 |
| SDC4           | 1 |
| SEC24A         | 1 |
| SEC61A1        | 1 |
| SEMA6D         | 1 |
| SEMA7A         | 1 |
| SEPHS1         | 1 |
| SEPT11         | 1 |
| SETD5          | 1 |

|          |   |
|----------|---|
| SETD7    | 1 |
| SETD8    | 1 |
| SFMBT2   | 1 |
| SFPQ     | 1 |
| SFRP1    | 1 |
| SGCE     | 1 |
| SGPP1    | 1 |
| SH2D3C   | 1 |
| SH3RF1   | 1 |
| SHC3     | 1 |
| SHE      | 1 |
| SHISA6   | 1 |
| SHOC2    | 1 |
| SIK2     | 1 |
| SIPA1L3  | 1 |
| SIRT1    | 1 |
| SIX1     | 1 |
| SIX5     | 1 |
| SKOR1    | 1 |
| SLC12A6  | 1 |
| SLC16A10 | 1 |
| SLC16A1  | 1 |
| SLC1A3   | 1 |
| SLC22A23 | 1 |
| SLC25A16 | 1 |
| SLC25A25 | 1 |
| SLC26A11 | 1 |
| SLC29A4  | 1 |
| SLC30A10 | 1 |
| SLC30A1  | 1 |
| SLC30A7  | 1 |
| SLC30A8  | 1 |
| SLC35F3  | 1 |
| SLC38A4  | 1 |
| SLC39A10 | 1 |



|          |   |
|----------|---|
| SLC39A11 | 1 |
| SLC39A13 | 1 |
| SLC40A1  | 1 |
| SLC44A1  | 1 |
| SLC6A6   | 1 |
| SLC7A14  | 1 |
| SLC9A7   | 1 |
| SLCO3A1  | 1 |
| SLIT1    | 1 |
| SLIT2    | 1 |
| SLTM     | 1 |
| SMAP1    | 1 |
| SMARCA2  | 1 |
| SMG1     | 1 |
| SMIM14   | 1 |
| SMURF1   | 1 |
| SNAI1    | 1 |
| SNX1     | 1 |
| SNX12    | 1 |
| SNX18    | 1 |
| SNX22    | 1 |
| SNX29    | 1 |
| SOCS2    | 1 |
| SOCS6    | 1 |
| SOWAHA   | 1 |
| SOX17    | 1 |
| SOX6     | 1 |
| SP2      | 1 |
| SP3      | 1 |
| SP4      | 1 |
| SPATA2   | 1 |
| SPCS2    | 1 |
| SPG21    | 1 |
| SPOPL    | 1 |
| SPPL3    | 1 |

|         |   |
|---------|---|
| SPRY2   | 1 |
| SPTBN1  | 1 |
| SPTLC2  | 1 |
| SRCIN1  | 1 |
| SRGAP1  | 1 |
| SRI     | 1 |
| SRL     | 1 |
| SRM     | 1 |
| SRP72   | 1 |
| SRRD    | 1 |
| SRSF1   | 1 |
| SRSF9   | 1 |
| SS18L1  | 1 |
| ST8SIA4 | 1 |
| STAB2   | 1 |
| STAC    | 1 |
| STAG1   | 1 |
| STAT5B  | 1 |
| STEAP3  | 1 |
| STIM2   | 1 |
| STK24   | 1 |
| STK32B  | 1 |
| STK35   | 1 |
| STK39   | 1 |
| STK40   | 1 |
| STMN1   | 1 |
| STRN4   | 1 |
| STX16   | 1 |
| SUCO    | 1 |
| SUFU    | 1 |
| SUMO2   | 1 |
| SURF4   | 1 |
| SV2A    | 1 |
| SYDE1   | 1 |
| SYNDIG1 | 1 |

|          |   |
|----------|---|
| SYNRG    | 1 |
| SYTL3    | 1 |
| SYVN1    | 1 |
| TACC1    | 1 |
| TAF3     | 1 |
| TAL1     | 1 |
| TAS2R5   | 1 |
| TBC1D13  | 1 |
| TBC1D22B | 1 |
| TBC1D25  | 1 |
| TBC1D30  | 1 |
| TBC1D4   | 1 |
| TCEANC2  | 1 |
| TCF7L2   | 1 |
| TEFM     | 1 |
| TET1     | 1 |
| TEX2     | 1 |
| TFEB     | 1 |
| TGFBR1   | 1 |
| TGFBR2   | 1 |
| TGFBR3   | 1 |
| TGIF1    | 1 |
| TGOLN2   | 1 |
| THAP1    | 1 |
| THAP11   | 1 |
| THAP2    | 1 |
| THBS1    | 1 |
| THOC1    | 1 |
| THRB     | 1 |
| TIAL1    | 1 |
| TJAP1    | 1 |
| TLK2     | 1 |
| TLL1     | 1 |
| TLN2     | 1 |
| TLX1     | 1 |

|                |   |
|----------------|---|
| TMBIM6         | 1 |
| TMCC1          | 1 |
| TMED2          | 1 |
| TMED8          | 1 |
| TMED9          | 1 |
| TMEFF1         | 1 |
| TMEM110        | 1 |
| TMEM120B       | 1 |
| TMEM123        | 1 |
| TMEM132E       | 1 |
| TMEM151B       | 1 |
| TMEM167A       | 1 |
| TMEM170B       | 1 |
| TMEM178B       | 1 |
| TMEM189        | 1 |
| TMEM189-UBE2V1 | 1 |
| TMEM194B       | 1 |
| TMEM200C       | 1 |
| TMEM229A       | 1 |
| TMEM248        | 1 |
| TMEM25         | 1 |
| TMEM260        | 1 |
| TMEM26         | 1 |
| TMEM43         | 1 |
| TMEM64         | 1 |
| TMEM65         | 1 |
| TMEM87A        | 1 |
| TMEM91         | 1 |
| TMTC2          | 1 |
| TNIK           | 1 |
| TNR            | 1 |
| TNRC18         | 1 |
| TOX4           | 1 |
| TPD52L2        | 1 |
| TRABD          | 1 |

|          |   |
|----------|---|
| TRAF3    | 1 |
| TRAF3IP2 | 1 |
| TRAF6    | 1 |
| TRAPPC6B | 1 |
| TRERF1   | 1 |
| TRHDE    | 1 |
| TRIM44   | 1 |
| TRIM67   | 1 |
| TRIP4    | 1 |
| TRMT2A   | 1 |
| TROVE2   | 1 |
| TSC1     | 1 |
| TSC22D2  | 1 |
| TSPAN14  | 1 |
| TSPAN7   | 1 |
| TSTD2    | 1 |
| TTC28    | 1 |
| TTC39A   | 1 |
| TTC7B    | 1 |
| TTC9     | 1 |
| TTF2     | 1 |
| TTL7     | 1 |
| TUB      | 1 |
| TXNDC5   | 1 |
| TYW1     | 1 |
| UAP1     | 1 |
| UBA2     | 1 |
| UBE2E3   | 1 |
| UBE2F    | 1 |
| UBE2N    | 1 |
| UBE2NL   | 1 |
| UBE2V1   | 1 |
| UBE2V2   | 1 |
| UBXN7    | 1 |
| ULK1     | 1 |

|        |   |
|--------|---|
| UNC13B | 1 |
| UNC13C | 1 |
| UNC80  | 1 |
| UNKL   | 1 |
| UPF1   | 1 |
| URGCP  | 1 |
| USP46  | 1 |
| UST    | 1 |
| VANGL2 | 1 |
| VAPA   | 1 |
| VAT1L  | 1 |
| VAV3   | 1 |
| VCAN   | 1 |
| VCL    | 1 |
| VEGFC  | 1 |
| VGLL3  | 1 |
| VPS4B  | 1 |
| VWC2L  | 1 |
| VWDE   | 1 |
| WBP1L  | 1 |
| WDR37  | 1 |
| WDR7   | 1 |
| WDTC1  | 1 |
| WIPF2  | 1 |
| WISP1  | 1 |
| WNK1   | 1 |
| WNK3   | 1 |
| WNT3A  | 1 |
| WSB1   | 1 |
| XCR1   | 1 |
| XPR1   | 1 |
| YAP1   | 1 |
| YPEL2  | 1 |
| ZBTB10 | 1 |
| ZBTB14 | 1 |

|         |   |
|---------|---|
| ZBTB3   | 1 |
| ZBTB42  | 1 |
| ZC3H12D | 1 |
| ZCCHC24 | 1 |
| ZFAND5  | 1 |
| ZFP36L1 | 1 |
| ZFP36L2 | 1 |
| ZFYVE9  | 1 |
| ZHX1    | 1 |
| ZIC1    | 1 |
| ZKSCAN2 | 1 |
| ZMAT3   | 1 |
| ZMYM4   | 1 |
| ZNF185  | 1 |
| ZNF202  | 1 |
| ZNF24   | 1 |
| ZNF280C | 1 |
| ZNF385D | 1 |
| ZNF462  | 1 |
| ZNF488  | 1 |
| ZNF516  | 1 |
| ZNF532  | 1 |
| ZNF608  | 1 |
| ZNF638  | 1 |
| ZNF800  | 1 |
| ZNF827  | 1 |
| ZZZ3    | 1 |

Supplementary Table 4. Predicted target genes of miRNAs downregulated by RSV from Table 2 and 3.

| Target Gene | miRNAs |
|-------------|--------|
| PAX2        | 5      |
| DYNLL2      | 4      |
| KLF7        | 4      |
| AAK1        | 3      |
| BSN         | 3      |
| CADM1       | 3      |
| CALCOCO1    | 3      |
| DPF2        | 3      |
| FIGN        | 3      |
| FOSL2       | 3      |
| GPR61       | 3      |
| LCOR        | 3      |
| LPHN1       | 3      |
| LRRC15      | 3      |
| MED1        | 3      |
| NFIX        | 3      |
| NOX5        | 3      |
| PDE7A       | 3      |
| PRX         | 3      |
| ST5         | 3      |
| THRA        | 3      |
| TRAF6       | 3      |
| WWC2        | 3      |
| ACKR2       | 2      |
| AGO1        | 2      |
| ANKFY1      | 2      |
| ATG7        | 2      |
| ATP1A3      | 2      |
| BCL2L2      | 2      |
| BEND3       | 2      |

|          |   |
|----------|---|
| CADM2    | 2 |
| CBX5     | 2 |
| CDKN2AIP | 2 |
| CECR6    | 2 |
| CREB1    | 2 |
| CSMD1    | 2 |
| CSRNP3   | 2 |
| DLGAP2   | 2 |
| DNAH10OS | 2 |
| DNAJB2   | 2 |
| ELAVL3   | 2 |
| EPHA8    | 2 |
| FAM76A   | 2 |
| FBXO28   | 2 |
| GATA6    | 2 |
| GPR75    | 2 |
| HIC2     | 2 |
| HTT      | 2 |
| IGF2R    | 2 |
| IGSF1    | 2 |
| IKZF3    | 2 |
| IKZF4    | 2 |
| IRAK1    | 2 |
| KCND3    | 2 |
| KIAA0141 | 2 |
| KIAA0247 | 2 |
| KLHDC10  | 2 |
| KLHL29   | 2 |
| KPNA5    | 2 |
| LRRC8B   | 2 |
| MDGA2    | 2 |

|         |   |
|---------|---|
| MDM4    | 2 |
| MEX3A   | 2 |
| MIEF1   | 2 |
| MSI1    | 2 |
| MTSS1L  | 2 |
| MYBL1   | 2 |
| MYO5A   | 2 |
| NMNAT2  | 2 |
| NOVA1   | 2 |
| NR6A1   | 2 |
| PBX2    | 2 |
| PCDH10  | 2 |
| PCDH1   | 2 |
| POLR3H  | 2 |
| PRKAA2  | 2 |
| PTPRA   | 2 |
| RIMS2   | 2 |
| RORA    | 2 |
| RORB    | 2 |
| SETD9   | 2 |
| SHANK3  | 2 |
| SMTNL2  | 2 |
| SNX22   | 2 |
| SOBP    | 2 |
| STRN    | 2 |
| TANC2   | 2 |
| TBC1D20 | 2 |
| USP3    | 2 |
| VPS52   | 2 |
| VWC2L   | 2 |
| XYL1    | 2 |
| ZBTB16  | 2 |
| ZNF280C | 2 |

|                |   |
|----------------|---|
| ZNF367         | 2 |
| ZNRF3          | 2 |
| ABCA9          | 1 |
| ABCC1          | 1 |
| ABCG1          | 1 |
| ABCG4          | 1 |
| ABHD15         | 1 |
| ABL2           | 1 |
| AC012215.1     | 1 |
| AC138655.1     | 1 |
| ACER3          | 1 |
| ACTG1          | 1 |
| ACTN4          | 1 |
| ADAM19         | 1 |
| AFAP1L2        | 1 |
| AFF4           | 1 |
| AGO3           | 1 |
| AGPAT3         | 1 |
| AGPAT6         | 1 |
| AHSA2          | 1 |
| AKAP2          | 1 |
| ALPL           | 1 |
| AMIGO2         | 1 |
| AMN            | 1 |
| ANK1           | 1 |
| ANK3           | 1 |
| ANKRD12        | 1 |
| ANKRD34A       | 1 |
| ANXA7          | 1 |
| APP            | 1 |
| APPL1          | 1 |
| AQPEP          | 1 |
| ARHGAP19-SLIT1 | 1 |

|              |   |
|--------------|---|
| ARHGEF12     | 1 |
| ARIH2        | 1 |
| ARMC8        | 1 |
| ARNT         | 1 |
| ARRDC3       | 1 |
| ARSJ         | 1 |
| ASB16        | 1 |
| ASIC1        | 1 |
| ATCAY        | 1 |
| ATF2         | 1 |
| ATP5J2-PTCD1 | 1 |
| ATP6V1F      | 1 |
| ATP8B1       | 1 |
| ATXN2        | 1 |
| ATXN7        | 1 |
| BACH2        | 1 |
| BAG1         | 1 |
| BAI1         | 1 |
| BAZ1B        | 1 |
| BAZ2A        | 1 |
| BAZ2B        | 1 |
| BBX          | 1 |
| BCL2L11      | 1 |
| BCL2L14      | 1 |
| BCL6         | 1 |
| BCORL1       | 1 |
| BCR          | 1 |
| BDNF         | 1 |
| BEND4        | 1 |
| BICD1        | 1 |
| BICD2        | 1 |
| BLZF1        | 1 |
| BMF          | 1 |

|          |   |
|----------|---|
| BMP2K    | 1 |
| BMPR1A   | 1 |
| BNC1     | 1 |
| BRD4     | 1 |
| BTG2     | 1 |
| BTRC     | 1 |
| C10orf76 | 1 |
| C14orf28 | 1 |
| C16orf52 | 1 |
| C16orf72 | 1 |
| C16orf89 | 1 |
| C17orf75 | 1 |
| C17orf78 | 1 |
| C21orf33 | 1 |
| C2CD2L   | 1 |
| C3orf14  | 1 |
| C4orf3   | 1 |
| C5AR2    | 1 |
| CA10     | 1 |
| CABP4    | 1 |
| CADM4    | 1 |
| CALCR    | 1 |
| CALN1    | 1 |
| CAMK1G   | 1 |
| CAMK2B   | 1 |
| CAMK2D   | 1 |
| CAMK2G   | 1 |
| CAMSAP1  | 1 |
| CAPZA1   | 1 |
| CAPZB    | 1 |
| CARD10   | 1 |
| CASD1    | 1 |
| CASK     | 1 |

|          |   |
|----------|---|
| CCDC6    | 1 |
| CCDC71L  | 1 |
| CCDC88A  | 1 |
| CCDC9    | 1 |
| CCND2    | 1 |
| CCNJ     | 1 |
| CCNK     | 1 |
| CD3D     | 1 |
| CD80     | 1 |
| CDC14A   | 1 |
| CDC42    | 1 |
| CDC42EP3 | 1 |
| CDC6     | 1 |
| CDH24    | 1 |
| CDH4     | 1 |
| CDK6     | 1 |
| CDON     | 1 |
| CDS1     | 1 |
| CELF1    | 1 |
| CELF3    | 1 |
| CELF6    | 1 |
| CEP350   | 1 |
| CEP85L   | 1 |
| CHD6     | 1 |
| CHL1     | 1 |
| CHST11   | 1 |
| CLASP2   | 1 |
| CLCN5    | 1 |
| CLCN6    | 1 |
| CLDN18   | 1 |
| CNKSR3   | 1 |
| CNNM3    | 1 |
| CNNM4    | 1 |

|               |   |
|---------------|---|
| CNOT6         | 1 |
| CNTD1         | 1 |
| CNTFR         | 1 |
| CNTN2         | 1 |
| CNTNAP5       | 1 |
| CORO2B        | 1 |
| CPNE2         | 1 |
| CRB3          | 1 |
| CREBRF        | 1 |
| CRK           | 1 |
| CRLF3         | 1 |
| CRNKL1        | 1 |
| CSMD2         | 1 |
| CSNK1D        | 1 |
| CTA-299D3.8   | 1 |
| CTD-2267D19.3 | 1 |
| CTDSPL        | 1 |
| CTDSPL2       | 1 |
| CTNNBIP1      | 1 |
| CTSE          | 1 |
| CTSK          | 1 |
| CXorf36       | 1 |
| CYB561        | 1 |
| CYP20A1       | 1 |
| CYP4V2        | 1 |
| CYTH1         | 1 |
| DAB2IP        | 1 |
| DAZAP1        | 1 |
| DCAF12        | 1 |
| DCLRE1C       | 1 |
| DCTN3         | 1 |
| DDHD1         | 1 |
| DGCR14        | 1 |



|            |   |
|------------|---|
| DGKB       | 1 |
| DGKG       | 1 |
| DGKH       | 1 |
| DGKI       | 1 |
| DHDDS      | 1 |
| DLEC1      | 1 |
| DLG2       | 1 |
| DLG5       | 1 |
| DLGAP3     | 1 |
| DNAH17     | 1 |
| DNAH17-AS1 | 1 |
| DNAJB14    | 1 |
| DNAJC14    | 1 |
| DNAL1      | 1 |
| DNM1       | 1 |
| DNPEP      | 1 |
| DOCK11     | 1 |
| DRP2       | 1 |
| DTX3L      | 1 |
| DUSP16     | 1 |
| DVL3       | 1 |
| DYRK1B     | 1 |
| E2F3       | 1 |
| E2F6       | 1 |
| E2F7       | 1 |
| EBF2       | 1 |
| EDNRB      | 1 |
| EHF        | 1 |
| EIF4B      | 1 |
| EIF4G2     | 1 |
| EIF5A      | 1 |
| EIF5A2     | 1 |
| ELAVL2     | 1 |

|          |   |
|----------|---|
| ELK1     | 1 |
| ELOVL2   | 1 |
| ELOVL4   | 1 |
| ELOVL6   | 1 |
| ELP4     | 1 |
| EMC10    | 1 |
| ENAH     | 1 |
| EPHA2    | 1 |
| EPHA4    | 1 |
| EPHA5    | 1 |
| EPHB2    | 1 |
| ERBB2    | 1 |
| ERBB4    | 1 |
| ERGIC2   | 1 |
| ERI2     | 1 |
| ERI3     | 1 |
| ERLEC1   | 1 |
| ESRRG    | 1 |
| ESYT2    | 1 |
| EVI5     | 1 |
| F9       | 1 |
| FADS3    | 1 |
| FAIM2    | 1 |
| FAM101A  | 1 |
| FAM114A1 | 1 |
| FAM134C  | 1 |
| FAM168A  | 1 |
| FAM169A  | 1 |
| FAM196A  | 1 |
| FAM208A  | 1 |
| FAM210A  | 1 |
| FAM222A  | 1 |
| FAM26E   | 1 |

|          |   |
|----------|---|
| FAM53B   | 1 |
| FAM53C   | 1 |
| FAM65B   | 1 |
| FAM83F   | 1 |
| FAXC     | 1 |
| FBXL20   | 1 |
| FBXO30   | 1 |
| FBXW2    | 1 |
| FKBP15   | 1 |
| FLJ20373 | 1 |
| FLOT2    | 1 |
| FLRT2    | 1 |
| FLT1     | 1 |
| FMO2     | 1 |
| FNBP1L   | 1 |
| FNDC5    | 1 |
| FRK      | 1 |
| FRS2     | 1 |
| FRYL     | 1 |
| FSTL4    | 1 |
| FXR2     | 1 |
| FZD1     | 1 |
| FZD2     | 1 |
| GABPA    | 1 |
| GABRB1   | 1 |
| GABRB2   | 1 |
| GALM     | 1 |
| GALNT10  | 1 |
| GALNT1   | 1 |
| GALNT8   | 1 |
| GATA3    | 1 |
| GATAD2A  | 1 |
| GATAD2B  | 1 |

|         |   |
|---------|---|
| GATSL2  | 1 |
| GCLM    | 1 |
| GDNF    | 1 |
| GGA2    | 1 |
| GINM1   | 1 |
| GINS2   | 1 |
| GJA9    | 1 |
| GLYATL3 | 1 |
| GMPS    | 1 |
| GNA13   | 1 |
| GNL1    | 1 |
| GOLGA3  | 1 |
| GOSR1   | 1 |
| GPBP1   | 1 |
| GPCPD1  | 1 |
| GPR107  | 1 |
| GPR12   | 1 |
| GPR156  | 1 |
| GPR26   | 1 |
| GPR37L1 | 1 |
| GPRIN3  | 1 |
| GPX8    | 1 |
| GRID1   | 1 |
| GRK5    | 1 |
| GRSF1   | 1 |
| GTF2H1  | 1 |
| GTPBP1  | 1 |
| H3F3B   | 1 |
| H3F3C   | 1 |
| HAS3    | 1 |
| HAUS3   | 1 |
| HCN1    | 1 |
| HDAC4   | 1 |

|          |   |
|----------|---|
| HEYL     | 1 |
| HIF3A    | 1 |
| HIPK3    | 1 |
| HNRNPA0  | 1 |
| HNRNPD   | 1 |
| HNRNPK   | 1 |
| HOMEZ    | 1 |
| HOOK3    | 1 |
| HOXA1    | 1 |
| HOXA13   | 1 |
| HOXA3    | 1 |
| HOXB3    | 1 |
| HOXB6    | 1 |
| HOXD10   | 1 |
| HP1BP3   | 1 |
| HSD17B8  | 1 |
| HSPA4L   | 1 |
| HSPH1    | 1 |
| IFFO2    | 1 |
| IFRG15   | 1 |
| IGDCC4   | 1 |
| IGJ      | 1 |
| IL1RAPL1 | 1 |
| IMPA2    | 1 |
| INHBB    | 1 |
| INO80D   | 1 |
| INPP5K   | 1 |
| IRS1     | 1 |
| IST1     | 1 |
| ITGB8    | 1 |
| ITSN1    | 1 |
| JARID2   | 1 |
| JAZF1    | 1 |

|          |   |
|----------|---|
| JOSD1    | 1 |
| KAT6B    | 1 |
| KAT7     | 1 |
| KBTBD4   | 1 |
| KCMF1    | 1 |
| KCNA6    | 1 |
| KCNAB3   | 1 |
| KCNC3    | 1 |
| KCNH5    | 1 |
| KCNJ6    | 1 |
| KCNK10   | 1 |
| KCNN3    | 1 |
| KCTD15   | 1 |
| KCTD16   | 1 |
| KCTD17   | 1 |
| KDM2A    | 1 |
| KDM2B    | 1 |
| KIAA1024 | 1 |
| KIAA1199 | 1 |
| KIAA1429 | 1 |
| KIAA1462 | 1 |
| KIAA1549 | 1 |
| KIF1B    | 1 |
| KIF24    | 1 |
| KIF26B   | 1 |
| KIF3C    | 1 |
| KLC1     | 1 |
| KLC2     | 1 |
| KLF11    | 1 |
| KLHL3    | 1 |
| KLK5     | 1 |
| KMT2D    | 1 |
| KPNA6    | 1 |

|         |   |
|---------|---|
| KPNB1   | 1 |
| L3MBTL3 | 1 |
| LANCL1  | 1 |
| LAYN    | 1 |
| LCP2    | 1 |
| LEPRE1  | 1 |
| LFNG    | 1 |
| LGALSL  | 1 |
| LHFPL4  | 1 |
| LIF     | 1 |
| LIN28A  | 1 |
| LIX1L   | 1 |
| LPCAT3  | 1 |
| LRCH3   | 1 |
| LRRC16B | 1 |
| LRRC8E  | 1 |
| LRRFIP1 | 1 |
| LSAMP   | 1 |
| LSM11   | 1 |
| LTB     | 1 |
| LYVE1   | 1 |
| LZIC    | 1 |
| MAN1C1  | 1 |
| MANEAL  | 1 |
| MAP3K13 | 1 |
| MAP3K2  | 1 |
| MAP3K7  | 1 |
| MAPK14  | 1 |
| MAPKBP1 | 1 |
| MAPRE1  | 1 |
| MAPRE2  | 1 |
| MAPT    | 1 |
| MARCH6  | 1 |

|        |   |
|--------|---|
| MARK1  | 1 |
| MAT2A  | 1 |
| MBD5   | 1 |
| MCMBP  | 1 |
| MESDC1 | 1 |
| MFHAS1 | 1 |
| MID2   | 1 |
| MLLT3  | 1 |
| MLLT6  | 1 |
| MMP16  | 1 |
| MORN4  | 1 |
| MRRF   | 1 |
| MTDH   | 1 |
| MTF1   | 1 |
| MTF2   | 1 |
| MTMR3  | 1 |
| MTMR9  | 1 |
| MYCBP  | 1 |
| MYLK   | 1 |
| MYLK3  | 1 |
| MYO18A | 1 |
| MYO6   | 1 |
| MYPN   | 1 |
| MYT1   | 1 |
| MYT1L  | 1 |
| NACC1  | 1 |
| NAGS   | 1 |
| NAIF1  | 1 |
| NAV1   | 1 |
| NCOA2  | 1 |
| NCOA6  | 1 |
| NCOR2  | 1 |
| NDST1  | 1 |

|         |   |
|---------|---|
| NEDD4   | 1 |
| NF2     | 1 |
| NFASC   | 1 |
| NFAT5   | 1 |
| NFATC2  | 1 |
| NFATC3  | 1 |
| NFE2L1  | 1 |
| NLRP1   | 1 |
| NONO    | 1 |
| NPAS3   | 1 |
| NPAS4   | 1 |
| NR1D1   | 1 |
| NR2C2   | 1 |
| NR4A3   | 1 |
| NR5A2   | 1 |
| NRAS    | 1 |
| NRP2    | 1 |
| NRSN1   | 1 |
| NSD1    | 1 |
| NT5C1A  | 1 |
| NT5DC1  | 1 |
| NTPCR   | 1 |
| NUCKS1  | 1 |
| NUDT17  | 1 |
| NUFIP2  | 1 |
| NUMB    | 1 |
| NUP37   | 1 |
| NUP50   | 1 |
| ONECUT1 | 1 |
| ONECUT2 | 1 |
| OSBP2   | 1 |
| OSTN    | 1 |
| OTOP3   | 1 |

|             |   |
|-------------|---|
| OTUD7A      | 1 |
| PADI2       | 1 |
| PAK6        | 1 |
| PAK7        | 1 |
| PALM2       | 1 |
| PALM2-AKAP2 | 1 |
| PAPD5       | 1 |
| PAPOLA      | 1 |
| PARPBP      | 1 |
| PARS2       | 1 |
| PAX5        | 1 |
| PAX7        | 1 |
| PAX8        | 1 |
| PBX1        | 1 |
| PCDHA10     | 1 |
| PCDHA1      | 1 |
| PCDHA11     | 1 |
| PCDHA12     | 1 |
| PCDHA13     | 1 |
| PCDHA2      | 1 |
| PCDHA3      | 1 |
| PCDHA4      | 1 |
| PCDHA5      | 1 |
| PCDHA6      | 1 |
| PCDHA7      | 1 |
| PCDHA8      | 1 |
| PCDHA9      | 1 |
| PCDHAC1     | 1 |
| PCDHAC2     | 1 |
| PCP4L1      | 1 |
| PDE12       | 1 |
| PDE4A       | 1 |
| PDF         | 1 |

|          |   |
|----------|---|
| PDHB     | 1 |
| PDZD8    | 1 |
| PEA15    | 1 |
| PER1     | 1 |
| PEX5L    | 1 |
| PGK1     | 1 |
| PHF7     | 1 |
| PHLDB1   | 1 |
| PHLPP2   | 1 |
| PHOX2B   | 1 |
| PHYHIP   | 1 |
| PIK3CA   | 1 |
| PIK3CB   | 1 |
| PILRA    | 1 |
| PIP5K1B  | 1 |
| PITPNA   | 1 |
| PKIA     | 1 |
| PLA2G2F  | 1 |
| PLAC8    | 1 |
| PLEKHA1  | 1 |
| PLEKHG3  | 1 |
| PM20D2   | 1 |
| PNKP     | 1 |
| POC1A    | 1 |
| POLH     | 1 |
| POU3F2   | 1 |
| PPAP2B   | 1 |
| PPARGC1B | 1 |
| PPIP5K2  | 1 |
| PPM1L    | 1 |
| PPP1R11  | 1 |
| PPP1R3B  | 1 |
| PPP1R3E  | 1 |

|         |   |
|---------|---|
| PQLC1   | 1 |
| PRCP    | 1 |
| PRELID2 | 1 |
| PRIM2   | 1 |
| PRKAR2A | 1 |
| PRR15L  | 1 |
| PRR26   | 1 |
| PRRT2   | 1 |
| PRRT3   | 1 |
| PSMA4   | 1 |
| PSMD11  | 1 |
| PTCD1   | 1 |
| PTCHD1  | 1 |
| PTEN    | 1 |
| PTGFRN  | 1 |
| PTPN4   | 1 |
| PTPRG   | 1 |
| PURB    | 1 |
| PURG    | 1 |
| QKI     | 1 |
| RAB14   | 1 |
| RAB35   | 1 |
| RABGAP1 | 1 |
| RALGPS2 | 1 |
| RAP2A   | 1 |
| RARB    | 1 |
| RASAL2  | 1 |
| RASL10B | 1 |
| RB1CC1  | 1 |
| RBM27   | 1 |
| RBMS3   | 1 |
| RCAN1   | 1 |
| RCSD1   | 1 |

|               |   |
|---------------|---|
| REL           | 1 |
| RERE          | 1 |
| RFTN2         | 1 |
| RFX7          | 1 |
| RHOBTB2       | 1 |
| RIC8B         | 1 |
| RIMS4         | 1 |
| RNASEL        | 1 |
| RNF165        | 1 |
| RNF180        | 1 |
| RNF186        | 1 |
| RNF20         | 1 |
| RNF26         | 1 |
| RNF32         | 1 |
| RNF4          | 1 |
| ROBO1         | 1 |
| ROCK2         | 1 |
| RP11-156E8.1  | 1 |
| RP11-343C2.12 | 1 |
| RP11-73M18.2  | 1 |
| RP11-766F14.2 | 1 |
| RP6-24A23.6   | 1 |
| RPA3          | 1 |
| RPAP2         | 1 |
| RPRD1A        | 1 |
| RRAGD         | 1 |
| RSBN1         | 1 |
| RUNX1T1       | 1 |
| RYBP          | 1 |
| S1PR1         | 1 |
| SAMD12        | 1 |
| SAMD14        | 1 |
| SAMD8         | 1 |

|          |   |
|----------|---|
| SAP30L   | 1 |
| SAR1A    | 1 |
| SBSPON   | 1 |
| SCARB1   | 1 |
| SCARB2   | 1 |
| SCN1A    | 1 |
| SCN3A    | 1 |
| SCN3B    | 1 |
| SDC1     | 1 |
| SDHC     | 1 |
| SEC22A   | 1 |
| SEC23IP  | 1 |
| SEL1L3   | 1 |
| SEMA3G   | 1 |
| SERPINE1 | 1 |
| SERTAD4  | 1 |
| SESN3    | 1 |
| SETD5    | 1 |
| SF1      | 1 |
| SGIP1    | 1 |
| SGMS1    | 1 |
| SH3D19   | 1 |
| SH3GL2   | 1 |
| SHISA7   | 1 |
| SHOC2    | 1 |
| SIAH2    | 1 |
| SIX3     | 1 |
| SLA2     | 1 |
| SLC10A3  | 1 |
| SLC16A2  | 1 |
| SLC19A3  | 1 |
| SLC22A23 | 1 |
| SLC24A2  | 1 |

|          |   |
|----------|---|
| SLC24A4  | 1 |
| SLC25A1  | 1 |
| SLC25A15 | 1 |
| SLC25A53 | 1 |
| SLC2A14  | 1 |
| SLC2A3   | 1 |
| SLC35C2  | 1 |
| SLC35G1  | 1 |
| SLC38A1  | 1 |
| SLC38A2  | 1 |
| SLC39A1  | 1 |
| SLC39A14 | 1 |
| SLC6A19  | 1 |
| SLC6A5   | 1 |
| SLC8A1   | 1 |
| SLC9A7   | 1 |
| SLCO3A1  | 1 |
| SLITRK3  | 1 |
| SMAD2    | 1 |
| SMAD4    | 1 |
| SMAP1    | 1 |
| SMARCA5  | 1 |
| SMG5     | 1 |
| SMG7     | 1 |
| SMUG1    | 1 |
| SMURF1   | 1 |
| SNX12    | 1 |
| SNX18    | 1 |
| SNX30    | 1 |
| SON      | 1 |
| SORCS1   | 1 |
| SORL1    | 1 |
| SORT1    | 1 |

|            |   |
|------------|---|
| SOX13      | 1 |
| SOX5       | 1 |
| SP8        | 1 |
| SPAG9      | 1 |
| SPATA2     | 1 |
| SPATS2     | 1 |
| SPECC1L    | 1 |
| SPIN3      | 1 |
| SPRY3      | 1 |
| SPTY2D1    | 1 |
| SRM        | 1 |
| SRRD       | 1 |
| SRRM4      | 1 |
| SRSF1      | 1 |
| SRSF12     | 1 |
| SSBP2      | 1 |
| SSX2IP     | 1 |
| ST6GALNAC5 | 1 |
| ST6GALNAC6 | 1 |
| ST7L       | 1 |
| ST8SIA2    | 1 |
| STAC2      | 1 |
| STARD13    | 1 |
| STAU2      | 1 |
| STC1       | 1 |
| STK35      | 1 |
| STK40      | 1 |
| STRA13     | 1 |
| STRBP      | 1 |
| STX4       | 1 |
| STXBP4     | 1 |
| STXBP6     | 1 |
| SUFU       | 1 |



|          |   |
|----------|---|
| SUPT6H   | 1 |
| SVOP     | 1 |
| SYNGAP1  | 1 |
| SYNM     | 1 |
| SYT1     | 1 |
| SYT13    | 1 |
| TAF3     | 1 |
| TAF9B    | 1 |
| TAPBP    | 1 |
| TBC1D22B | 1 |
| TBL1X    | 1 |
| TBL2     | 1 |
| TBX19    | 1 |
| TBX5     | 1 |
| TCF12    | 1 |
| TCF21    | 1 |
| TDRKH    | 1 |
| TEAD1    | 1 |
| TENM2    | 1 |
| TET2     | 1 |
| TFAP2A   | 1 |
| TFAP2C   | 1 |
| TFRC     | 1 |
| TGOLN2   | 1 |
| THBS2    | 1 |
| THSD7A   | 1 |
| TIAF1    | 1 |
| TIAM1    | 1 |
| TIFAB    | 1 |
| TJP1     | 1 |
| TLCD2    | 1 |
| TM9SF2   | 1 |
| TMC5     | 1 |

|          |   |
|----------|---|
| TMEM120B | 1 |
| TMEM132B | 1 |
| TMEM136  | 1 |
| TMEM167B | 1 |
| TMEM168  | 1 |
| TMEM170B | 1 |
| TMEM183A | 1 |
| TMEM194A | 1 |
| TMEM200C | 1 |
| TMEM216  | 1 |
| TMEM233  | 1 |
| TMEM260  | 1 |
| TMEM33   | 1 |
| TMOD1    | 1 |
| TMOD2    | 1 |
| TNIK     | 1 |
| TNPO3    | 1 |
| TNRC6B   | 1 |
| TNS4     | 1 |
| TOM1L2   | 1 |
| TOX3     | 1 |
| TPD52    | 1 |
| TPM3     | 1 |
| TPP2     | 1 |
| TPR      | 1 |
| TRIM2    | 1 |
| TRIM44   | 1 |
| TRIM5    | 1 |
| TRIM66   | 1 |
| TRIM67   | 1 |
| TRPC1    | 1 |
| TSN      | 1 |
| TSPAN9   | 1 |

|         |   |
|---------|---|
| TTC5    | 1 |
| TTL     | 1 |
| TTYH3   | 1 |
| UBA6    | 1 |
| UBE2B   | 1 |
| UBE2I   | 1 |
| UBE2W   | 1 |
| UBXN7   | 1 |
| UHMK1   | 1 |
| UNC5B   | 1 |
| UNC5D   | 1 |
| UPF3B   | 1 |
| URM1    | 1 |
| USB1    | 1 |
| USF2    | 1 |
| USH1C   | 1 |
| USP25   | 1 |
| USP44   | 1 |
| USP46   | 1 |
| USP47   | 1 |
| VASH1   | 1 |
| VASN    | 1 |
| VAT1    | 1 |
| VIPAS39 | 1 |
| VSTM5   | 1 |
| VTI1B   | 1 |
| WAPAL   | 1 |
| WASF2   | 1 |
| WASF3   | 1 |
| WBP11   | 1 |
| WDR12   | 1 |
| WDR26   | 1 |
| WDR52   | 1 |

|         |   |
|---------|---|
| WDR55   | 1 |
| WISP2   | 1 |
| WNK3    | 1 |
| WNT9B   | 1 |
| XIAP    | 1 |
| XKR4    | 1 |
| XRN1    | 1 |
| YARS    | 1 |
| YWHAZ   | 1 |
| ZBTB20  | 1 |
| ZBTB2   | 1 |
| ZBTB26  | 1 |
| ZBTB43  | 1 |
| ZBTB8B  | 1 |
| ZC2HC1C | 1 |
| ZC3H11A | 1 |
| ZC3H6   | 1 |
| ZCCHC3  | 1 |
| ZDHHC13 | 1 |
| ZDHHC18 | 1 |
| ZDHHC21 | 1 |
| ZFAND5  | 1 |
| ZFYVE1  | 1 |
| ZMYND11 | 1 |
| ZNF148  | 1 |
| ZNF202  | 1 |
| ZNF226  | 1 |
| ZNF37A  | 1 |
| ZNF385A | 1 |
| ZNF423  | 1 |
| ZNF512B | 1 |
| ZNF532  | 1 |
| ZNF549  | 1 |

|        |   |
|--------|---|
| ZNF608 | 1 |
| ZNF652 | 1 |
| ZNF704 | 1 |
| ZNF81  | 1 |
| ZNF827 | 1 |
| ZNRF2  | 1 |

| S.No. | piRNA     | Read Count (Avg) |          | Log2 Fold |
|-------|-----------|------------------|----------|-----------|
|       |           | Mock Exo         | RSV Exo  | Change    |
| 1     | piR-32678 | 127.41           | 27150.88 | 7.7353    |
| 2     | piR-31623 | 0.62             | 48.19    | 6.2854    |
| 3     | piR-34736 | 1.74             | 128.93   | 6.214     |
| 4     | piR-36169 | 6.52             | 231.03   | 5.1477    |
| 5     | piR-36170 | 6.52             | 231.03   | 5.1477    |
| 6     | piR-49143 | 22.5             | 590.86   | 4.7148    |
| 7     | piR-33748 | 7.13             | 108.2    | 3.9227    |
| 8     | piR-45371 | 7.13             | 108.2    | 3.9227    |
| 9     | piR-49144 | 126.89           | 1387.4   | 3.4508    |
| 10    | piR-33043 | 33.7             | 291.08   | 3.1105    |
| 11    | piR-33044 | 33.7             | 291.08   | 3.1105    |
| 12    | piR-34531 | 5.88             | 24.21    | 2.0418    |
| 13    | piR-34532 | 5.88             | 24.21    | 2.0418    |
| 14    | piR-34533 | 5.88             | 24.21    | 2.0418    |
| 15    | piR-34534 | 5.88             | 24.21    | 2.0418    |
| 16    | piR-34535 | 5.88             | 24.21    | 2.0418    |
| 17    | piR-34536 | 5.88             | 24.21    | 2.0418    |
| 18    | piR-51809 | 4.51             | 17.28    | 1.9379    |
| 19    | piR-51810 | 4.51             | 17.28    | 1.9379    |
| 20    | piR-51811 | 4.51             | 17.28    | 1.9379    |
| 21    | piR-58469 | 8.52             | 27.25    | 1.6768    |
| 22    | piR-61298 | 10.6             | 29.04    | 1.4536    |
| 23    | piR-34871 | 26.03            | 64.15    | 1.301     |
| 24    | piR-57125 | 46.18            | 110.77   | 1.2622    |
| 25    | piR-35549 | 13.21            | 30.88    | 1.2251    |
| 26    | piR-35550 | 13.21            | 30.88    | 1.2251    |
| 27    | piR-35551 | 13.21            | 30.88    | 1.2251    |
| 28    | piR-54265 | 18.53            | 39.57    | 1.0942    |
| 29    | piR-59169 | 1364.92          | 6.02     | -7.8241   |
| 30    | piR-50653 | 22.7             | 0.13     | -7.4733   |
| 31    | piR-50654 | 22.7             | 0.13     | -7.4733   |
| 32    | piR-50655 | 22.7             | 0.13     | -7.4733   |
| 33    | piR-55865 | 22.7             | 0.13     | -7.4733   |
| 34    | piR-56226 | 22.7             | 0.13     | -7.4733   |
| 35    | piR-34756 | 10411.18         | 82.62    | -6.9775   |
| 36    | piR-34370 | 28.39            | 0.29     | -6.6371   |
| 37    | piR-45065 | 21.57            | 0.29     | -6.2412   |
| 38    | piR-40249 | 50.07            | 0.74     | -6.0707   |
| 39    | piR-40514 | 59.65            | 1.03     | -5.8557   |

|              |              |                         |                |         |
|--------------|--------------|-------------------------|----------------|---------|
| 40           | piR-36037    | 85.04                   | 1.78           | -5.5788 |
| 41           | piR-34916    | 29.19                   | 0.63           | -5.5244 |
| 42           | piR-56647    | 40.04                   | 1.03           | -5.2807 |
| 43           | piR-59089    | 10.75                   | 0.29           | -5.2366 |
| 44           | piR-47700    | 62.72                   | 3.49           | -4.1692 |
| 45           | piR-30528    | 69.24                   | 3.99           | -4.116  |
| 46           | piR-58651    | 69.24                   | 3.99           | -4.116  |
| 47           | piR-30606    | 116.43                  | 6.73           | -4.1118 |
| 48           | piR-36001    | 116.43                  | 6.73           | -4.1118 |
| 49           | piR-34983    | 32.87                   | 2.12           | -3.9518 |
| 50           | piR-45201    | 32.87                   | 2.12           | -3.9518 |
| 51           | piR-33497    | 39.01                   | 2.58           | -3.9163 |
| 52           | piR-61644    | 71.79                   | 10.79          | -2.7334 |
|              |              |                         |                |         |
|              |              | <b>Read Count (Avg)</b> |                |         |
| <b>S.No.</b> | <b>piRNA</b> | <b>Mock Exo</b>         | <b>RSV Exo</b> |         |
| 1            | piR-31703    | 0                       | 254.19         | N/A     |
| 2            | piR-33650    | 0                       | 209.91         | N/A     |
| 3            | piR-40982    | 0                       | 209.39         | N/A     |
| 4            | piR-32079    | 0                       | 209.21         | N/A     |
| 5            | piR-31961    | 0                       | 208.91         | N/A     |
| 6            | piR-33527    | 0                       | 153.92         | N/A     |
| 7            | piR-33526    | 0                       | 153.02         | N/A     |
| 8            | piR-36716    | 0                       | 127.96         | N/A     |
| 9            | piR-36715    | 0                       | 127.67         | N/A     |
| 10           | piR-36714    | 0                       | 127.39         | N/A     |
| 11           | piR-36494    | 0                       | 127.01         | N/A     |
| 12           | piR-36713    | 0                       | 125.77         | N/A     |
| 13           | piR-35059    | 0                       | 124.97         | N/A     |
| 14           | piR-34608    | 0                       | 118.37         | N/A     |
| 15           | piR-48517    | 0                       | 118.37         | N/A     |
| 16           | piR-60668    | 0                       | 58.07          | N/A     |
| 17           | piR-61919    | 0                       | 46.01          | N/A     |
| 18           | piR-31701    | 0                       | 36.7           | N/A     |
| 19           | piR-34221    | 0                       | 21.87          | N/A     |
| 20           | piR-61950    | 19.15                   | 0              | N/A     |
| 21           | piR-59554    | 13.59                   | 0              | N/A     |
| 22           | piR-61974    | 11.12                   | 0              | N/A     |

Supplementary Table 5. Complete list of piRNAs whose expression in exosomes was changed following RSV infection.

Fig 2(b) left panel

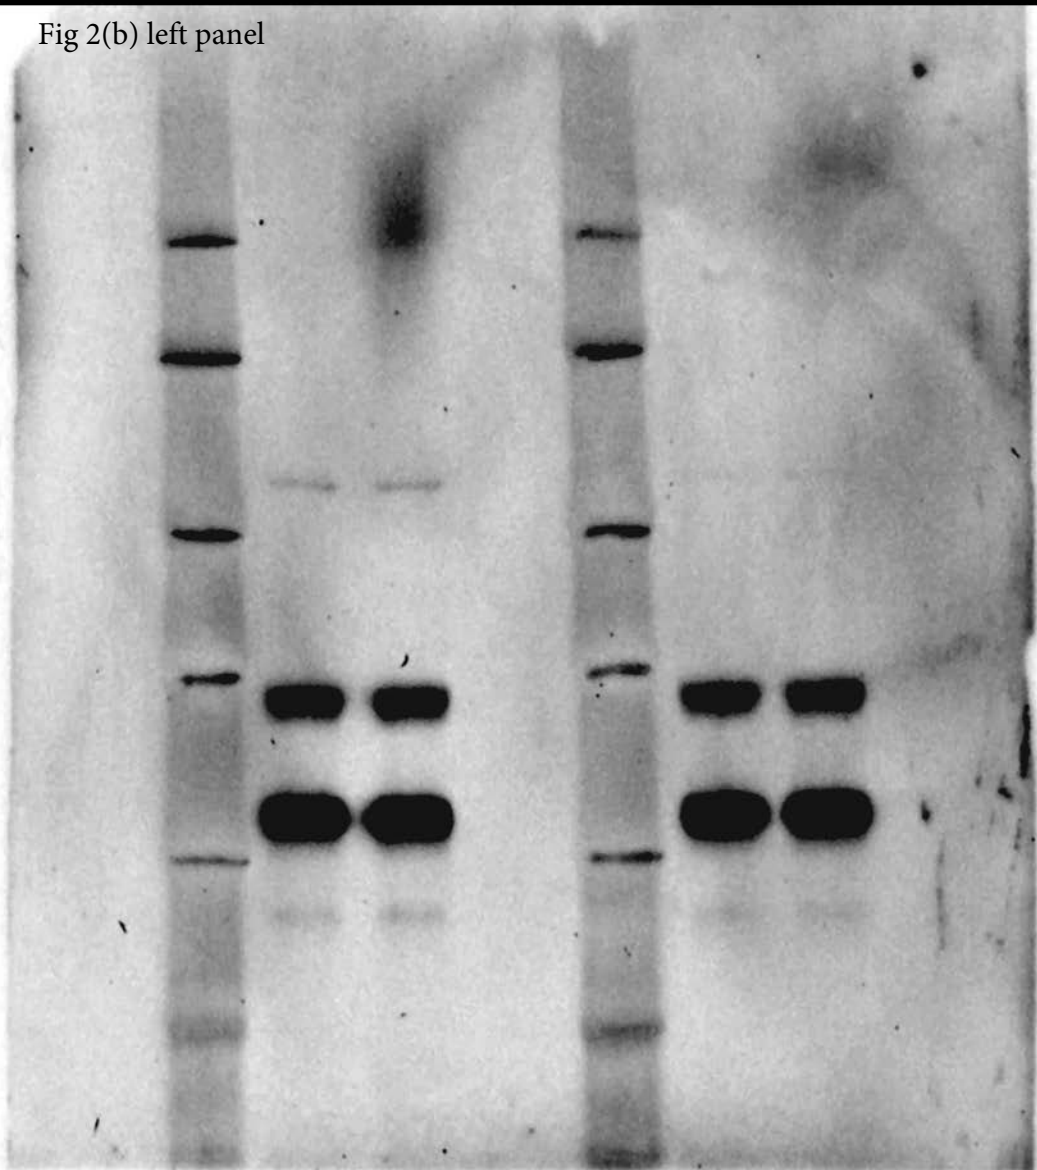

Fig 2(b) right panel

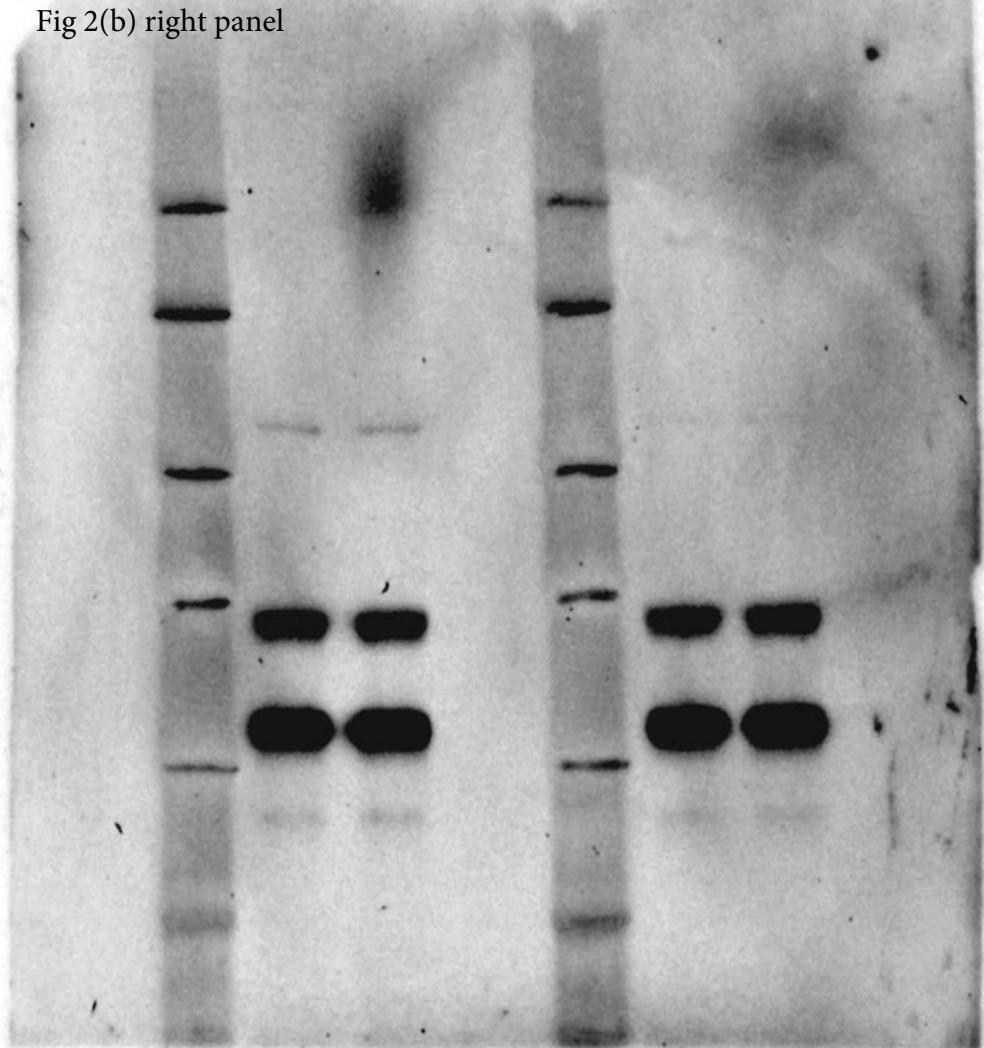

Fig 2(d) left panel

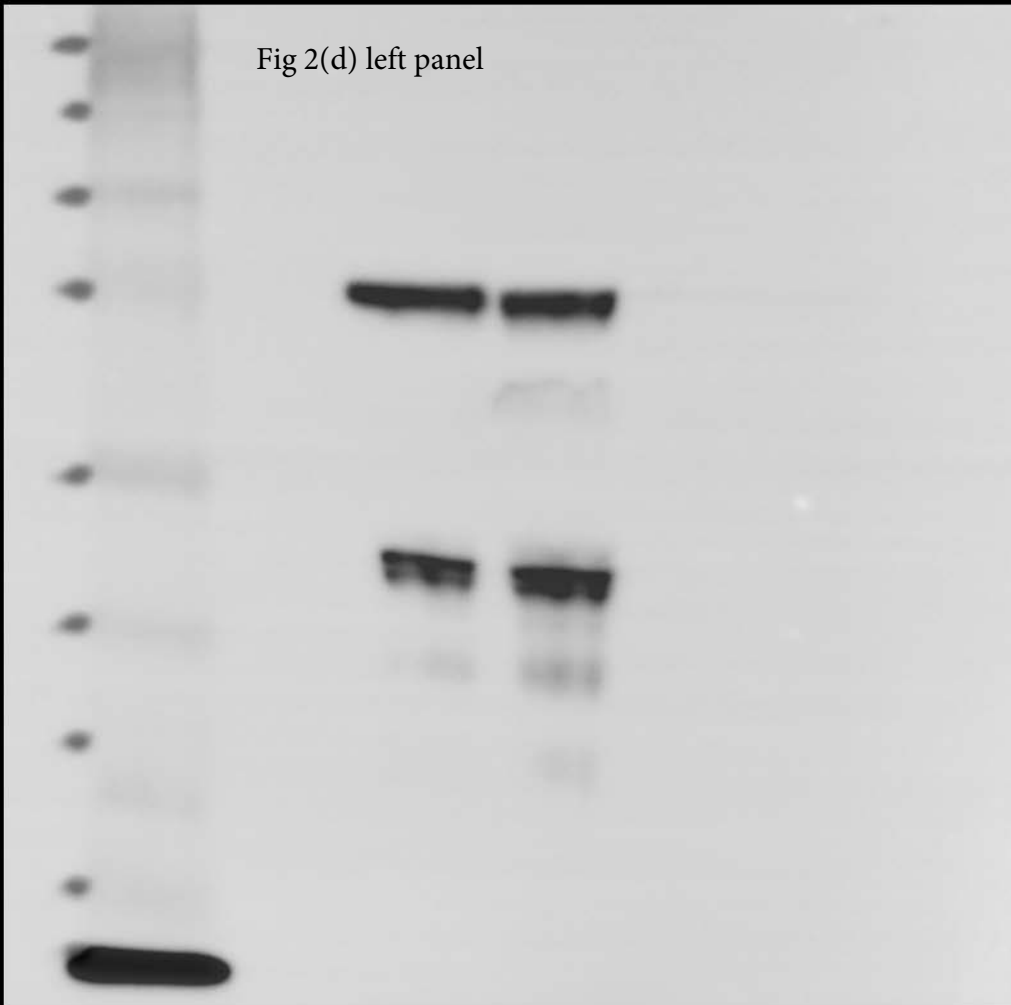



Fig 3 top

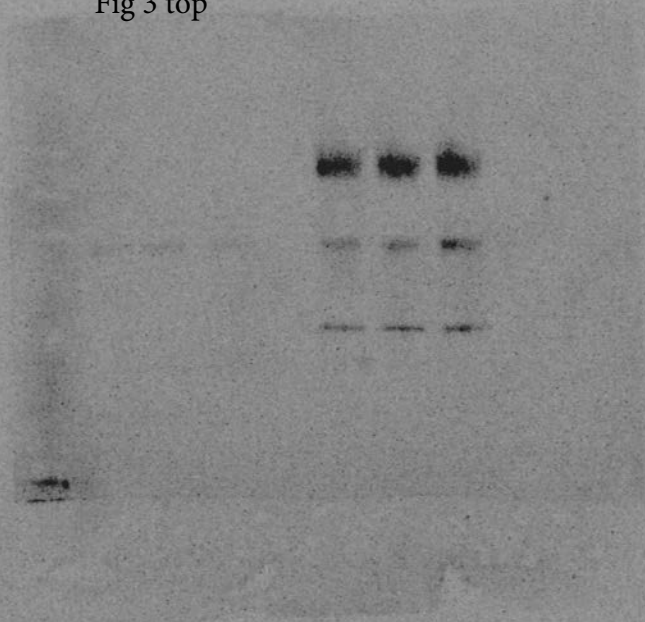

Fig 3 bottom

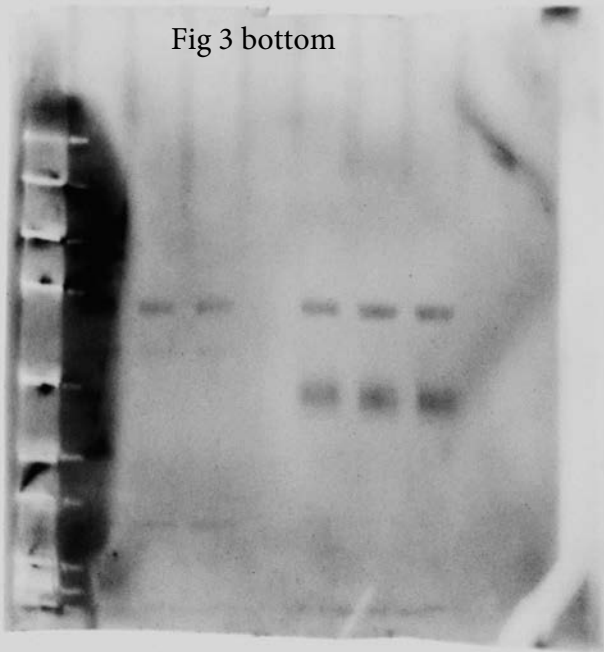

Supplement: 41598_2017_18672_MOESM1_ESM.pdf [file 41598_2017_18672_MOESM1_ESM.pdf]
